# Supplementary material for: Atmospheric and Room Temperature Plasma (ARTP) Mutagenesis Improved the Anti-MRSA Activity of Brevibacillus sp. SPR20
Source: Int J Mol Sci. 2023 Jul 27;24(15):12016. doi: 10.3390/ijms241512016 (PMC10419081; doi:10.3390/ijms241512016)
Supplement: Supplementary file 1 [file ijms-24-12016-s001.zip › 3 - Supplement Material Table.xlsx]

## Sheet: Differentially expres protein
Gene name	Protein name	Coverage [%]	# Peptides	MW [kDa]	calc. pI	Biological Process	Cellular Component	Molecular Function	Pfam IDs	Entrez Gene ID	Ensembl Gene ID	Gene Symbol	KEGG Pathways	Abundance Ratio: (Sample) / (Control)	Abundance Ratio Adj. P-Value: (Sample) / (Control)
pcrB	Heptaprenylglyceryl phosphate synthase	4	1	25.5	4.54									100	4.46807e-16
A0A075RAN9	Putative copper-importing P-type ATPase A	2	1	68	6.23	transport	membrane	catalytic activity;metal ion binding;nucleotide binding;transporter activity	Pf00122, Pf00702, Pf12710	34877439	BRLA_c041860	BRLA_RS20190		100	4.46807e-16
A0A2S5H3D0	Multifunctional 2',3'-cyclic-nucleotide 2'-phosphodiesterase/5'-nucleotidase/3'-nucleotidase	14	8	67.6	7.46									100	4.46807e-16
A0A385TD34	Threonine synthase	29	6	37.6	6.43									100	4.46807e-16
A0A177XSD9	Urocanate reductase	2	1	63.2	7.02	metabolic process	membrane	catalytic activity;nucleotide binding	Pf00890, Pf03486, Pf04205		AYJ08_02380			100	4.46807e-16
A0A075R7M4	Flagellin	64	27	41.1	5.81	cellular component movement	extracellular	structural molecule activity	Pf00669, Pf00700	34878165	BRLA_c028690	BRLA_RS13965	Flagellar assembly; Two-component system	100	4.46807e-16
A0A0K9YU01	Anthranilate synthase component II	15	2	21.7	6.2	metabolic process		catalytic activity	Pf00117, Pf07722		ADS79_14435			100	4.46807e-16
A0A3M8C1C7	Lipoprotein	5	1	29.4	5.15									100	4.46807e-16
glpX	Fructose-1,6-bisphosphatase	10	2	34.3	5.27									100	4.46807e-16
J3AIB6	Uncharacterized protein	8	1	18.3	7.39						PMI05_00358			100	4.46807e-16
rocD	Ornithine aminotransferase	33	10	43.5	5.6									100	4.46807e-16
A0A4Y3PDX0	Probable glycine dehydrogenase (decarboxylating) subunit 1	4	2	48.8	5.59									100	4.46807e-16
dut	Deoxyuridine 5'-triphosphate nucleotidohydrolase	7	1	15.9	5.25									100	4.46807e-16
A0A2P7VDF0	Peroxiredoxin	23	2	17.2	5.08									4.881	1.96855e-06
A0A502I3G0	BMC domain-containing protein	13	1	9.3	5.35									4.33	1.20722e-06
porA	Pyruvate synthase subunit PorA	28	16	84.7	5.95									4.262	4.97546e-09
eutM	Ethanolamine utilization microcompartment protein EutM	12	1	9.9	6.95									4.24	1.86542e-06
gcvT	Aminomethyltransferase	34	9	40.4	5.5									3.614	2.31734e-07
A0A2S5HYS1	Glycosyl transferase	15	3	45	4.64									3.52	4.48792e-05
ribBA	Riboflavin biosynthesis protein RibBA	7	2	44.3	6.15									3.118	0.00026596
cspD	Cold shock-like protein CspD	41	3	7.4	4.94									2.684	1.20451e-06
hcp	Hydroxylamine reductase	5	1	47.3	5.71									2.617	0.000423313
A0A075RC10	Uncharacterized protein	7	1	20.6	6.05				Pf01814	34877354	BRLA_c027160	BRLA_RS13200		2.582	0.00150511
rpsE	30S ribosomal protein S5	66	9	17.2	9.88									2.563	0.000134328
A0A075R3H1	Long-chain-fatty-acid--CoA ligase	13	5	56.3	6	metabolic process	membrane	catalytic activity	Pf00501, Pf13193, Pf14535	34877934	BRLA_c027580	BRLA_RS13420		2.397	3.67911e-05
trpS	Tryptophan--tRNA ligase	8	2	37.1	6.99									2.364	0.00573441
guaB	Inosine-5'-monophosphate dehydrogenase	15	5	52.1	6.28									2.321	0.0297895
A0A502I6U6	XRE family transcriptional regulator	26	4	20.6	6.11									2.291	0.017666
A0A177XL34	Cation/cationic drug transporter	8	1	12.6	9.2	transport	membrane				AYJ08_14865			2.279	0.0475234
nirB	Nitrite reductase [NAD(P)H], large subunit	26	16	88.9	5.59									2.278	0.000154208
A0A177XJ71	Phosphoesterase	10	1	20.3	6.57	metabolic process		catalytic activity;metal ion binding	Pf00149, Pf00837, Pf12850		AYJ08_14580			2.152	0.0899884
odhA	2-oxoglutarate dehydrogenase E1 component	22	20	106.5	6.34									2.118	0.00583699
A0A177XSN0	Nitrite reductase	16	1	12.1	4.75	metabolic process		catalytic activity	Pf00355, Pf13806		AYJ08_02405			2.101	0.0370439
tuf	Elongation factor Tu	47	12	43.2	5.15									2.071	0.0842408
sucA	2-oxoglutarate dehydrogenase E1 component	23	21	106.8	6.29									2.07	0.00177437
A0A075R5M3	Putative RNA-binding protein, contains TRAM domain	13	2	43.6	6				Pf09822	34875736	BRLA_c035950	BRLA_RS17385		2.048	0.0202194
A0A385T6V5	Pyruvate synthase	23	14	84.7	6.09									2.038	0.0339749
hpf	Ribosome hibernation promoting factor	34	5	21.3	5.68									2.029	0.00280533
dltA	D-alanine--poly(Phosphoribitol) ligase, subunit 1	6	47	1385.4	5.05									2.022	0.0323865
A0A075QZC1	50S ribosomal protein L33	26	1	6	9.85	metabolic process	ribosome	structural molecule activity	Pf00471		BRLA_c001610		Ribosome	2.011	0.0154001
ppaC	Probable manganese-dependent inorganic pyrophosphatase	52	14	33.8	5									2.004	0.0392169
A0A2S5H3Z1	ABC transporter ATP-binding protein	4	1	28.1	6.02									1.978	0.0813448
H0U8G1	Uncharacterized protein	56	13	35.6	5.25				Pf04392, Pf13407		BLGI_1673			1.952	0.0564478
H0UFS4	Uncharacterized HDIG domain protein	5	2	44.7	6.29				Pf01966, Pf08668, Pf13487		BLGI_4286			1.921	0.066952
guaB	Inosine-5'-monophosphate dehydrogenase	15	5	52.2	6.76									1.91	0.114237
A0A075R615	DinB superfamily protein	21	2	17.4	5.99				Pf04978, Pf07609, Pf12867	34875323	BRLA_c006870	BRLA_RS03405		1.904	0.223391
A0A0F6Y0J3	Polyketide synthase	11	30	385.8	6.57	metabolic process		catalytic activity	Pf00106, Pf00108, Pf00109, Pf00550, Pf02801, Pf08241, Pf08242, Pf08659, Pf12847, Pf13489, Pf13561, Pf13649, Pf13847					1.901	0.070544
A0A502I085	DNA starvation/stationary phase protection protein	31	5	17.3	4.89									1.885	0.0124776
A0A0F7EJK3	[Acyl-carrier-protein] S-malonyltransferase	14	3	47.2	6.2	metabolic process		catalytic activity	Pf00698					1.885	0.172448
ald	Alanine dehydrogenase	50	14	39.9	5.82									1.866	0.0146881
sucC	Succinate--CoA ligase [ADP-forming] subunit beta	49	18	41.4	5.01									1.858	0.0447108
A0A177XP20	Uncharacterized protein	2	6	475.1	5.06	metabolic process		catalytic activity	Pf00501, Pf00550, Pf00668, Pf00975, Pf13193, Pf13745		AYJ08_06105			1.855	0.0962592
hcp	Hydroxylamine reductase	8	2	47.3	5.77									1.854	0.0166474
A0A6M1UBR8	ABC transporter ATP-binding protein	2	1	56.4	6.28									1.848	0.0243198
rplC	50S ribosomal protein L3	58	10	22.3	9.74									1.832	0.0289001
V6ME00	Thioredoxin	10	1	20	4.88	cellular homeostasis;metabolic process;regulation of biological process		antioxidant activity;catalytic activity	Pf00578, Pf08534, Pf13905		T458_22770			1.832	0.0289001
A0A2S5H3P9	Multidrug ABC transporter	19	15	112.9	6.1									1.83	0.116676
A0A075QY58	NRPS domain-containing protein	20	10	72.9	5.55	metabolic process		catalytic activity	Pf00501, Pf00550, Pf13193	34877082	BRLA_c009460	BRLA_RS04650		1.828	0.020814
hcp	Hydroxylamine reductase	37	11	47.2	5.69									1.823	0.0220008
thiE	Thiamine-phosphate synthase	14	2	24.6	7.52									1.816	0.123758
gldA	Glycerol dehydrogenase	23	6	40.1	5.17									1.809	0.118566
A0A518VAI0	Amino acid adenylation domain-containing protein	1	2	242.6	5.48									1.788	0.191515
thiC	Phosphomethylpyrimidine synthase	24	14	65.9	6.46									1.786	0.177328
icmF	Fused isobutyryl-CoA mutase	4	3	121.7	6.05									1.773	0.223391
A0A6M1UG99	Sugar ABC transporter substrate-binding protein	5	1	41.3	6.19									1.769	0.22126
fhs	Formate--tetrahydrofolate ligase	19	8	57.9	6.13									1.738	0.438068
deoD	Purine nucleoside phosphorylase DeoD-type	14	3	25.8	5.91									1.733	0.187159
A0A0F6Y015	Beta-glucosidase	2	1	55.3	5.74	metabolic process		catalytic activity	Pf00150, Pf00232					1.721	0.315024
ahcY	Adenosylhomocysteinase	16	8	46.2	5.66									1.719	0.0608602
A0A518VDN5	DAK2 domain-containing protein	4	2	61.9	4.65									1.717	0.205482
A0A2S5I4B0	6-phosphogluconate dehydrogenase	4	2	69.3	8									1.714	0.209073
A0A518VEL6	Amino acid adenylation domain-containing protein	1	5	555	5.36									1.713	0.119856
A0A291BQN5	Crp/Fnr family transcriptional regulator	4	1	26.4	5.48									1.711	0.338225
A0A6M1UDH1	Dihydrolipoamide acetyltransferase component of pyruvate dehydrogenase complex	8	3	48.6	5.57									1.71	0.223391
hslV	ATP-dependent protease subunit HslV	11	1	20.1	6.55									1.71	0.356812
A0A075R259	NRPS domain-containing protein	2	5	288.9	5.12	metabolic process		catalytic activity	Pf00501, Pf00550, Pf00668, Pf13193, Pf13745	34874891	BRLA_c009470	BRLA_RS04655	Nonribosomal peptide structures; Quorum sensing	1.7	0.20488
A0A518VB75	Acryloyl-CoA reductase	15	3	35.5	5.55									1.693	0.207744
dnaA	Chromosomal replication initiator protein DnaA	4	1	50.9	6.83									1.692	0.496171
abrB	Transcriptional regulator, AbrB family domain protein	37	3	9.5	7.8									1.692	0.0797276
H0U5F1	Cytochrome P450 family protein	5	2	50.3	6.68	metabolic process		catalytic activity;metal ion binding	Pf00067		BLGI_581			1.689	0.226255
A0A502IN40	DUF3050 domain-containing protein	18	3	28.2	4.93									1.675	0.249404
rplP	50S ribosomal protein L16	23	2	16.1	10.29									1.666	0.47329
A0A0F7EIM1	Histidine ammonia-lyase	24	11	60	6.35			catalytic activity	Pf00221					1.663	0.20224
A0A518VB60	Amino acid adenylation domain-containing protein	3	16	1383.4	5.01									1.662	0.183201
A0A2S5I565	Flagellin	63	27	41.3	5.67									1.658	0.253891
tycC	Tyrocidine synthase 3	2	4	295.4	5.58									1.656	0.223391
prfC	Peptide chain release factor 3	2	1	60.9	6.21									1.649	0.437279
nfuA	Fe/S biogenesis protein NfuA	44	2	8	4.61									1.646	0.272481
M8E9G4	Aconitate hydratase	13	12	98.5	5.36	metabolic process		catalytic activity;metal ion binding	Pf00330, Pf00694		I532_14693			1.646	0.110003
A0A177XI39	NAD(P)-dependent oxidoreductase	6	2	46.5	5.81	metabolic process		catalytic activity	Pf01113, Pf02737		AYJ08_18215			1.645	0.292265
trxA	Thioredoxin	27	2	11.5	4.88									1.643	0.223391
clpP	ATP-dependent Clp protease proteolytic subunit	13	2	21.5	4.98									1.639	0.249366
A0A0K9YYG9	Cold-shock protein	11	1	7.4	4.88	regulation of biological process	cytoplasm	DNA binding	Pf00313		ADS79_07110			1.637	0.196886
A0A075R5H5	Phosphoenolpyruvate synthase	20	13	100.4	5.52	metabolic process		catalytic activity;nucleotide binding	Pf00391, Pf01326	34875830	BRLA_c023910	BRLA_RS11610	Pyruvate metabolism; Microbial metabolism in diverse environments; Metabolic pathways; Methane metabolism; Carbon metabolism	1.63	0.118513
thrB	Homoserine kinase	11	2	33.8	4.91									1.623	0.322531
A0A075RAZ9	S-adenosylmethionine--diacylglycerol 3-amino-3-carboxypropyl transferase	3	1	44.2	8.28			catalytic activity	Pf11899	34876580	BRLA_c023900	BRLA_RS11605	Glycerophospholipid metabolism	1.622	0.320207
A0A0F6Y0J0	Glutamate:protein symporter	4	1	44.1	8.82	transport	membrane	transporter activity	Pf00375					1.616	0.315024
A0A177XPI3	6-hydroxynicotinate 3-monooxygenase	12	2	41.7	8.56	metabolic process		catalytic activity;nucleotide binding	Pf01494		AYJ08_08150			1.61	0.327521
A0A385T7G9	NADP-dependent glyceraldehyde-3-phosphate dehydrogenase	2	1	52.4	5.67									1.607	0.330499
A0A518V664	Thiol-activated cytolysin	3	1	56.5	5.58									1.604	0.549949
A0A177XPN1	Non-ribosomal peptide synthetase	5	36	1384.2	5.05	metabolic process;regulation of biological process		catalytic activity	Pf00501, Pf00550, Pf00668, Pf13193, Pf13745		AYJ08_06110			1.602	0.338225
deoC	Deoxyribose-phosphate aldolase	15	3	23.8	5.11									1.595	0.327521
ackA	Acetate kinase	48	14	44	6.02									1.588	0.165007
A0A075RA38	Uncharacterized protein	10	3	45.1	5.15					34877247	BRLA_c020890	BRLA_RS10215		1.58	0.284378
A0A177XR57	Tryptophan--tRNA ligase	28	6	37	7.33	metabolic process	cytoplasm	catalytic activity;nucleotide binding	Pf00579		AYJ08_03690			1.577	0.357621
A0A075R4Z3	Uncharacterized protein	7	1	18.8	12.13		membrane		Pf13828	34876017	BRLA_c003000	BRLA_RS01505		1.57	0.513064
A0A385T8X0	Amino acid adenylation domain-containing protein	5	9	268	5.3									1.57	0.37813
H0U5W9	Pyridoxamine 5'-phosphate oxidase family protein	8	1	23	7.25	metabolic process		catalytic activity;nucleotide binding	Pf01243		BLGI_750			1.568	0.654357
A0A3M8BE44	HD-GYP domain-containing protein	3	1	40.7	6.74									1.566	0.231925
A0A0F6XYQ6	Formate acetyltransferase	42	28	84.9	6.19	metabolic process	cytoplasm	catalytic activity	Pf01228, Pf02901					1.563	0.304062
A0A3M8DGW6	Histidine kinase	2	1	67.1	6.68									1.562	0.338018
trpE	Anthranilate synthase component 1	32	10	57.8	5.78									1.562	0.197805
A0A075RBC4	Uncharacterized protein	5	2	47.1	5.43			catalytic activity		34876416	BRLA_c024800	BRLA_RS12045		1.561	0.4004
idhA	D-isomer specific 2-hydroxyacid dehydrogenase, catalytic domain protein	45	13	37.2	6.01									1.56	0.199728
btF	Nonribosomal peptide synthetase F	5	10	284.2	5.33									1.556	0.205482
A0A075R4X7	NRPS domain-containing protein	6	49	1385.2	5.06	metabolic process;regulation of biological process		catalytic activity	Pf00501, Pf00550, Pf00668, Pf13193, Pf13745	34875933	BRLA_c025650	BRLA_RS12440		1.555	0.208405
H0UB34	Septation ring formation regulator, EzrA family protein	2	2	91.2	4.91	cell organization and biogenesis	cytoskeleton;membrane		Pf04536, Pf06160		BLGI_2607			1.549	0.405201
A0A075R355	Ornithine cyclodeaminase	22	5	36.2	6.38				Pf02423	34878036	BRLA_c026480	BRLA_RS12855	Biosynthesis of secondary metabolites; Arginine and proline metabolism; Biosynthesis of antibiotics; Biosynthesis of amino acids	1.543	0.37076
H0U489	Uncharacterized protein	40	9	31.4	6.1		membrane	nucleotide binding			BLGI_154			1.538	0.231536
A0A4U2YAF4	Peptide ABC transporter substrate-binding protein	5	1	59.7	5.08									1.538	0.53853
mgsA	Methylglyoxal synthase	26	2	14.4	6.37									1.536	0.391616
A0A177XNS3	Siroheme decarboxylase	39	12	40.1	6.11	regulation of biological process		DNA binding	Pf13404		AYJ08_09955			1.533	0.479935
A0A177XNH0	Riboflavin biosynthesis protein	6	1	36.7	6.61	metabolic process		catalytic activity;nucleotide binding	Pf01687, Pf06574		AYJ08_10115			1.529	0.659083
A0A2S5H9P7	Glycosyl hydrolase	5	2	45.3	6.16									1.526	0.45538
A0A075R437	Geranylgeranyl pyrophosphate synthase	6	1	36	9.44	metabolic process		catalytic activity	Pf00348	34875602	BRLA_c019150	BRLA_RS09350	Biosynthesis of secondary metabolites; Terpenoid backbone biosynthesis	1.526	0.659083
A0A3M8D4U6	AbrB/MazE/SpoVT family DNA-binding domain-containing protein	17	2	10	7.94									1.526	0.45538
A0A177XNY6	Glycerol-3-phosphate dehydrogenase	12	6	61.9	8.16	metabolic process		catalytic activity	Pf00890, Pf01266		AYJ08_10395			1.525	0.335381
rocD	Ornithine aminotransferase	47	16	43.4	5.6									1.524	0.254003
H0UEX0	Uncharacterized protein	7	2	38.5	4.96						BLGI_3972			1.521	0.471743
A0A502J1L5	4Fe-4S dicluster domain-containing protein	12	2	19.5	5.54									1.519	0.364136
A0A075R2M6	Methyl-accepting chemotaxis protein McpB	29	14	63.3	4.68	regulation of biological process;response to stimulus	membrane	signal transducer activity	Pf00015, Pf00672	34876780	BRLA_c013210	BRLA_RS06480	Two-component system; Bacterial chemotaxis	1.519	0.262203
A0A2S5I594	Nucleotide sugar dehydrogenase	18	5	47.2	5.72									1.513	0.753277
A0A075R9C8	Uncharacterized protein	12	2	31.3	8.75					34878728	BRLA_c042090	BRLA_RS20305		1.512	0.505367
lipA	Lipoyl synthase	20	5	33.3	7.78									1.511	0.398967
trpE	Anthranilate synthase component 1	10	4	59.1	5.86									1.504	0.43718
cobT	Nicotinate-nucleotide--dimethylbenzimidazole phosphoribosyltransferase	25	6	36.9	5.57									1.501	0.330499
A0A3M8B0K8	Glyceraldehyde-3-phosphate dehydrogenase	5	1	37.8	6.62									1.501	0.296865
H0U7A1	SpoIID/LytB domain protein	2	1	66.2	7.25	cell differentiation			Pf08486		BLGI_1254			1.499	0.58926
A0A3M8AZL0	Uncharacterized protein	4	1	25.7	8.92									1.496	0.307356
A0A656ZLU0	Efflux transporter periplasmic adaptor subunit	2	1	47.3	8.44									1.496	0.307356
A0A075RBV8	Dihydrolipoyllysine-residue succinyltransferase component of 2-oxoglutarate dehydrogenase complex	41	17	44.9	5.62	metabolic process		catalytic activity	Pf00198, Pf00364, Pf02817, Pf13533	34874740	BRLA_c026660	BRLA_RS12945	Biosynthesis of antibiotics; Citrate cycle (TCA cycle); Metabolic pathways; Lysine degradation; Microbial metabolism in diverse environments; Carbon metabolism; Biosynthesis of secondary metabolites	1.496	0.307356
A0A502IR03	Isocitrate dehydrogenase [NADP]	41	17	46.8	5.2									1.494	0.310505
A0A2S5HI38	RNA-binding protein S1	36	5	16.1	9.45									1.493	0.31297
A0A502ISF3	Amino acid adenylation domain-containing protein	4	18	735	5.07									1.491	0.515088
A0A0F7BYJ2	Uncharacterized protein	17	2	16.3	4.65				Pf01934					1.483	0.496171
rpmJ	50S ribosomal protein L36	62	3	4.3	10.23									1.479	0.336379
dnaK	Chaperone protein DnaK	51	31	66	4.82									1.478	0.547561
rplC	50S ribosomal protein L3	23	3	22.3	9.89									1.475	0.459814
rpmB	50S ribosomal protein L28	26	2	6.9	12.1									1.474	0.346158
rplP	50S ribosomal protein L16	43	4	16.1	10.37									1.472	0.352446
A0A0K9YIR2	Catabolite control protein A	15	4	36.9	5.54	metabolic process;regulation of biological process		DNA binding	Pf00356, Pf00532, Pf13377, Pf13407		ADS79_31785			1.468	0.659083
rplR	50S ribosomal protein L18	60	4	13.1	10.46									1.464	0.766008
rpmF	50S ribosomal protein L32	30	2	6.4	10.49									1.462	0.370965
H0UDF3	ACT domain protein	42	6	24	6.16	metabolic process		catalytic activity	Pf00478, Pf00571, Pf01842		BLGI_3445			1.46	0.375213
porA	Pyruvate synthase subunit porA domain protein	29	17	84.7	6.09									1.457	0.385661
valS	Valine--tRNA ligase	8	5	102.2	5.62									1.454	0.515088
A0A177XL09	Riboflavin transporter	8	1	23.4	9.8	transport	membrane	transporter activity	Pf12822		AYJ08_01080			1.453	0.613171
A0A502HQT1	Lactate dehydrogenase	22	6	37.3	5.63									1.45	0.714134
A0A385T3U8	Glycerol dehydrogenase	11	3	40.2	5.17									1.449	0.801074
A0A0F7BZH6	Methyltransferase	17	3	24.1	5.27	metabolic process		catalytic activity	Pf01135, Pf01596, Pf08704, Pf12847, Pf13578, Pf13659, Pf13847					1.446	0.503185
A0A075R9Z5	PKS domain-containing protein	18	32	253.5	6.1	metabolic process		catalytic activity	Pf00106, Pf00108, Pf00109, Pf02801, Pf08659, Pf13561, Pf14765	34876770	BRLA_c020390	BRLA_RS09970		1.446	0.502325
rpmA	50S ribosomal protein L27	18	1	10.9	10.58									1.445	0.407496
A0A075R1J3	Putative pyridoxal phosphate-dependent acyltransferase	40	11	43.1	6.38	metabolic process		catalytic activity	Pf00155, Pf01053, Pf01276	34877787	BRLA_c009350	BRLA_RS04595	Glycine, serine and threonine metabolism	1.44	0.621145
A0A177XQR9	Flagellar motor switch protein FliM	5	1	37.6	4.94	cellular component movement		catalytic activity;motor activity	Pf01052, Pf02154		AYJ08_04560			1.436	0.659083
H0U8Q5	6-phospho-beta-glucosidase	14	4	49.6	5.77	metabolic process		catalytic activity	Pf02056, Pf11975		BLGI_1773			1.431	0.586863
A0A075R1L9	Putative tRNA (Adenine(37)-N6)-methyltransferase	15	2	17.9	6.35	metabolic process		catalytic activity	Pf01980	34876644	BRLA_c007900	BRLA_RS03895		1.426	0.522006
A0A3M8DW46	Alpha-ketoacid dehydrogenase subunit beta	11	3	35.4	5.36									1.422	0.654449
A0A177XQ53	Plipastatin synthase	12	7	72.8	5.74	metabolic process		catalytic activity	Pf00501, Pf00550, Pf13193		AYJ08_08230			1.422	0.627113
tig	Trigger factor	46	16	48.2	4.69									1.422	0.654449
A0A075R3N5	Aryl-phospho-beta-D-glucosidase BglH	2	1	55.9	5.47	metabolic process		catalytic activity	Pf00150, Pf00232	34876267	BRLA_c021630	BRLA_RS10545	Starch and sucrose metabolism; Glycolysis / Gluconeogenesis	1.421	0.716442
H0U747	Tat (Twin-arginine translocation) pathway signal sequence domain protein	9	1	19.6	8.63	metabolic process	membrane	catalytic activity	Pf00355		BLGI_1200			1.418	0.647446
mqo	Probable malate:quinone oxidoreductase	19	7	57.4	6.61									1.417	0.476186
ribBA	Riboflavin biosynthesis protein RibBA	15	5	44.4	7.08									1.413	0.485146
rpmE	50S ribosomal protein L31	50	3	7.4	9.25									1.406	0.496171
A0A0F7BZV4	Chemotaxis protein	4	2	73.7	4.87	regulation of biological process;response to stimulus	membrane	signal transducer activity	Pf00015, Pf00672, Pf02743					1.403	0.677115
A0A177XMI9	Aldedh domain-containing protein	10	1	52.5	7.69	metabolic process		catalytic activity	Pf00171		AYJ08_08475			1.402	0.849857
A0A0F7EIB4	LamB/YcsF family protein	17	4	28.2	6	metabolic process		catalytic activity	Pf03746					1.401	0.626097
A0A075R2D7	Formate acetyltransferase	49	30	84.9	6.2	metabolic process	cytoplasm	catalytic activity	Pf01228, Pf02901	34875747	BRLA_c010330	BRLA_RS05055	Butanoate metabolism; Metabolic pathways; Propanoate metabolism; Pyruvate metabolism	1.395	0.527824
panD	Aspartate 1-decarboxylase	7	1	13.9	5.45									1.393	0.814649
mraW	Ribosomal RNA small subunit methyltransferase H	10	2	34.3	6.15									1.389	0.654449
A0A0F7EHJ7	ATPase AAA	3	1	48.7	6.3	metabolic process;response to stimulus		catalytic activity;DNA binding;nucleotide binding;RNA binding	Pf00004, Pf00910, Pf01078, Pf05496, Pf07724, Pf07728, Pf12002, Pf13173, Pf13177, Pf13191, Pf13207, Pf13401					1.386	0.801074
A0A075R6F8	Antilisterial bacteriocin subtilosin biosynthesis protein AlbA	21	7	44.3	6.89			catalytic activity;metal ion binding	Pf04055, Pf13353, Pf13394	34878893	BRLA_c027170	BRLA_RS13205		1.384	0.56577
A0A0F7EGK0	Universal stress protein	55	7	16.1	5.14	response to stimulus			Pf00582					1.382	0.573822
pyrG	CTP synthase	9	4	58.9	6.04									1.379	0.821096
yjlD	NADH dehydrogenase-like protein yjlD	40	11	43.6	6.44									1.378	0.588209
lon	Lon protease	2	2	87.8	6.42									1.378	0.737227
A0A075RBC8	Alanine-anticapsin ligase BacD	2	1	47.7	6.4			catalytic activity;metal ion binding;nucleotide binding	Pf01071, Pf07478, Pf08443, Pf13535	34878803	BRLA_c024850	BRLA_RS12070		1.376	0.760809
trmB	tRNA (guanine-N(7)-)-methyltransferase	6	1	26.4	9.14									1.37	0.749678
A0A3M8BFL9	NifU family protein	44	2	8	4.72									1.37	0.676727
cheB	Protein-glutamate methylesterase/protein-glutamine glutaminase	7	2	41.1	7.94									1.369	0.742679
rplI	50S ribosomal protein L9	23	3	16.6	9.41									1.368	0.621145
H0UBK7	Flavin reductase like domain protein	6	1	20.4	5.12			nucleotide binding	Pf01613		BLGI_2780			1.365	0.814649
A0A385T3U0	Aromatic amino acid lyase	16	8	61.1	5.9									1.364	0.760809
H0UBX1	Glycosyltransferase, MGT family protein	12	3	44.9	4.75	metabolic process		catalytic activity	Pf00201, Pf04101, Pf13528, Pf13692		BLGI_2894			1.364	0.752678
A0A075R4K0	Uncharacterized protein	10	1	17.2	5.19					34876930	BRLA_c020900	BRLA_RS10220		1.363	0.769841
pcp	Pyrrolidone-carboxylate peptidase	4	1	23.4	5.39									1.36	0.743234
pcp	Pyrrolidone-carboxylate peptidase	30	3	23.7	5.87									1.36	0.717126
ppsD3	Plipastatin synthase subunit D	4	10	469.9	5.08									1.36	0.767781
A0A075RC06	Assimilatory nitrate reductase catalytic subunit	20	10	81.7	7.01	metabolic process		catalytic activity;metal ion binding	Pf00384, Pf01568, Pf04879	34875997	BRLA_c027110	BRLA_RS13175	Nitrogen metabolism; Microbial metabolism in diverse environments	1.359	0.64668
thiG	Thiazole synthase	29	6	27.4	5.11									1.354	0.647446
A0A177XP17	Delta-aminolevulinic acid dehydratase	24	5	36.3	5.34	metabolic process		catalytic activity;metal ion binding	Pf00490		AYJ08_09950			1.353	0.647446
A0A3E0RBV7	RNA-binding protein S1	30	5	14.9	9.6									1.352	0.647446
gcvPB	Probable glycine dehydrogenase (decarboxylating) subunit 2	13	7	53.8	5.39									1.352	0.647446
gcvPB	Probable glycine dehydrogenase (decarboxylating) subunit 2	9	5	55.7	6.49									1.352	0.647446
J3AHB6	S-adenosylmethionine:tRNA-ribosyltransferase-isomerase (Queuine synthetase) (Fragment)	6	1	17.9	6.07	metabolic process	cytoplasm	catalytic activity	Pf02547		PMI05_00849			1.35	0.834658
A0A0F6XYZ2	Fe-S cluster assembly protein SufD	33	9	47.8	5.39	cell organization and biogenesis;metabolic process			Pf01458					1.349	0.734984
A0A0F7C1N5	Toxin ETX	24	4	34.6	8.43				Pf03318					1.348	0.760809
motA	MotA/TolQ/ExbB proton channel family protein	4	1	28.7	5.67									1.347	0.796384
A0A2P7V0U7	Heme ABC transporter ATP-binding protein	5	3	56.2	5.9									1.345	0.659083
M8D9G8	Electron transfer flavoprotein beta subunit	24	4	27.4	4.73	metabolic process			Pf01012		I532_09052			1.345	0.760809
A0A177XR78	Aminotransferase	16	4	43.4	5.1	metabolic process		catalytic activity	Pf00155		AYJ08_20850			1.344	0.740821
A0A075R7L3	Thioredoxin reductase	45	10	34.9	5.15	metabolic process;response to stimulus	cytoplasm	antioxidant activity;catalytic activity;nucleotide binding	Pf00070, Pf00890, Pf01266, Pf01494, Pf01946, Pf03486, Pf07992, Pf12831, Pf13450, Pf13738	34877987	BRLA_c043180	BRLA_RS20840	Selenocompound metabolism; Pyrimidine metabolism	1.344	0.659083
bluB	BluB	6	1	24.6	5.64									1.343	0.796384
A0A075R3W4	Glycerol dehydrogenase	23	6	40.2	5.33	metabolic process		catalytic activity;metal ion binding	Pf00465, Pf13685	34877276	BRLA_c022330	gldA	Propanoate metabolism; Glycerolipid metabolism; Metabolic pathways	1.343	0.766524
pcp	Pyrrolidone-carboxylate peptidase	30	3	23.5	5.59									1.342	0.773012
A0A177XRG6	Uncharacterized protein	6	1	24.6	9.22		membrane		Pf13346		AYJ08_04795			1.342	0.802609
A0A0F6XZY3	Chemotaxis protein CheW	20	3	17.6	4.73	regulation of biological process;response to stimulus		signal transducer activity	Pf01584					1.342	0.659083
A0A0F7EE24	Peptide ligase	9	16	288.4	5.36	metabolic process		catalytic activity	Pf00501, Pf00550, Pf00668, Pf13193, Pf13745					1.341	0.801074
A0A075R1L1	NRPS-PKS domain-containing protein	12	18	199.7	5.52	metabolic process		catalytic activity	Pf00106, Pf00501, Pf00550, Pf00668, Pf01370, Pf08659, Pf13745	34876058	BRLA_c009550	BRLA_RS04695		1.341	0.659083
A0A075R0V0	Methionine import ATP-binding protein MetN	22	3	37.1	7.61	transport	membrane	catalytic activity;nucleotide binding;transporter activity	Pf00005, Pf09383, Pf13304, Pf13558		BRLA_c004070		ABC transporters	1.341	0.801074
rpmI	50S ribosomal protein L35	18	1	7.4	11.43									1.34	0.660737
deoA	Pyrimidine-nucleoside phosphorylase	38	12	46	4.83									1.339	0.663461
A0A0F7EJM5	Aminopyrimidine aminohydrolase	41	8	26.5	6.42	metabolic process		catalytic activity	Pf03070					1.338	0.668165
fliN	Flagellar motor switch protein FliN	13	4	49	4.37									1.337	0.676727
A0A075RAW4	Cystathionine gamma-lyase	34	11	40.8	6.16	metabolic process		catalytic activity	Pf00155, Pf00266, Pf01041, Pf01053, Pf01212, Pf03841, Pf06838	34877177	BRLA_c040910	BRLA_RS19750	Cysteine and methionine metabolism; Biosynthesis of amino acids; Biosynthesis of antibiotics; Metabolic pathways; Glycine, serine and threonine metabolism; Sulfur metabolism	1.336	0.673926
H0U5F3	Acetyltransferase family protein	19	6	39.3	6.39			catalytic activity	Pf00583, Pf13508, Pf13527		BLGI_583			1.334	0.682546
sdhB	Succinate dehydrogenase iron-sulfur subunit	14	3	27.8	8.09									1.334	0.802609
A0A177XIN7	Long-chain fatty acid--CoA ligase	8	4	55	6.44	metabolic process		catalytic activity	Pf00501, Pf13193		AYJ08_18145			1.33	0.717387
A0A177XMR7	HD-GYP domain-containing protein	5	2	42.7	7.02				Pf01966, Pf08668, Pf13487		AYJ08_08310			1.329	0.801074
A0A0F7EFB0	S-layer protein	26	33	147.5	6.64				Pf00395					1.329	0.796384
A0A0F7EEZ7	Molybdopterin molybdenumtransferase	8	2	36.3	5.57				Pf00994					1.328	0.806369
thiC	Phosphomethylpyrimidine synthase	48	23	65.9	5.96									1.327	0.709615
rpmB	50S ribosomal protein L28	26	2	6.9	12.31									1.327	0.711672
psuG	Pseudouridine-5'-phosphate glycosidase	18	4	33.1	5.31									1.326	0.794119
tmk	Thymidylate kinase	10	1	23.7	5.53									1.325	0.917873
glmS	Glutamine--fructose-6-phosphate aminotransferase [isomerizing]	14	8	67.1	5.19									1.322	0.719101
rph	Ribonuclease PH	12	2	27.9	5.52									1.321	0.81497
A0A075R4G2	Long-chain-fatty-acid--CoA ligase	21	7	56.2	5.64	metabolic process		catalytic activity	Pf00501, Pf13193		BRLA_c020350		Fatty acid metabolism; Quorum sensing; Fatty acid degradation; Fatty acid biosynthesis; Metabolic pathways	1.321	0.722677
A0A075R2S6	Asparagine synthetase 1	5	3	74.2	6.65	metabolic process		catalytic activity;nucleotide binding	Pf00310, Pf00733, Pf12481, Pf13522, Pf13537	34877504	BRLA_c013620	BRLA_RS06670	Metabolic pathways; Alanine, aspartate and glutamate metabolism; Biosynthesis of secondary metabolites	1.32	0.814649
A0A2S5HKX9	Amino acid ABC transporter substrate-binding protein	6	1	30.7	6.9									1.32	0.814649
A0A502HI41	Copper amine oxidase N-terminal domain-containing protein	17	9	73	8.7									1.318	0.735229
A0A177XMB7	Glyoxal reductase	9	2	31.7	5.53	metabolic process		catalytic activity	Pf00248		AYJ08_09390			1.318	0.814649
A0A075RGF1	PTS system EIICB-Glc	24	7	51.5	8.87	metabolic process;transport	membrane	catalytic activity;transporter activity	Pf00367, Pf02378	34875509	BRLA_c040280	BRLA_RS19445	Amino sugar and nucleotide sugar metabolism; Phosphotransferase system (PTS)	1.314	0.814649
yhfP	Putative quinone oxidoreductase YhfP	42	10	35.5	5.55									1.312	0.752547
gcvT	Aminomethyltransferase	33	9	39.6	5.31									1.312	0.752547
A0A0F7BYK5	Uncharacterized protein	12	3	31	6.84				Pf10977					1.311	0.801074
A0A177XH54	Surfactin synthase subunit 1	28	10	53.9	5.86				Pf00668, Pf13745		AYJ08_18250			1.31	0.806369
pdhA	Pyruvate dehydrogenase E1 component subunit alpha	49	13	38.7	5.5									1.307	0.762151
A0A0F7EJH5	Polyketide synthase	20	31	223.6	5.78	metabolic process		catalytic activity	Pf00106, Pf00107, Pf00108, Pf00109, Pf00550, Pf02801, Pf08240, Pf08241, Pf08242, Pf08659, Pf12847, Pf13489, Pf13561, Pf13602, Pf13847					1.306	0.788099
pfkA	ATP-dependent 6-phosphofructokinase	34	6	34.2	6.46									1.306	0.765728
A0A3M8C549	Fumarate hydratase class I	4	2	55.3	5.36									1.305	0.829593
A0A177XIS0	Threonine synthase	32	7	37.5	6.65	metabolic process		catalytic activity	Pf00291		AYJ08_18105			1.305	0.766524
A0A177XQY1	DNA-binding protein	25	9	48.4	6.9			DNA binding;protein binding	Pf01381, Pf12844, Pf13414, Pf13424, Pf13560		AYJ08_06245			1.304	0.766524
pdhA	Pyruvate dehydrogenase E1 component subunit alpha	11	3	40	5.27									1.303	0.801074
A0A3M8CY86	CsoR family transcriptional regulator	14	1	11.6	6.54									1.301	0.879713
V6M3B8	Copper-sensing transcriptional repressor CsoR	13	1	11.7	5.96	regulation of biological process		DNA binding;metal ion binding	Pf02583		T458_19715			1.301	0.879713
brvD	Brevibacillin synthetase D	8	31	520.5	5.2									1.301	0.834658
trpC	Indole-3-glycerol phosphate synthase	30	6	30.1	5.17									1.3	0.814649
nrdZ	Vitamin B12-dependent ribonucleotide reductase	4	3	95.5	5.36									1.298	0.836105
thiC	Phosphomethylpyrimidine synthase	55	30	65.9	6.21									1.298	0.786761
pdhB	Pyruvate dehydrogenase E1 component subunit beta	52	13	35.5	4.92									1.297	0.788099
A0A075R131	Glucokinase	19	3	32.9	4.91	metabolic process	cytoplasm	catalytic activity	Pf00370, Pf00480		BRLA_c005400		Biosynthesis of secondary metabolites; Metabolic pathways; Streptomycin biosynthesis; Biosynthesis of antibiotics; Glycolysis / Gluconeogenesis; Galactose metabolism; Starch and sucrose metabolism; Microbial metabolism in diverse environments; Amino sugar and nucleotide sugar metabolism; Carbon metabolism	1.297	0.814649
H0UFM5	Conserved domain protein	24	3	10.4	4.74	metabolic process			Pf00550		BLGI_4237			1.296	0.831456
A0A075R443	Acetyltransferase	7	1	15.9	5.85			catalytic activity	Pf00583, Pf13508, Pf13673	34876003	BRLA_c029800	BRLA_RS14465		1.296	0.917873
ddl	D-alanine--D-alanine ligase	23	8	42	4.84									1.296	0.842476
A0A0F7C1K6	Riboflavin biosynthesis protein RibD	7	2	41.6	8.15	metabolic process		catalytic activity;metal ion binding;nucleotide binding	Pf00383, Pf01872					1.296	0.814649
CUTC	Copper homeostasis protein CutC	5	1	24.8	6.34									1.295	0.839753
rplB	50S ribosomal protein L2	28	6	30.3	10.86									1.293	0.796384
rpoA	DNA-directed RNA polymerase subunit alpha	33	11	34.9	4.79									1.292	0.805038
A0A075R085	Tryptophan--tRNA ligase	33	8	37	7.33	metabolic process	cytoplasm	catalytic activity;nucleotide binding	Pf00579	34875108	BRLA_c017030	BRLA_RS08330	Aminoacyl-tRNA biosynthesis	1.292	0.798257
rpsU	30S ribosomal protein S21	14	1	6.8	11.44									1.29	0.801074
A0A075RHP6	UPF0340 protein BRLA_c044460	11	2	20.6	8.1				Pf04260	34877525	BRLA_c044460	BRLA_RS21480		1.29	0.855333
A0A2S5HTH8	ATP-dependent helicase	12	5	55.5	9.82									1.289	0.853115
rplK	50S ribosomal protein L11	50	8	14.9	9.66									1.288	0.855262
A0A3E0RE74	UPF0365 protein DF221_08205	26	6	35.8	5.29									1.288	0.917873
A0A502IHX2	Haloacid dehalogenase-like hydrolase	18	10	48.4	7.52									1.288	0.801074
A0A075R5Z1	Chemotaxis protein CheW	21	2	17.8	4.55	regulation of biological process;response to stimulus		signal transducer activity	Pf01584	34875836	BRLA_c037620	BRLA_RS18185	Bacterial chemotaxis; Two-component system	1.288	0.819282
H0U6X6	Amino acid adenylation domain protein	2	2	151.1	5.34	metabolic process		catalytic activity	Pf00501, Pf00550, Pf00668, Pf13193, Pf13745		BLGI_1129			1.286	0.868644
A0A075R4G4	PKS domain-containing protein	26	38	225.1	5.66	metabolic process		catalytic activity	Pf00106, Pf00107, Pf00108, Pf00109, Pf00550, Pf02801, Pf08240, Pf08241, Pf08242, Pf08659, Pf12847, Pf13489, Pf13561, Pf13602, Pf13847	34876736	BRLA_c020400	BRLA_RS09975		1.284	0.806369
bipA	50S ribosomal subunit assembly factor BipA	13	9	68.2	5.35									1.283	0.806369
A0A177XQV0	Two-component system response regulator	7	1	24.4	5.64	metabolic process;regulation of biological process;response to stimulus		DNA binding	Pf00072, Pf00196, Pf04545, Pf08281, Pf13384, Pf13518		AYJ08_03945			1.283	0.864382
A0A075R3V3	Dihydrolipoyl dehydrogenase	45	16	50	5.63	cellular homeostasis;metabolic process;regulation of biological process		catalytic activity;nucleotide binding	Pf00070, Pf00890, Pf01134, Pf02852, Pf03486, Pf07992, Pf12831	34877209	BRLA_c029030	BRLA_RS14105	Carbon metabolism; Pyruvate metabolism; Glyoxylate and dicarboxylate metabolism; Propanoate metabolism; Microbial metabolism in diverse environments; Biosynthesis of secondary metabolites; Glycine, serine and threonine metabolism; Citrate cycle (TCA cycle); Biosynthesis of antibiotics; Glycolysis / Gluconeogenesis; Metabolic pathways; Valine, leucine and isoleucine degradation	1.282	0.806369
A0A0F7EG56	MogA/MoaB family molybdenum cofactor biosynthesis protein	25	3	18.8	5.15	metabolic process			Pf00994					1.281	0.806369
A0A177XTQ5	Uncharacterized protein	13	2	23.7	4.84				Pf01865		AYJ08_19820			1.28	0.864382
H0UAH1	THUMP domain-containing protein	3	1	43.9	7.05	metabolic process		catalytic activity;RNA binding	Pf01170, Pf02926, Pf05175, Pf09445, Pf12847, Pf13659, Pf13847		BLGI_2391			1.278	0.925407
A0A2S5H978	L-cystine transporter	4	1	49.1	9.44									1.278	0.940861
A0A0F7EGB3	Peptidase S41	3	1	53	8.37	metabolic process		catalytic activity;protein binding	Pf00595, Pf01471, Pf03572, Pf13180					1.275	0.868644
mutS2	Endonuclease MutS2	4	3	88.1	6.61									1.275	0.865247
A0A177XRL3	Citrate synthase	22	6	40.2	6.47	metabolic process		catalytic activity	Pf00285		AYJ08_03970			1.275	0.879713
A0A0Q3WFP0	1-pyrroline-5-carboxylate dehydrogenase	22	6	56.5	5.83	metabolic process		catalytic activity	Pf00171, Pf05893, Pf13548		AN963_27800			1.275	0.844365
A0A0F6XZT9	DNA-binding protein	35	11	48.8	5.92			DNA binding;protein binding	Pf00515, Pf01381, Pf12844, Pf13414, Pf13424, Pf13432, Pf13560					1.274	0.814649
A0A075RAI2	PTS-dependent dihydroxyacetone kinase, dihydroxyacetone-binding subunit DhaK	6	2	63.3	5.54	metabolic process		catalytic activity	Pf02733, Pf02734	34878259	BRLA_c022340	BRLA_RS23155		1.273	0.87472
A0A2S5H8I1	Non-ribosomal peptide synthetase	10	35	520.3	5.19									1.273	0.814649
A0A2S5HZ63	ABC transporter ATP-binding protein	5	1	27.8	8.38									1.272	0.814649
A0A2S5HRR0	Copper amine oxidase	20	10	73.4	8.87									1.27	0.918259
A0A177XJ72	Glutamine synthetase I alpha	28	10	50.1	5.3	metabolic process	cytoplasm	catalytic activity	Pf00120, Pf03951		AYJ08_01505			1.269	0.819282
A0A075RA00	Tyrosine ammonia-lyase	28	13	60.9	5.69			catalytic activity	Pf00221	34876239	BRLA_c020440	BRLA_RS09995	Histidine metabolism; Metabolic pathways	1.268	0.819783
A0A2S5HRG9	Uncharacterized protein	11	2	22.8	6.16									1.267	0.879713
yvqK	Corrinoid adenosyltransferase	42	5	20.2	6.73									1.266	0.82642
argD	Acetylornithine aminotransferase	23	7	42.8	6.4									1.266	0.855403
rplE	50S ribosomal protein L5	28	7	20.2	9.6									1.266	0.829593
ylzA	Putative regulatory protein BLGI_2745	28	2	9.5	6.05									1.263	0.879713
ackA	Acetate kinase	28	13	64.2	6.46									1.262	0.834658
nosD	Nitrous oxide reductase family maturation protein NosD	12	4	50.6	6.25									1.261	0.864382
A0A385T6I7	Amino acid adenylation domain-containing protein	2	4	361	5.24									1.258	0.884862
rpsE	30S ribosomal protein S5	66	9	17.2	9.99									1.258	0.844365
A0A075RAF3	Trifunctional nucleotide phosphoesterase protein YfkN	4	3	85.4	6.6	metabolic process		catalytic activity;nucleotide binding	Pf00149, Pf02872, Pf08239, Pf09587	34875615	BRLA_c045500	BRLA_RS21990	Purine metabolism; Pyrimidine metabolism	1.257	0.864382
A0A177XG68	Zn-dependent hydrolase	36	14	53.1	5.35			catalytic activity	Pf00581, Pf00753		AYJ08_01760			1.257	0.953549
glpK	Glycerol kinase	25	8	55.7	5.21									1.257	0.848048
A0A502IS01	Threonine synthase	16	4	37.6	6.44									1.254	0.897961
A0A177XSI4	Acetolactate synthase	2	1	62.1	6.11	metabolic process		catalytic activity;metal ion binding;nucleotide binding	Pf00205, Pf00676, Pf02775, Pf02776		AYJ08_02690			1.254	0.939453
H0U8Z5	Uncharacterized protein	36	12	50.7	6.67	cell organization and biogenesis			Pf03775, Pf03961		BLGI_1863			1.252	0.853642
pflB	Formate acetyltransferase	36	25	84.9	6.28									1.251	0.879713
A0A0F7C188	Diguanylate cyclase	8	2	33.5	9.36	transport	membrane		Pf00528, Pf12911					1.251	0.857744
yufP	Branched-chain amino acid transport system / permease component family protein	15	3	38.3	9.51									1.248	0.892403
tpx	Thiol peroxidase	42	5	18.6	5.35									1.244	0.864392
fliL	Flagellar protein FliL	42	6	16.4	6.8									1.244	0.864573
ftsA	Cell division protein FtsA	25	6	45.1	5.03									1.243	0.867265
A0A2S5H7R6	Asp23/Gls24 family envelope stress response protein	38	5	15.4	4.97									1.243	0.867734
pepA	Probable cytosol aminopeptidase	11	4	54.1	5.41									1.24	0.910388
pyrG	CTP synthase	20	6	59.2	5.88									1.239	0.876684
A0A502J1E7	Nicotinate phosphoribosyltransferase	14	5	54.7	6.09									1.237	0.917873
clpP	ATP-dependent Clp protease proteolytic subunit	48	6	21.2	4.89									1.235	0.879713
nuoH	NADH-quinone oxidoreductase subunit H	4	1	37.4	8.81									1.235	0.918259
A0A0F7C003	Aminotransferase	5	1	43.4	5.14	metabolic process		catalytic activity	Pf00155, Pf00266, Pf01041, Pf01053, Pf01212, Pf01276					1.235	0.917873
pckA	Phosphoenolpyruvate carboxykinase (ATP)	51	18	57.6	5.94									1.234	0.880372
rplV	50S ribosomal protein L22	19	3	12.3	11.22									1.234	0.88081
A0A177XIH5	Nucleotide-binding protein AYJ08_19320	4	1	33.4	7.53			nucleotide binding	Pf03668, Pf13238, Pf13521, Pf13671		AYJ08_19320			1.233	0.920423
H0UBL7	Cache domain protein	20	11	75.5	5.06	regulation of biological process;response to stimulus	membrane	signal transducer activity	Pf00015, Pf00672, Pf02743, Pf05667		BLGI_2790			1.233	0.883488
fusA	Elongation factor G	72	41	76.2	5.14									1.233	0.883488
A0A177XJ73	L-serine dehydratase	4	1	31	5.11	metabolic process		catalytic activity	Pf03313		AYJ08_15085			1.232	0.920423
mutM	Formamidopyrimidine-DNA glycosylase	12	1	31.1	8.41									1.231	0.992518
A0A177XIJ8	Glycosyl hydrolase	4	2	67	7.43	metabolic process	membrane	catalytic activity	Pf00704, Pf07833, Pf08239		AYJ08_01030			1.23	0.923213
A0A177XG58	Serine protease	16	1	18	5.03	metabolic process	membrane	catalytic activity			AYJ08_01705			1.229	0.992518
lacD	Tagatose 1,6-diphosphate aldolase	6	1	37.4	5.12									1.229	0.945248
ribE	Riboflavin synthase, alpha subunit	11	2	23.9	7.18									1.229	0.923213
A0A177XTI3	Ferredoxin	23	6	37.2	6.71	metabolic process		catalytic activity	Pf00037, Pf01558, Pf12837, Pf12838, Pf13183, Pf13187, Pf13237, Pf13484, Pf13534, Pf13746, Pf14697		AYJ08_02315			1.229	0.897961
pksN	Polyketide synthase PksN domain protein	20	34	250.1	6.09									1.228	0.897961
A0A4Y3PDJ8	Glycine cleavage system H protein	10	1	14.1	4.16									1.226	0.897961
der	GTPase Der	5	2	48.9	5.95									1.225	0.928506
A0A075R0S3	Glutamate dehydrogenase	36	13	47.3	5.55	metabolic process		catalytic activity	Pf00208, Pf02812		BRLA_c018650		Taurine and hypotaurine metabolism; Alanine, aspartate and glutamate metabolism; Arginine biosynthesis; Nitrogen metabolism; Metabolic pathways	1.224	0.937149
H0UBL8	Phosphoserine phosphatase	44	22	48.6	8.79				Pf12710		BLGI_2791			1.222	0.905303
engB	Probable GTP-binding protein EngB	10	2	23.8	9.36									1.222	0.939301
rpsK	30S ribosomal protein S11	68	7	14.3	11.68									1.221	0.9117
A0A075R9G7	ABC-type transport system, periplasmic binding protein	55	13	35.6	5.36				Pf04392, Pf13407	34877239	BRLA_c042490	BRLA_RS20500		1.218	0.917873
ytnP	Putative quorum-quenching lactonase YtnP	20	4	32.5	6.34									1.217	0.923213
rplE	50S ribosomal protein L5	67	13	20.2	9.7									1.217	0.917873
A0A4Y3PL88	3-phosphoshikimate 1-carboxyvinyltransferase	2	1	45.1	5.73									1.216	0.921122
nadE	NH(3)-dependent NAD(+) synthetase	19	3	30.8	5.44									1.216	0.928506
A0A177XP94	Uncharacterized protein	3	1	40.1	9.58		membrane				AYJ08_08655			1.214	0.940861
A0A075RC14	Agmatinase	19	5	32.6	5.21			catalytic activity;metal ion binding	Pf00491	34875864	BRLA_c044790	BRLA_RS21645	Metabolic pathways; Arginine and proline metabolism	1.213	0.917873
A0A075R3Q1	DNA topoisomerase (ATP-hydrolyzing)	2	1	73.6	6.58	metabolic process	chromosome	catalytic activity;DNA binding;nucleotide binding	Pf00204, Pf00986, Pf01751, Pf02518	34879112	BRLA_c028480	BRLA_RS13860		1.213	0.939902
A0A075QXY0	Phosphoenolpyruvate-protein phosphotransferase	33	16	63.9	4.91	metabolic process;transport	cytoplasm	catalytic activity;metal ion binding	Pf00391, Pf02896, Pf05524	34875176	BRLA_c008660	BRLA_RS04255	Phosphotransferase system (PTS)	1.213	0.917873
A0A0F7C049	Bacteriocin	41	9	31.4	5.31	defense response;metabolic process;response to stimulus		catalytic activity	Pf04454					1.213	0.917873
rpsP	30S ribosomal protein S16	55	3	10.1	10.14									1.213	0.917873
ddl	D-alanine--D-alanine ligase	23	8	42	4.84									1.212	0.917873
A0A075R5C1	Stage 0 sporulation protein KA	30	13	60.1	5.57	transport			Pf00496	34877974	BRLA_c004140	BRLA_RS02050	Quorum sensing; beta-Lactam resistance; ABC transporters	1.211	0.918259
H0U6J8	TPR_REGION domain-containing protein	2	1	41.4	8.98			protein binding	Pf02698, Pf13414, Pf13432		BLGI_988			1.21	0.980206
H0U5V9	Uncharacterized protein	21	8	59.2	5.15	metabolic process		catalytic activity	Pf12831		BLGI_740			1.208	0.925533
A0A2S5HRZ5	Flagellin	65	26	40.2	5.82									1.208	0.926263
A0A075QZI6	Uncharacterized protein	21	2	14.9	8.7				Pf13115		BRLA_c006410			1.208	0.928506
A0A075R6U1	Aspartate ammonia-lyase	21	7	55.4	5.38	metabolic process		catalytic activity	Pf00206, Pf10415		BRLA_c040450		Metabolic pathways; Alanine, aspartate and glutamate metabolism	1.206	0.931356
pksL	Polyketide synthase PksL	17	47	386.2	6.14									1.205	0.934833
A0A177XP68	D-3-phosphoglycerate dehydrogenase	16	5	57.5	5.96	metabolic process		catalytic activity;nucleotide binding	Pf00389, Pf01842, Pf02826		AYJ08_05515			1.204	0.939453
H0UBR9	Uncharacterized protein	2	1	47.8	5.2						BLGI_2842			1.204	0.94881
tuf	Elongation factor Tu	73	22	43.3	5.08									1.204	0.937123
A0A177XRK8	Cell surface protein	61	99	121.7	5.52				Pf00395		AYJ08_03175			1.204	0.937149
A0A385T8M0	Uncharacterized protein	6	1	15.8	4.55									1.203	0.939453
cheY	Chemotaxis protein CheY homolog	30	3	13.1	5.27									1.203	0.951484
H0U7I7	Thiamine_BP domain-containing protein	93	6	10.6	4.75				Pf01910		BLGI_1345			1.203	0.939301
rpsR	30S ribosomal protein S18	39	5	8.9	10.92									1.203	0.939301
A0A075R183	Putative sporulation-specific glycosylase YdhD	23	7	45.1	8.5	metabolic process		catalytic activity	Pf00704, Pf07833	34876324	BRLA_c006150	BRLA_RS03040		1.203	0.939453
A0A0F7C0Y0	GTPase	3	1	42.1	8.21			catalytic activity;nucleotide binding	Pf00009, Pf01926, Pf02421, Pf03193					1.203	0.94881
valS	Valine--tRNA ligase	19	12	101.8	5.36									1.203	0.950608
A0A3E0R8P0	TetR family transcriptional regulator	3	1	26.4	7.55									1.202	0.990005
A0A3E0RFV3	Bifunctional cystathionine gamma-lyase/homocysteine desulfhydrase	6	2	40.7	6.42									1.202	0.953549
surE	5'-nucleotidase SurE	20	4	29	5.36									1.202	0.939453
A0A2S5H822	Gluconeogenesis factor	6	1	35.9	5									1.202	0.994852
polA	DNA polymerase I	6	4	100.8	5.16									1.202	0.939453
fliB	Flagellin	66	27	42.2	6.35									1.202	0.939453
trpB	Tryptophan synthase beta chain	53	15	44.2	5.97									1.201	0.939453
A0A2S5I5D2	Histidine kinase	2	1	70.7	6.68									1.201	0.994852
H0UDQ3	Copper amine oxidase N-terminal domain protein	4	1	23.5	9.04				Pf07833		BLGI_3547			1.2	0.952975
A0A075R7H6	Uncharacterized protein	3	1	49.8	4.78			protein binding		34877250	BRLA_c042870	BRLA_RS20685		1.2	0.994852
A0A0F7EG64	RpiR family transcriptional regulator	4	1	31.9	8.85	metabolic process;regulation of biological process		DNA binding	Pf01380, Pf01418, Pf13580					1.199	0.966817
A0A177XGK7	NAD(P)H nitroreductase	4	1	23.3	6.7	metabolic process		catalytic activity	Pf00881		AYJ08_18355			1.199	0.953549
btD	Nonribosomal peptide synthetase D	15	31	289.1	5.14									1.198	0.939453
rbsA	ABC transporter family protein	18	9	56.4	6.29									1.197	0.939453
gpmI	2,3-bisphosphoglycerate-independent phosphoglycerate mutase	19	7	56.8	5.16									1.195	0.940861
secA	Protein translocase subunit SecA	26	19	93.6	5.52									1.195	0.940363
A0A075R7L4	Arginine decarboxylase	8	3	53.6	5.82	metabolic process		catalytic activity	Pf00155, Pf00266, Pf00464, Pf01041, Pf01053, Pf01212, Pf01276, Pf03711, Pf05889	34878842	BRLA_c035470	BRLA_RS17155		1.194	0.957546
A0A177XPH1	Non-ribosomal peptide synthetase	9	18	288	5.31	metabolic process		catalytic activity	Pf00501, Pf00550, Pf00668, Pf13193, Pf13745		AYJ08_08250			1.194	0.940861
A0A075R9W7	Putative aminopeptidase YsdC	19	7	39.6	6.2	metabolic process		catalytic activity;metal ion binding	Pf05343	34876006	BRLA_c038930	BRLA_RS18790		1.194	0.940861
hisC	Histidinol-phosphate aminotransferase	35	10	40.6	5.48									1.193	0.940861
A0A502IL65	ABC transporter ATP-binding protein	4	2	58.9	5.24									1.193	0.961001
A0A075R135	Uncharacterized protein	6	1	28.1	5.85			nucleotide binding	Pf07238		BRLA_c012590			1.192	0.986095
A0A0F7C0B2	Peptidase M28	10	2	39.4	5.39	metabolic process		catalytic activity;metal ion binding	Pf05343					1.191	0.94881
A0A3M8DKD7	MarR family transcriptional regulator	5	1	17.1	5.66									1.189	0.953549
A0A075R7R0	Dihydrolipoamide acetyltransferase component of pyruvate dehydrogenase complex	52	17	46.3	5.54	metabolic process		catalytic activity	Pf00198, Pf00364, Pf02817	34877176	BRLA_c029040	BRLA_RS14110	Biosynthesis of antibiotics; Biosynthesis of secondary metabolites; Glycolysis / Gluconeogenesis; Citrate cycle (TCA cycle); Microbial metabolism in diverse environments; Carbon metabolism; Metabolic pathways; Pyruvate metabolism	1.189	0.94881
mtnA	Methylthioribose-1-phosphate isomerase	24	6	38.6	4.91									1.189	0.94881
A0A075R705	Diaminobutyrate--2-oxoglutarate transaminase	9	3	47.5	6.54	metabolic process		catalytic activity	Pf00155, Pf00202	34877723	BRLA_c026490	BRLA_RS12860	Biosynthesis of amino acids; Glycine, serine and threonine metabolism; 2-Oxocarboxylic acid metabolism; Microbial metabolism in diverse environments; Metabolic pathways	1.189	0.953549
rpsL	30S ribosomal protein S12	26	4	16.1	11.39									1.189	0.94881
A0A0F7EFL8	Proline dehydrogenase	16	5	35.1	7.08	metabolic process		catalytic activity;nucleotide binding	Pf01619					1.188	0.95009
pabA	Glutamine amidotransferase of anthranilate synthase/aminodeoxychorismate synthase family protein	48	6	22.1	5.55									1.187	0.953241
A0A0F7EGQ0	Cytochrome C-551	66	8	12	6.09	metabolic process		metal ion binding	Pf00034, Pf10643, Pf13442					1.187	0.953549
gcvT	Aminomethyltransferase	31	9	40.5	5.25									1.186	0.953549
H0U5F7	UbiA prenyltransferase family protein	4	1	35.2	9.22		membrane	catalytic activity	Pf01040		BLGI_587			1.185	0.976199
ispH	4-hydroxy-3-methylbut-2-enyl diphosphate reductase	9	2	35.2	6.48									1.185	0.994852
A0A075R713	Purine nucleoside receptor A	46	11	36.6	6.6		membrane		Pf02608, Pf13407	34875813	BRLA_c041200	BRLA_RS19890		1.184	0.953549
rplC	50S ribosomal protein L3	59	11	22.3	9.82									1.184	0.953549
ftsE	Cell division ATP-binding protein FtsE	18	4	25.8	9.19									1.183	0.980206
A0A075RBW1	Tubulin-like protein	18	13	129.5	5.44		membrane	catalytic activity	Pf13809	34877367	BRLA_c045970	BRLA_RS22215		1.183	0.954013
A0A2S5HHE6	CoA transferase subunit B	12	2	23.1	4.94									1.182	0.994852
flot	SPFH domain / Band 7 family protein	58	28	57.3	5.21									1.182	0.95514
A0A075R537	NRPS/PKS domain-containing protein	1	2	485.4	5.49	metabolic process		catalytic activity	Pf00108, Pf00109, Pf00202, Pf00501, Pf00550, Pf00668, Pf02801, Pf13193, Pf13745	34878025	BRLA_c026450	BRLA_RS12840		1.182	0.978052
A0A075R0U7	Putative acetyltransferase	3	1	30.8	5.22			catalytic activity	Pf00583, Pf08445, Pf13508, Pf13527	34878777	BRLA_c011690	BRLA_RS05735		1.182	0.978052
A0A075R7L0	NADH(P)-binding protein	11	3	34.8	4.86			catalytic activity	Pf01370, Pf13460	34876566	BRLA_c012300	BRLA_RS06040		1.18	0.967184
A0A518V859	U32 family peptidase	12	3	35.2	4.89									1.179	0.980206
trpF	N-(5'-phosphoribosyl)anthranilate isomerase	18	3	25.6	7.02									1.179	0.994852
pruA	L-glutamate gamma-semialdehyde dehydrogenase	20	7	56.8	5.8									1.178	0.974317
A0A177XK38	Peptidase M42	13	3	37.8	5.74	metabolic process		catalytic activity;metal ion binding	Pf05343		AYJ08_01060			1.178	0.994852
bluB	5,6-dimethylbenzimidazole synthase	6	1	24.6	6.4									1.178	0.992518
A0A0F7BYI9	NADH dehydrogenase	6	2	39.3	6.14	metabolic process		catalytic activity	Pf07992					1.176	0.970547
A0A177XQP3	1-acyl-sn-glycerol-3-phosphate acyltransferase	8	1	22.2	9.54	metabolic process	membrane	catalytic activity	Pf01553, Pf03279		AYJ08_05610			1.176	0.994852
pepS	Aminopeptidase PepS	43	12	42	5.16									1.176	0.975799
A0A075R6P5	Pyruvate kinase	41	18	61.9	5.4	metabolic process		catalytic activity;metal ion binding	Pf00224, Pf00391, Pf02887	34876624	BRLA_c009090	BRLA_RS04465	Carbon metabolism; Biosynthesis of amino acids; Microbial metabolism in diverse environments; Metabolic pathways; Pyruvate metabolism; Purine metabolism; Biosynthesis of antibiotics; Glycolysis / Gluconeogenesis; Biosynthesis of secondary metabolites	1.175	0.978052
sucC	Succinate--CoA ligase [ADP-forming] subunit beta	71	27	41.4	5.16									1.175	0.978052
A0A075R7D8	Cytochrome c oxidase subunit 1	4	2	62.1	9.5	metabolic process;transport	membrane	catalytic activity;metal ion binding;transporter activity	Pf00115	34876576	BRLA_c027940	BRLA_RS13600	Metabolic pathways; Oxidative phosphorylation	1.174	0.982471
prfB	Peptide chain release factor 2	7	2	41.9	5.16									1.174	0.994852
tycA	Tyrocidine non-ribosomal peptide synthetase TycA	2	2	124.4	5.53									1.174	0.992518
trpD	Anthranilate phosphoribosyltransferase	2	1	36	5.73									1.174	0.967773
A0A075R5M7	Endo-1,4-beta-xylanase A	40	45	147	6.39	metabolic process		catalytic activity	Pf00395	34875052	BRLA_c036000	BRLA_RS17405		1.174	0.978052
A0A177XS56	ABC transporter substrate-binding protein	44	21	61.1	5.81	transport			Pf00496		AYJ08_04105			1.173	0.978052
A0A177XLW3	Pyruvate kinase	40	17	62	5.47	metabolic process		catalytic activity;metal ion binding	Pf00224, Pf00391, Pf02887		AYJ08_09115			1.172	0.999809
A0A177XPV3	Alanine dehydrogenase	57	16	39.5	6.24	metabolic process		catalytic activity	Pf01262, Pf02882, Pf05222		AYJ08_07405			1.172	0.978114
engD	Ribosome-binding ATPase YchF	28	7	40	5.05									1.172	0.979785
tig	Trigger factor	49	17	48.1	4.67									1.172	0.979785
A0A3M8CVP8	DEAD/DEAH box helicase	2	1	65	10.18									1.171	0.994852
rplO	50S ribosomal protein L15	53	7	15.5	10.65									1.171	0.981038
dapD	2,3,4,5-tetrahydropyridine-2,6-dicarboxylate N-acetyltransferase	9	2	24.9	5.44									1.17	0.981953
nasE	Rieske [2Fe-2S] domain protein	22	3	13.3	4.64									1.17	0.983326
pruA	Delta-1-pyrroline-5-carboxylate dehydrogenase, putative	60	22	56.7	5.68									1.17	0.983761
hom	Homoserine dehydrogenase	33	11	48.1	6.01									1.169	0.986095
hemL	Glutamate-1-semialdehyde 2,1-aminomutase	27	10	50.5	6.37									1.169	0.987301
A0A518VAQ5	Uncharacterized protein	10	1	14.7	6.64									1.169	0.994852
A0A517I1A8	HAMP domain-containing protein	2	1	63.5	5.02									1.168	0.994852
A0A177XMQ3	Histidine kinase	2	1	57.2	5.26	metabolic process;regulation of biological process;response to stimulus	membrane	catalytic activity;protein binding;receptor activity;signal transducer activity	Pf00015, Pf00989, Pf08447, Pf08448, Pf13426		AYJ08_11145			1.168	0.994852
A0A2S5GZL1	Flagellin	55	23	40.7	5.97									1.168	0.994852
accD	Acetyl-coenzyme A carboxylase carboxyl transferase subunit beta	4	1	32.5	6.86									1.167	0.994852
A0A177XQL7	Mangotoxin biosynthesis-involved protein MgoB	23	4	28.3	4.96				Pf11251, Pf14518		AYJ08_06695			1.167	0.980206
atpH	ATP synthase subunit delta	45	6	19.7	5.92									1.166	0.999809
eno	Enolase	64	18	46	4.93									1.166	0.994852
asnS	Asparagine--tRNA ligase	32	12	49.2	5.72									1.165	0.994852
rplF	50S ribosomal protein L6	47	7	19.3	10.08									1.165	0.994852
purA	Adenylosuccinate synthetase	62	16	47.3	6.1									1.164	0.994852
A0A0F7EEY9	Iron ABC transporter ATP-binding protein	34	7	29	4.89	transport		catalytic activity;nucleotide binding	Pf00005, Pf13304, Pf13481					1.163	0.994852
A0A075RI20	2,5-dihydroxypyridine 5,6-dioxygenase	17	5	33.1	5.01	metabolic process		catalytic activity	Pf02073	34875699	BRLA_c045310	BRLA_RS21905		1.163	0.994852
A0A075R7K6	Uroporphyrinogen III methylase	14	4	55.1	5.1	metabolic process		catalytic activity;nucleotide binding	Pf00590, Pf02602	34878742	BRLA_c012250	BRLA_RS06015	Metabolic pathways; Porphyrin and chlorophyll metabolism; Biosynthesis of secondary metabolites	1.162	0.994852
valS	Valine--tRNA ligase	20	13	101.8	5.29									1.162	0.994852
A0A075R8G7	Ribosomal-protein-alanine acetyltransferase RimI	13	3	30.7	5.26			catalytic activity	Pf00583, Pf08445, Pf13508, Pf13527, Pf13673, Pf13718	34878258	BRLA_c015170	BRLA_RS07430		1.161	0.994852
alaS	Alanine--tRNA ligase	28	17	97.1	5.07									1.161	0.994852
A0A518VB33	Uncharacterized protein	4	1	26.3	5.17									1.16	0.994852
polA	DNA polymerase I	3	2	98.8	5.41									1.16	0.994852
H0UFM9	Phosphopantetheine attachment site family protein	25	36	225.4	5.66	metabolic process		catalytic activity	Pf00106, Pf00107, Pf00108, Pf00109, Pf00550, Pf02801, Pf08240, Pf08241, Pf08242, Pf08659, Pf12847, Pf13489, Pf13561, Pf13602, Pf13847		BLGI_4241			1.16	0.994852
cysK	Cysteine synthase	51	8	32.9	5.05									1.16	0.994852
rplU	50S ribosomal protein L21	57	5	11.3	9.79									1.16	0.994852
A0A075R2G1	Putative amino acid permease YhdG	3	1	50.3	8.91	transport	membrane	transporter activity	Pf00324, Pf13520, Pf13906	34877761	BRLA_c010580	BRLA_RS05180		1.16	0.994852
A0A2S5HHX4	Radical SAM protein	31	12	49.3	7.09									1.159	0.994852
lon	Lon protease	17	10	87.7	6.19									1.159	0.994852
tuf	Elongation factor Tu	81	25	43.3	5.05									1.158	0.994852
hprK	HPr kinase/phosphorylase	5	1	34.5	6.28									1.158	0.994852
H0UDT1	Uncharacterized protein	21	3	21.2	8.95		membrane				BLGI_3575			1.158	0.994852
gcvPB	Probable glycine dehydrogenase (decarboxylating) subunit 2	35	14	53.9	5.63									1.157	0.994852
A0A075R9E7	Nitronate monooxygenase	8	2	34.7	5.99	metabolic process		catalytic activity	Pf03060	34875541	BRLA_c035460	BRLA_RS17150		1.157	0.994852
rplQ	50S ribosomal protein L17	40	6	13.6	10.11									1.157	0.994852
A0A2S5I5Y1	Flagellin	67	28	40.1	7.08									1.157	0.994852
A0A075R7J3	Glyceraldehyde-3-phosphate dehydrogenase	50	16	35.8	6.25	metabolic process		catalytic activity;nucleotide binding	Pf00044, Pf01113, Pf02800	34877823	BRLA_c043020	BRLA_RS20760	Microbial metabolism in diverse environments; Biosynthesis of secondary metabolites; Carbon metabolism; Metabolic pathways; Biosynthesis of amino acids; Biosynthesis of antibiotics; Glycolysis / Gluconeogenesis	1.157	0.994852
A0A075R030	DEAD-box ATP-dependent RNA helicase CshA	27	11	56.3	9.48	metabolic process	cytoplasm;nucleus	catalytic activity;nucleotide binding;RNA binding	Pf00270, Pf00271, Pf06862	34877145	BRLA_c008780	BRLA_RS04310	RNA degradation	1.156	0.994852
mqnE	Aminodeoxyfutalosine synthase	15	4	41.2	6.16									1.155	0.994852
gatA	Glutamyl-tRNA(Gln) amidotransferase subunit A	34	12	53.2	5.02									1.154	0.994852
A0A075R9V2	Methyl-accepting chemotaxis protein McpB	27	14	73	5.31	regulation of biological process;response to stimulus	membrane	signal transducer activity	Pf00015, Pf00672, Pf02743	34878215	BRLA_c037430	BRLA_RS18095	Bacterial chemotaxis; Two-component system	1.154	0.994852
atpA	ATP synthase subunit alpha	24	11	54.9	5.88									1.153	0.994852
fhs	Formate--tetrahydrofolate ligase	26	11	58.1	6.27									1.153	0.994852
nusG	Transcription termination/antitermination protein NusG	46	6	20.4	5.06									1.153	0.994852
hemC	Porphobilinogen deaminase	20	3	34.6	5.99									1.152	0.994852
H0U3U2	Siroheme decarboxylase	42	13	40.1	6.29	regulation of biological process		DNA binding	Pf13404		BLGI_7			1.151	0.994852
A0A075R706	Putative bifunctional phosphatase/peptidyl-prolyl cis-trans isomerase	10	2	29.4	5.36			catalytic activity	Pf00702, Pf05116, Pf08282, Pf13344	34875084	BRLA_c010300	BRLA_RS05040		1.151	0.994852
tyrS	Tyrosine--tRNA ligase	24	9	48	5.4									1.151	0.994852
A0A075R5D6	Flagellin	59	26	42.2	6.23	cellular component movement	extracellular	structural molecule activity	Pf00669, Pf00700	34878611	BRLA_c020670	BRLA_RS10105	Two-component system; Flagellar assembly	1.15	0.998804
A0A075RI97	Methyl-accepting chemotaxis protein McpB	14	7	63.5	4.73	regulation of biological process;response to stimulus	membrane	signal transducer activity	Pf00015, Pf00672, Pf12729	34877315	BRLA_c046020	BRLA_RS22235	Bacterial chemotaxis; Two-component system	1.15	0.994852
thiI	Probable tRNA sulfurtransferase	5	2	45.5	7.52									1.15	0.994852
A0A177XK88	Manganese ABC transporter ATP-binding protein	31	7	29.3	8.06			catalytic activity;nucleotide binding	Pf00005, Pf13207, Pf13304, Pf13476, Pf13555, Pf13558		AYJ08_13120			1.149	0.994852
frr	Ribosome-recycling factor	16	2	20.7	8.27									1.149	0.994852
A0A075R7Q2	Endonuclease YhcR	10	7	111.6	5.44	metabolic process		catalytic activity	Pf00565, Pf01336		BRLA_c035970			1.149	0.994852
gcvPA	Probable glycine dehydrogenase (decarboxylating) subunit 1	37	12	49.5	5.2									1.149	0.994852
V6M6F7	Hydrolase	2	1	65	5.92			catalytic activity	Pf01979, Pf07969, Pf13147, Pf13594		T458_12245			1.148	0.994852
A0A075R4J8	Uncharacterized protein	5	1	68.4	6.01				Pf09343	34875878	BRLA_c020850	BRLA_RS10195		1.147	0.999809
fabG1	Short chain dehydrogenase family protein	47	8	25.4	5.66									1.146	0.994852
deoD	Purine nucleoside phosphorylase DeoD-type	48	10	25.8	5.47									1.146	0.994852
upp	Uracil phosphoribosyltransferase	23	4	22.9	5.66									1.146	0.994852
A0A075R0B6	Methylmalonyl-CoA mutase	20	8	61.5	5.59	metabolic process		catalytic activity	Pf01642	34878163	BRLA_c017280	BRLA_RS08450	Microbial metabolism in diverse environments; Metabolic pathways; Glyoxylate and dicarboxylate metabolism; Propanoate metabolism; Valine, leucine and isoleucine degradation; Carbon metabolism	1.145	0.994852
recA	Protein RecA	28	7	37.8	5.25									1.145	0.994852
trpA	Tryptophan synthase alpha chain	68	11	29.7	5.31									1.145	0.994852
H0UBY6	Uncharacterized protein	21	2	12.8	6.07						BLGI_2909			1.145	0.994852
rplD	50S ribosomal protein L4	27	4	22.4	10.04									1.144	0.994852
aroA	Protein AroA	55	14	40.7	5.81									1.144	0.994852
glnS	Glutamine--tRNA ligase	25	13	64.4	5.47									1.143	0.994852
A0A177XQC6	C-di-GMP phosphodiesterase	5	1	41.1	7.06				Pf01966, Pf08668, Pf13487		AYJ08_07780			1.143	0.999809
ahcY	Adenosylhomocysteinase	67	28	46.4	5.3									1.143	0.994852
rplV	50S ribosomal protein L22	20	3	12.3	10.83									1.142	0.994852
A0A075R6W2	D-alanyl-D-alanine carboxypeptidase	10	2	30.8	5.52	metabolic process		catalytic activity	Pf02557	34878637	BRLA_c025990	BRLA_RS12605	Vancomycin resistance; Peptidoglycan biosynthesis; Two-component system	1.142	0.994852
codY	GTP-sensing transcriptional pleiotropic repressor CodY	36	8	28.6	5.6									1.142	0.994852
A0A1I3LTT8	ADP-ribosylglycohydrolase	3	1	33.8	5.83									1.142	0.994852
rplB	50S ribosomal protein L2	63	15	30.3	10.73									1.142	0.994852
A0A075R596	Citrate synthase	25	7	40.2	6.33	metabolic process		catalytic activity	Pf00285	34878471	BRLA_c003840	BRLA_RS01905	Biosynthesis of antibiotics; 2-Oxocarboxylic acid metabolism; Metabolic pathways; Citrate cycle (TCA cycle); Glyoxylate and dicarboxylate metabolism; Carbon metabolism; Biosynthesis of secondary metabolites; Biosynthesis of amino acids; Microbial metabolism in diverse environments	1.141	0.994852
thiO	Glycine oxidase ThiO	18	6	40.8	7.11									1.141	0.994852
A0A177XK99	Glycine oxidase	14	4	40.9	7.06	metabolic process		catalytic activity;nucleotide binding	Pf00890, Pf01266, Pf03486, Pf07992		AYJ08_01440			1.141	0.999809
A0A0F7EEX8	2-ketogluconate reductase	8	2	35.2	5.24	metabolic process		catalytic activity;nucleotide binding	Pf00389, Pf02826, Pf03807					1.141	0.999809
A0A075R2M8	Uncharacterized protein	3	1	51.9	6.3					34878472	BRLA_c011230	BRLA_RS05505		1.141	0.999809
A0A177XL90	Non-ribosomal peptide synthetase	1	4	440.3	5.35	metabolic process		catalytic activity	Pf00106, Pf00501, Pf00550, Pf00668, Pf08659, Pf13193, Pf13745		AYJ08_13390			1.14	0.996535
A0A0F7EEF8	Penicillin-binding protein	2	1	89.5	8.91		membrane		Pf00905, Pf03717					1.14	0.999809
A0A075RBU2	NRPS domain-containing protein	2	2	141.9	5.36	metabolic process		catalytic activity	Pf00501, Pf00550, Pf00668, Pf13193	34875226	BRLA_c026510	BRLA_RS12870		1.139	0.994852
sucC	Succinate--CoA ligase [ADP-forming] subunit beta	66	24	41.5	5.22									1.139	0.999809
H0UFN1	Phosphopantetheine attachment site family protein	4	4	144.6	5.9				Pf00106, Pf00550, Pf00561, Pf08659, Pf12695, Pf12697, Pf14765		BLGI_4243			1.139	0.999809
A0A0F7EGW3	Uncharacterized protein	11	1	14.4	5.74									1.139	0.998804
A0A177XK22	Virulence factor	12	4	42.4	4.92	transport			Pf01602, Pf08712, Pf12717, Pf13646, Pf13769		AYJ08_13345			1.139	0.994852
A0A0F7C0K3	Chemotaxis protein CheA	30	18	75.7	4.89	cellular component movement;metabolic process;regulation of biological process;response to stimulus	cytoplasm	catalytic activity;nucleotide binding;receptor activity;signal transducer activity	Pf01584, Pf01627, Pf02518, Pf02895, Pf07194					1.137	0.999809
A0A177XLD1	NAD(P)H nitroreductase	7	1	23.3	6.21	metabolic process		catalytic activity	Pf00881		AYJ08_11125			1.137	0.999809
A0A4Y3PHQ6	Serine hydroxymethyltransferase	4	1	44.9	6.54									1.134	0.999809
H0U6R2	Phage integrase, N-terminal SAM-like domain protein	19	9	76.8	5.91						BLGI_1052			1.133	0.999809
metK	S-adenosylmethionine synthase	40	14	43.5	5.45									1.132	0.999809
A0A3E0RDF7	Branched-chain amino acid ABC transporter permease	4	1	37.5	9.32									1.131	0.994852
rpoA	DNA-directed RNA polymerase subunit alpha	47	15	34.9	4.77									1.131	0.999809
H0U439	Nucleotide sugar dehydrogenase family protein	24	9	47.1	5.72	metabolic process		catalytic activity;nucleotide binding	Pf00984, Pf02737, Pf03720, Pf03721		BLGI_104			1.131	0.999809
A0A075RII1	L-2,4-diaminobutyrate decarboxylase	3	2	62.1	6.37	metabolic process		catalytic activity	Pf00282	34879209	BRLA_33p000080	BRLA_RS22600		1.131	0.999809
A0A177XIB3	2-hydroxy-acid oxidase	9	2	49.5	5.97	metabolic process		catalytic activity;nucleotide binding	Pf01565, Pf02913		AYJ08_15735			1.131	0.999809
citZ	Citrate synthase	66	15	41.1	6.15									1.13	0.999809
rplM	50S ribosomal protein L13	48	6	16.4	9.88									1.129	0.999809
A0A3M8B888	Uncharacterized protein	8	6	129	5.78									1.129	0.999809
gyrB	DNA gyrase subunit B	18	9	71.8	5.69									1.127	0.999809
A0A0F7C1B8	Riboflavin synthase subunit alpha	11	2	23.9	7.18	metabolic process		catalytic activity	Pf00677					1.126	0.999809
A0A2S5I4L3	Uncharacterized protein	2	1	62.6	6.58									1.125	0.999809
ptsG	PTS system glucose-specific EIICBA component	27	10	72.3	6.18									1.125	0.999809
A0A502HWD8	DUF1385 domain-containing protein	4	1	35.6	8.82									1.124	0.999809
A0A075RA24	Fructose-1,6-bisphosphatase	16	4	34	5.27	metabolic process		catalytic activity;metal ion binding	Pf03320	34877524	BRLA_c044600	BRLA_RS21550	Microbial metabolism in diverse environments; Fructose and mannose metabolism; Carbon metabolism; Biosynthesis of secondary metabolites; Glycolysis / Gluconeogenesis; Metabolic pathways; Methane metabolism; Biosynthesis of antibiotics; Pentose phosphate pathway	1.124	0.999809
guaB	Inosine-5'-monophosphate dehydrogenase	64	23	52	6.95									1.123	0.999809
A0A2S5HDA7	Arylamine N-acetyltransferase	6	1	33.5	6.38									1.123	0.999809
pheA	Prephenate dehydratase	6	1	32.2	5.58									1.123	0.999809
pheA	Prephenate dehydratase	6	1	32.2	5.62									1.123	0.999809
A0A2S5HLB9	Glutathione peroxidase	7	1	20.9	4.98									1.122	0.999809
A0A3M8DJY3	Bacteriocin	9	1	31.4	5.55									1.122	0.999809
A0A3E0RGR3	ABC transporter substrate-binding protein	6	3	60.9	5.64									1.121	0.999809
A0A177XMG3	Alcohol dehydrogenase	20	3	25.2	5.91	metabolic process		catalytic activity	Pf00106, Pf13561		AYJ08_12185			1.12	0.999809
rpsO	30S ribosomal protein S15	18	3	10.5	10.33									1.12	0.999809
A0A2P7V822	Succinyl-CoA--3-ketoacid-CoA transferase	16	2	25.3	6									1.12	0.999809
A0A075R3D6	[Acyl-carrier-protein] S-malonyltransferase	10	10	122.8	6.71	metabolic process		catalytic activity	Pf00698, Pf03060	34874883	BRLA_c020380	BRLA_RS09965		1.119	0.999809
ppsD1	Plipastatin synthase subunit D	14	45	526.1	5.1									1.119	0.999809
rpsC	30S ribosomal protein S3	59	15	24.3	10.13									1.119	0.999809
gid	Methylenetetrahydrofolate--tRNA-(uracil-5-)-methyltransferase TrmFO	7	1	48.6	6.34									1.119	0.999809
A0A4U2Y4D4	SDR family NAD(P)-dependent oxidoreductase	0	1	302.3	5.69									1.119	0.999809
A0A177XLV6	Aspartokinase	2	1	44.5	5.82	metabolic process		catalytic activity	Pf00696, Pf13840		AYJ08_10065			1.119	0.999809
A0A075R311	Fumarate hydratase class I	21	8	55.3	5.54	metabolic process		catalytic activity;metal ion binding	Pf05681, Pf05683	34876796	BRLA_c014880	BRLA_RS07285	Metabolic pathways; Microbial metabolism in diverse environments; Pyruvate metabolism; Carbon metabolism; Biosynthesis of secondary metabolites; Citrate cycle (TCA cycle); Biosynthesis of antibiotics	1.119	0.999809
A0A177XMQ7	Cytokinin riboside 5'-monophosphate phosphoribohydrolase	26	4	20.5	5.76	metabolic process		catalytic activity	Pf02481, Pf03641		AYJ08_09300			1.119	0.999809
A0A2S5HUB7	PTS trehalose transporter subunit IIBC	4	1	51.3	8.88									1.118	0.999809
rplL	50S ribosomal protein L7/L12	93	11	12.4	4.7									1.118	0.999809
mdh	Malate dehydrogenase	65	15	33.5	5.22									1.118	0.999809
A0A177XNK7	Dynamin family protein	3	1	74.5	5.53			catalytic activity;nucleotide binding	Pf00350, Pf01926		AYJ08_06540			1.118	0.999809
ypuI	Uncharacterized protein ypuI	50	8	19.8	4.86									1.118	0.999809
pckA	Phosphoenolpyruvate carboxykinase (ATP)	17	6	57.2	5.35									1.118	0.999809
A0A177XPF2	Inositol-1-monophosphatase	6	1	31.4	5.11	metabolic process		catalytic activity;metal ion binding	Pf00459		AYJ08_06665			1.117	0.999809
A0A075R7C7	ABC-type transport system, ATPase	22	5	29.3	9.44			catalytic activity;nucleotide binding	Pf00005, Pf13304, Pf13555	34876134	BRLA_c042470	BRLA_RS20490		1.116	0.999809
A0A3M8CHP6	Glycine C-acetyltransferase	7	3	43.1	5.92									1.116	0.999809
A0A177XPA4	Uncharacterized protein	5	1	21.9	7.94						AYJ08_10440			1.115	0.999809
asnB	Asparagine synthase	19	10	71.6	6.44									1.115	0.999809
A0A075R133	Aminotransferase	34	10	43.4	6.2	metabolic process		catalytic activity	Pf00155, Pf00266, Pf01041, Pf01053, Pf01212	34878770	BRLA_c019660	BRLA_RS09605	Alanine, aspartate and glutamate metabolism; Novobiocin biosynthesis; Arginine and proline metabolism; Biosynthesis of secondary metabolites; Tyrosine metabolism; Phenylalanine, tyrosine and tryptophan biosynthesis; Cysteine and methionine metabolism; Biosynthesis of amino acids; Biosynthesis of antibiotics; Arginine biosynthesis; Metabolic pathways; 2-Oxocarboxylic acid metabolism; Phenylalanine…	1.115	0.999809
A0A0F7EG78	Chemotaxis protein CheY	19	4	26.5	5.31	metabolic process;regulation of biological process;response to stimulus		DNA binding	Pf00072, Pf00196, Pf08281					1.115	0.999809
A0A3M8AXG6	GGDEF domain-containing protein	1	1	82.8	5.11									1.114	0.999809
gmk	Guanylate kinase	10	2	23.6	5.53									1.113	0.999809
ldh	Leucine dehydrogenase	51	15	39.8	5.64									1.113	0.999809
accB	Biotin carboxyl carrier protein of acetyl-CoA carboxylase	54	5	18.2	4.86									1.113	0.999809
C0ZD10	Biotin carboxylase	3	1	49	5.44			catalytic activity;metal ion binding;nucleotide binding	Pf00289, Pf01071, Pf02222, Pf02785, Pf02786, Pf07478, Pf08442, Pf08443, Pf13535, Pf13549, Pf15632	29259986	BBR47_26920	BBR47_26920; BBR47_RS13680	Biosynthesis of antibiotics; Propanoate metabolism; Biosynthesis of secondary metabolites; Carbon metabolism; Fatty acid metabolism; Microbial metabolism in diverse environments; Metabolic pathways; Pyruvate metabolism; Fatty acid biosynthesis	1.112	0.999809
rpsQ	30S ribosomal protein S17	39	3	10.3	10.21									1.112	0.999809
A0A2S5I0W8	Peptidase	28	27	119.3	5.07									1.112	0.999809
ilvE	Branched-chain-amino-acid aminotransferase	35	9	33.2	5.19									1.112	0.999809
rpsF	30S ribosomal protein S6	41	4	11.3	5.6									1.111	0.999809
A0A3M8CTS4	GNAT family N-acetyltransferase	6	1	16.5	5.29									1.109	0.999809
prfA	Peptide chain release factor 1	7	2	40.3	5.35									1.109	0.999809
A0A075RA14	Aconitate hydratase	58	43	98.5	5.36	metabolic process		catalytic activity;metal ion binding	Pf00330, Pf00694	34874839	BRLA_c039380	BRLA_RS19010	Biosynthesis of secondary metabolites; Carbon metabolism; Biosynthesis of amino acids; Microbial metabolism in diverse environments; Biosynthesis of antibiotics; Metabolic pathways; 2-Oxocarboxylic acid metabolism; Citrate cycle (TCA cycle); Glyoxylate and dicarboxylate metabolism	1.109	0.999809
hisS	Histidine--tRNA ligase	3	1	47.3	5.29									1.109	0.999809
rplX	50S ribosomal protein L24	38	6	11.1	10.23									1.108	0.999809
A0A075R865	Putative phosphoesterase BRLA_c037490	37	5	19.2	5.54			catalytic activity	Pf02834, Pf13563	34878154	BRLA_c037490	BRLA_RS18120		1.108	0.999809
ilvE	Branched-chain-amino-acid aminotransferase	39	10	33.1	5.48									1.108	0.999809
aspS	Aspartate--tRNA ligase	17	9	67.9	5.33									1.107	0.999809
hutU	Urocanate hydratase	19	6	60.5	5.52									1.107	0.999809
pgi	Glucose-6-phosphate isomerase	38	9	49.9	5.64									1.107	0.999809
rpoE	Probable DNA-directed RNA polymerase subunit delta	26	5	22.3	3.8									1.106	0.999809
A0A0F7BZP7	Uncharacterized protein	18	4	25.1	6.35									1.106	0.999809
A0A177XMQ6	RNA helicase	15	6	59.2	7.42		nucleus	catalytic activity;nucleotide binding	Pf00270, Pf00271, Pf03880, Pf06862		AYJ08_11525			1.106	0.999809
gpmI	2,3-bisphosphoglycerate-independent phosphoglycerate mutase	29	8	50.3	5.08									1.105	0.999809
oppF	Oligopeptide/dipeptide ABC transporter, ATP-binding, C-terminal domain protein	33	8	35.6	6.93									1.105	0.999809
era	GTPase Era	7	2	35.1	8.78									1.105	0.999809
A0A2S5I3A8	Aldehyde-alcohol dehydrogenase	29	18	95.5	6.51									1.105	0.999809
A0A075R9P4	Prephenate dehydrogenase	10	4	41.3	5.57	metabolic process;transport		catalytic activity;nucleotide binding	Pf01210, Pf01842, Pf02153, Pf02254, Pf03446, Pf03721, Pf03807, Pf07991	34877961	BRLA_c019290	BRLA_RS09415	Biosynthesis of secondary metabolites; Novobiocin biosynthesis; Metabolic pathways; Phenylalanine, tyrosine and tryptophan biosynthesis; Biosynthesis of amino acids; Biosynthesis of antibiotics	1.105	0.999809
sucD	Succinate--CoA ligase [ADP-forming] subunit alpha	62	13	31.6	6.35									1.104	0.999809
A0A0F7C222	DNA topoisomerase (ATP-hydrolyzing)	5	2	92	6.98	metabolic process	chromosome	catalytic activity;DNA binding;nucleotide binding	Pf00521, Pf03989, Pf04849					1.104	0.999809
namA	NADPH dehydrogenase	27	6	37.6	5.54									1.104	0.999809
rplN	50S ribosomal protein L14	52	9	13	10.07									1.104	0.999809
hutI	Imidazolonepropionase	14	4	45.5	5.77									1.103	0.999809
cccA	Cytochrome b subunit protein B6	69	10	28.2	6.79									1.103	0.999809
rplR	50S ribosomal protein L18	60	6	13.2	10.46									1.103	0.999809
A0A518V1X3	Uncharacterized protein	26	1	9.9	9.7									1.102	0.999809
A0A6M1TZ57	Thiolase family protein	5	1	41.4	6.92									1.102	0.999809
hemL	Glutamate-1-semialdehyde 2,1-aminomutase	24	8	46.2	5.92									1.102	0.999809
accA	Acetyl-coenzyme A carboxylase carboxyl transferase subunit alpha	8	2	35.6	6.9									1.101	0.999809
H0U6Y5	Short chain dehydrogenase family protein	2	3	228.5	5.45	metabolic process		catalytic activity	Pf00106, Pf00108, Pf00109, Pf00550, Pf00668, Pf02801, Pf08659, Pf13745, Pf14765		BLGI_1138			1.101	0.999809
nuoB	NADH-quinone oxidoreductase subunit B	28	3	19.1	8.05									1.1	0.999809
A0A177XM92	Hydroxymethylpyrimidine/phosphomethylpyrimidine kinase	20	4	29.1	5.5	metabolic process		catalytic activity;nucleotide binding	Pf00294, Pf08543		AYJ08_09330			1.099	0.999809
A0A518VAT0	Amino acid adenylation domain-containing protein	6	4	148.7	5.55									1.099	0.999809
A0A3M8DBW5	Uncharacterized protein	13	1	15.2	4.83									1.099	0.999809
rplW	50S ribosomal protein L23	33	4	11	9.6									1.099	0.999809
guaA	GMP synthase [glutamine-hydrolyzing]	37	16	57.2	5.26									1.097	0.999809
J2GEZ7	Uncharacterized protein	2	1	59.8	5.19						PMI05_05640			1.096	0.999809
pheT	Phenylalanine--tRNA ligase beta subunit	18	11	90.2	5.17									1.096	0.999809
A0A6M1UFU3	DUF1573 domain-containing protein	7	1	14.6	6.86									1.096	0.999809
A0A0F7EEB6	ABC transporter substrate-binding protein	16	3	36.7	5.86				Pf01497					1.095	0.999809
gloB	Rhodanese-like domain protein	41	16	52.9	5.48									1.095	0.999809
rplR	50S ribosomal protein L18	14	2	13	10.4									1.094	0.999809
deoC	Deoxyribose-phosphate aldolase	29	5	23.9	5.36									1.094	0.999809
A0A075R069	Malate dehydrogenase (oxaloacetate-decarboxylating)	53	12	43.7	5.06	metabolic process		catalytic activity;metal ion binding;nucleotide binding	Pf00390, Pf03949	34878627	BRLA_c009030	BRLA_RS04435	Two-component system; Carbon metabolism; Pyruvate metabolism	1.093	0.999809
mazG	Nucleoside triphosphate pyrophosphohydrolase/pyrophosphatase MazG	6	3	55.2	4.75									1.093	0.999809
psuG	Pseudouridine-5'-phosphate glycosidase	5	1	33.2	5.3									1.092	0.999809
A0A075R6S2	Putative thiamine biosynthesis protein	37	11	38	5.77	metabolic process			Pf09084, Pf13379	34874731	BRLA_c028370	BRLA_RS13805		1.092	0.999809
A0A075R5B0	PKS domain-containing protein	6	5	144.5	6.16			catalytic activity	Pf00106, Pf00550, Pf00561, Pf08659, Pf12695, Pf12697, Pf14765	34878210	BRLA_c020420	BRLA_RS09985		1.092	0.999809
A0A075RA53	Pyruvate carboxylase	39	33	127.7	5.49	metabolic process		catalytic activity;metal ion binding;nucleotide binding	Pf00289, Pf00364, Pf00682, Pf02222, Pf02436, Pf02655, Pf02785, Pf02786, Pf07478, Pf13533, Pf13535, Pf15632	34878540	BRLA_c038430	BRLA_RS18560	Carbon metabolism; Pyruvate metabolism; Citrate cycle (TCA cycle); Microbial metabolism in diverse environments; Metabolic pathways; Biosynthesis of amino acids	1.091	0.999809
H0UF92	HAMP domain protein	18	9	74.8	5.82	regulation of biological process;response to stimulus	membrane	signal transducer activity	Pf00015, Pf00672		BLGI_4094			1.091	0.999809
rpsM	30S ribosomal protein S13	34	7	14	11.31									1.091	0.999809
A0A075R8B5	Signal peptidase I	5	1	21.6	6.71	metabolic process	membrane	catalytic activity	Pf00717, Pf10502	34876401	BRLA_c033290	BRLA_RS16080	Quorum sensing; Protein export	1.091	0.999809
A0A075R0F1	Glyoxal reductase	58	13	31.4	6.46	metabolic process		catalytic activity	Pf00248	34876351	BRLA_c009840	BRLA_RS04835		1.091	0.999809
A0A177XRI2	Acetoin utilization protein AcuC	2	1	43.3	5.94	metabolic process			Pf00850		AYJ08_06985			1.091	0.999809
A0A075R7I4	Methylmalonyl-CoA carboxyltransferase 12S subunit	24	10	56.3	5.8			catalytic activity	Pf01039, Pf06833	34875801	BRLA_c035070	BRLA_RS16955		1.09	0.999809
A0A075QW11	Arginase	36	9	31.9	5.14	metabolic process		catalytic activity;metal ion binding	Pf00491	34877922	BRLA_c002370	BRLA_RS01195	Biosynthesis of secondary metabolites; Arginine and proline metabolism; Arginine biosynthesis; Metabolic pathways; Biosynthesis of amino acids; Biosynthesis of antibiotics	1.089	0.999809
A0A2S5HZ68	UPF0145 protein C4A76_06500	12	1	11.2	5.16									1.089	0.999809
infB	Translation initiation factor IF-2	30	18	88.7	6.95									1.088	0.999809
A0A075R6L9	NRPS/PKS domain-containing protein	1	4	441.2	5.4	metabolic process		catalytic activity	Pf00106, Pf00501, Pf00550, Pf00668, Pf08659, Pf13193, Pf13745	34876194	BRLA_c024630	BRLA_RS11955	Nonribosomal peptide structures; Quorum sensing	1.087	0.999809
A0A0F7C1F9	Cytochrome C biogenesis protein	9	2	44.4	9.47	cell organization and biogenesis	membrane		Pf01578					1.086	0.999809
A0A502J0J7	Cytochrome C oxidase subunit II	10	1	17.2	7.23									1.086	0.999809
rbfA	Ribosome-binding factor A	7	1	13.7	8.35									1.086	0.999809
A0A0F7EHD2	DNA-binding protein	7	2	33.8	6.71		membrane	DNA binding	Pf01381, Pf12844, Pf13413, Pf13464					1.085	0.999809
rsfS	Ribosomal silencing factor RsfS	18	2	13.5	5.5									1.085	0.999809
folD	Bifunctional protein FolD	9	2	30.8	6.6									1.085	0.999809
A0A075RG57	Transketolase	50	28	72.9	5.72	metabolic process		catalytic activity;metal ion binding	Pf00456, Pf02779, Pf02780, Pf13292	34878645	BRLA_c039570	BRLA_RS19105	Biosynthesis of antibiotics; Biosynthesis of amino acids; Pentose phosphate pathway; Biosynthesis of secondary metabolites; Microbial metabolism in diverse environments; Carbon metabolism; Metabolic pathways	1.085	0.999809
A0A4Y3PHP5	Peptidase M28	4	1	39.7	5.58									1.085	0.999809
rplA	50S ribosomal protein L1	25	5	24.1	9.51									1.085	0.999809
leuB	3-isopropylmalate dehydrogenase	14	3	39.3	5.14									1.084	0.999809
aroA	3-phosphoshikimate 1-carboxyvinyltransferase	33	11	45.4	6.21									1.084	0.999809
A0A0F7EFS5	Chromosome partitioning protein ParB	8	2	33	8.06			DNA binding	Pf02195					1.084	0.999809
A0A0F7EHE5	Master regulator for biofilm formation	41	3	16.7	5.11				Pf06133					1.083	0.999809
H0UFC1	Copper amine oxidase N-terminal domain protein	54	30	75.4	8.88				Pf07833		BLGI_4123			1.083	0.999809
A0A075R503	Glutamate dehydrogenase	40	14	45.5	6.96	metabolic process		catalytic activity	Pf00208, Pf02812	34876871	BRLA_c026000	BRLA_RS12610	Nitrogen metabolism; Metabolic pathways; Taurine and hypotaurine metabolism; Alanine, aspartate and glutamate metabolism; Arginine biosynthesis	1.083	0.999809
glmM	Phosphoglucosamine mutase	41	15	48.4	5.05									1.083	0.999809
H0U988	Uncharacterized protein	37	5	23.3	5.24				Pf01865		BLGI_1956			1.082	0.999809
rnj	Ribonuclease J	9	5	61.5	6.18									1.081	0.999809
mdh	Malate dehydrogenase	20	3	33.2	5.97									1.081	0.999809
A0A075RC42	Putative oxidoreductase	47	8	25.4	5.9	metabolic process		catalytic activity	Pf00106, Pf01073, Pf01488, Pf08659, Pf13561	34879210	BRLA_33p000190	BRLA_RS22645	Fatty acid metabolism; Biosynthesis of unsaturated fatty acids; Metabolic pathways; Biotin metabolism; Fatty acid biosynthesis	1.081	0.999809
A0A075R690	NRPS domain-containing protein	2	4	293.2	5.25	metabolic process		catalytic activity	Pf00501, Pf00550, Pf00668, Pf13193, Pf13745	34877665	BRLA_c026470	BRLA_RS12850		1.081	0.999809
clpY	ATP-dependent protease ATPase subunit HslU	28	12	53	5.58									1.081	0.999809
mscL	Large-conductance mechanosensitive channel	9	1	16.8	8.7									1.081	0.999809
A0A2S5HET0	PTS sugar transporter	24	7	51.5	8.88									1.08	0.999809
yufN	Basic membrane family protein	60	17	36.9	5.53									1.08	0.999809
A0A177XGR0	Coproheme III oxidative decarboxylase	24	5	29.2	5.68				Pf06778		AYJ08_02050			1.08	0.999809
mreB	Cell shape-determining protein MreB	10	3	36.4	6.71									1.08	0.999809
ffh	Signal recognition particle protein	6	2	53.2	9.13									1.08	0.999809
tsf	Elongation factor Ts	64	18	32.1	5.24									1.079	0.999809
A0A177XT44	UDP-N-acetyl glucosamine 2-epimerase	5	2	43.6	6.24			catalytic activity	Pf02350		AYJ08_03400			1.079	0.999809
A0A0F7EG61	Uncharacterized protein	29	7	29.1	4.6									1.079	0.999809
A0A075RA01	Uncharacterized protein	2	1	41.2	5.95			catalytic activity	Pf05913	34875159	BRLA_c037880	BRLA_RS18300		1.079	0.999809
murA	UDP-N-acetylglucosamine 1-carboxyvinyltransferase	5	2	45.6	6.39									1.078	0.999809
A0A0K9Z192	Peroxiredoxin	29	2	16.4	5.21				Pf02566		ADS79_03465			1.078	0.999809
rimO	Ribosomal protein S12 methylthiotransferase RimO	9	3	54.2	4.94									1.078	0.999809
glyQS	Glycine--tRNA ligase	24	9	53.1	5.47									1.078	0.999809
rplK	50S ribosomal protein L11	50	8	14.9	9.61									1.078	0.999809
nfo	Probable endonuclease 4	5	1	29.8	7.47									1.078	0.999809
A0A075R2T0	Fumarate reductase flavoprotein subunit	41	19	65.4	6.18	metabolic process		catalytic activity	Pf00890, Pf02910, Pf03486	34874666	BRLA_c011730	BRLA_RS05755	Biosynthesis of antibiotics; Citrate cycle (TCA cycle); Metabolic pathways; Butanoate metabolism; Carbon metabolism; Biosynthesis of secondary metabolites; Oxidative phosphorylation; Microbial metabolism in diverse environments	1.077	0.999809
gatB	Aspartyl/glutamyl-tRNA(Asn/Gln) amidotransferase subunit B	27	9	53.3	5.29									1.077	0.999809
H0UED5	Uncharacterized protein	46	5	12.7	5.26				Pf08868		BLGI_3779			1.077	0.999809
A0A177XJJ6	Non-ribosomal peptide synthetase	1	2	543.1	5.21	metabolic process		catalytic activity;protein binding	Pf00501, Pf00550, Pf00668, Pf00856, Pf13193, Pf13745		AYJ08_13405			1.077	0.999809
rex	Redox-sensing transcriptional repressor Rex	28	4	23	8.66									1.077	0.999809
thrS	Threonine--tRNA ligase	21	12	73.2	5.81									1.076	0.999809
A0A0F7EIW7	Gramicidin synthetase	5	9	296.3	5.22	metabolic process		catalytic activity	Pf00501, Pf00550, Pf00668, Pf13193, Pf13745					1.075	0.999809
secF	Protein-export membrane protein SecF	12	3	34.8	9.09									1.075	0.999809
gudB	Glutamate dehydrogenase	35	13	46.7	5.55									1.075	0.999809
A0A0F7EGY7	Cysteine synthase	26	4	33.1	5.25	metabolic process		catalytic activity	Pf00291					1.075	0.999809
btG	ABC transporter family protein	50	8	27	5.96									1.075	0.999809
A0A177XQ76	Catabolite control protein A	29	7	37.4	6.39	metabolic process;regulation of biological process		DNA binding	Pf00356, Pf00532, Pf13377, Pf13407, Pf13443		AYJ08_06965			1.075	0.999809
mnmG	tRNA uridine 5-carboxymethylaminomethyl modification enzyme MnmG	11	6	70.8	6.46									1.074	0.999809
nuoA	NADH-quinone oxidoreductase subunit A	14	1	14	5.31									1.074	0.999809
rpsJ	30S ribosomal protein S10	66	9	11.7	9.74									1.074	0.999809
fusA	Elongation factor G	18	12	76.4	5.17									1.073	0.999809
A0A0F7EEL8	Peptide ligase	11	24	289.2	5.1	metabolic process		catalytic activity	Pf00501, Pf00550, Pf00668, Pf13193, Pf13745					1.073	0.999809
A0A502IST7	UVR domain-containing protein	6	1	20	8.6									1.073	0.999809
trpC	Indole-3-glycerol phosphate synthase	38	8	30.1	5.71									1.072	0.999809
A0A1A5X1Q5	Glycolate oxidase subunit GlcD	4	1	50.8	6.39	metabolic process		catalytic activity;nucleotide binding	Pf01565, Pf02913		A6764_17745			1.072	0.999809
A0A0F6XZN9	DD-transpeptidase	3	2	112.7	8.78		membrane	catalytic activity;protein binding	Pf00041, Pf00905, Pf00912					1.072	0.999809
gyrA	DNA gyrase subunit A	16	11	96.3	5.43									1.072	0.999809
A0A3M8CI05	Uncharacterized protein	4	1	54.5	7.65									1.071	0.999809
H0UDG2	Bacterial regulatory s, tetR family protein	7	1	21.9	5.25	metabolic process;regulation of biological process		DNA binding	Pf00440		BLGI_3456			1.071	0.999809
A0A553KKL1	MbtH family protein	17	1	8.5	4.59									1.071	0.999809
H0UE57	Acetyltransferase family protein	7	1	15.6	5.57			catalytic activity	Pf00583, Pf13508, Pf13523, Pf13673		BLGI_3701			1.07	0.999809
J2ZYP8	Putative homoserine kinase type II (Protein kinase fold)	2	1	38.6	10.48	metabolic process		catalytic activity	Pf01633, Pf01636, Pf07914		PMI05_04437			1.07	0.999809
A0A0F7BZK0	NADH:ubiquinone oxidoreductase subunit M	4	2	56.5	7.08	metabolic process	membrane	catalytic activity	Pf00361					1.07	0.999809
glyA	Serine hydroxymethyltransferase	41	13	45.6	6.24									1.07	0.999809
fusA	Elongation factor G	45	25	76.2	5.14									1.07	0.999809
A0A0F7EF53	PTS fructose transporter subunit IIA	6	2	65.5	5.64	transport	membrane	catalytic activity;transporter activity	Pf00359, Pf02302, Pf02378, Pf07565, Pf10011					1.07	0.999809
A0A075R5T5	Flagellin	63	27	41.3	7.08	cellular component movement	extracellular	structural molecule activity	Pf00669, Pf00700	34878142	BRLA_c028700	BRLA_RS13970	Two-component system; Flagellar assembly	1.069	0.999809
A0A075R8N4	Putative ABC transporter ATP-binding protein YjjK	2	1	77.3	5.26	regulation of biological process;response to stimulus		catalytic activity;DNA binding;nucleotide binding	Pf00005, Pf00006, Pf00350, Pf01926, Pf08477, Pf12848, Pf13207, Pf13304		BRLA_c033210			1.069	0.999809
A0A075R377	Citrate/succinate antiporter	10	4	52.2	9.35	transport	membrane	transporter activity	Pf00939	34874781	BRLA_c026680	BRLA_RS12955		1.069	0.999809
A0A177XGT7	Fumarylacetoacetate hydrolase	22	4	22.8	5.25	metabolic process		catalytic activity	Pf01557		AYJ08_18175			1.069	0.999809
A0A075R139	ABC-type enterochelin transport system, periplasmic binding protein	54	16	35.5	6.6	transport			Pf01497		BRLA_c019710		ABC transporters	1.069	0.999809
clpX	ATP-dependent Clp protease ATP-binding subunit ClpX	41	13	46.4	5.06									1.069	0.999809
azoR2	FMN dependent NADH:quinone oxidoreductase	54	8	26.1	5.49									1.068	0.999809
A0A075R9N9	NRPS domain-containing protein	12	10	124.9	5.44	metabolic process		catalytic activity	Pf00501, Pf00550, Pf00975, Pf12697, Pf13193	34875247	BRLA_c036810	BRLA_RS17785		1.068	0.999809
A0A075R6I4	Isochorismatase family protein YecD	12	2	20.5	5.36	metabolic process		catalytic activity	Pf00857	34875742	BRLA_c027470	BRLA_RS13365		1.068	0.999809
aroC	Chorismate synthase	6	2	42.8	6.27									1.067	0.999809
A0A0F7BZE9	Aminopeptidase	32	9	41.7	5.34	metabolic process		catalytic activity	Pf02073					1.067	0.999809
A0A502INQ1	Peroxiredoxin	60	8	19.8	4.97									1.067	0.999809
H0UHF7	YbbR-like family protein	5	1	45	5.25		membrane		Pf07949		BLGI_4870			1.067	0.999809
A0A177XNN6	Class V aminotransferase	4	1	42.3	6.54			catalytic activity	Pf00266, Pf01053		AYJ08_05520			1.066	0.999809
ychF	Ribosome-binding ATPase YchF	12	2	40.1	4.93									1.066	0.999809
sigB	RNA polymerase sigma factor SigB	3	1	30.3	7.59									1.066	0.999809
A0A075QZY6	Putative permease	11	3	38.6	9.32	transport	membrane		Pf03547	34878976	BRLA_c008380	BRLA_RS04125		1.066	0.999809
A0A2S5HYQ7	FAD-dependent oxidoreductase	30	8	43.6	6.71									1.066	0.999809
yloU	Uncharacterized protein yloU	48	5	13.1	5.54									1.065	0.999809
argD	Acetylornithine aminotransferase	29	9	42.7	6.14									1.065	0.999809
A0A177XR56	Uncharacterized protein	10	1	15.8	4.96						AYJ08_07485			1.065	0.999809
A0A0F7BYU8	DNA-binding response regulator	6	1	23	5.33	metabolic process;regulation of biological process;response to stimulus		DNA binding	Pf00072, Pf00196, Pf04545, Pf08281					1.064	0.999809
A0A385T8H1	DNA-binding response regulator	9	2	27.3	5.35									1.064	0.999809
dnaK	Chaperone protein DnaK	54	35	65.9	4.84									1.064	0.999809
glmU	Bifunctional protein GlmU	8	3	49.8	5.53									1.063	0.999809
A0A075R7A2	Gamma-D-glutamyl-L-lysine endopeptidase	5	1	37.1	5.53			catalytic activity	Pf00877	34878294	BRLA_c027590	BRLA_RS13425		1.063	0.999809
secG	Protein-export membrane protein SecG	23	1	8.2	10.3									1.063	0.999809
A0A177XRI1	Zinc metalloprotease	17	4	46.2	7.02	metabolic process	membrane	catalytic activity;metal ion binding;protein binding	Pf00595, Pf02163, Pf13180		AYJ08_04415			1.063	0.999809
A0A177XM97	Polysaccharide deacetylase	2	1	77.6	9.04	metabolic process		catalytic activity	Pf01522, Pf07075		AYJ08_09275			1.062	0.999809
A0A553KRF5	PRD domain-containing protein	1	1	75.1	7.11									1.062	0.999809
udk	Uridine kinase	6	1	24.8	6.16									1.061	0.999809
H0UEX1	Uncharacterized protein	25	7	35.3	5.39						BLGI_3973			1.061	0.999809
folE	GTP cyclohydrolase 1	14	3	21	6.89									1.061	0.999809
fabI	Enoyl-[acyl-carrier-protein] reductase [NADH]	41	11	27.6	6.3									1.06	0.999809
glpX	Fructose-1,6-bisphosphatase	10	2	35	5.02									1.06	0.999809
H0U5B2	Amino acid adenylation domain protein	8	8	149.1	5.71	metabolic process		catalytic activity	Pf00501, Pf00550, Pf00668, Pf00975, Pf13193, Pf13745		BLGI_542			1.06	0.999809
A0A3M8B760	Flagellin	7	2	58.8	5.05									1.059	0.999809
lysS	Lysine--tRNA ligase	14	6	58.5	5.78									1.059	0.999809
A0A1A5XJH0	Flagellin	10	1	29.7	5.72	cellular component movement	extracellular	structural molecule activity	Pf00669, Pf00700		A6764_11620			1.059	0.999809
argR	Arginine repressor	14	2	17.1	6.77									1.058	0.999809
rpsS	30S ribosomal protein S19	69	10	10.8	9.99									1.058	0.999809
A0A0F7BY45	TetR family transcriptional regulator	6	1	22	7.42	metabolic process;regulation of biological process		DNA binding	Pf00440, Pf08359					1.058	0.999809
pdxS	Pyridoxal 5'-phosphate synthase subunit PdxS	60	14	31.7	5.74									1.057	0.999809
A0A0F7C000	Uncharacterized N-acetyltransferase EX87_12535	26	5	18.7	5.95			catalytic activity	Pf00583, Pf13508					1.057	0.999809
A0A075R881	Putative multidrug resistance ABC transporter ATP-binding/permease protein YheH	2	1	76.9	6.77	transport	membrane	catalytic activity;nucleotide binding;transporter activity	Pf00005, Pf00664, Pf13558	34877709	BRLA_c045080	BRLA_RS21790	ABC transporters	1.057	0.999809
grpE	Protein GrpE	35	5	21.6	4.59									1.056	0.999809
H0UC03	Methyl-accepting chemotaxis (MCP) signaling domain protein	12	4	55.5	5	regulation of biological process;response to stimulus	membrane	signal transducer activity	Pf00015, Pf12128		BLGI_2926			1.055	0.999809
A0A0F7C173	Chemotaxis protein	3	2	65	5.01	regulation of biological process;response to stimulus	membrane	signal transducer activity	Pf00015, Pf00672					1.055	0.999809
argB	Acetylglutamate kinase	35	5	29.2	4.84									1.054	0.999809
A0A0F7EIJ3	Thiol-disulfide oxidoreductase	7	1	19.9	8.38	cellular homeostasis;metabolic process;regulation of biological process		antioxidant activity;catalytic activity	Pf00085, Pf00578, Pf08534, Pf13098, Pf13905					1.054	0.999809
A0A517I2R7	M42 family metallopeptidase	4	1	39.6	5.29									1.053	0.999809
A0A0F7BYP3	General stress protein	49	12	38.1	5.36	metabolic process		catalytic activity	Pf00248					1.052	0.999809
rplA	50S ribosomal protein L1	56	15	24.3	9.47									1.052	0.999809
A0A177XN76	Multidrug ABC transporter	35	30	112.9	6.32	transport	membrane	transporter activity	Pf00873, Pf03176		AYJ08_06870			1.052	0.999809
rihC	Non-specific ribonucleoside hydrolase RihC	7	2	33.9	5.59									1.051	0.999809
A0A075R798	2-dehydropantoate 2-reductase	3	1	34.5	5.41	metabolic process;transport	cytoplasm	catalytic activity;nucleotide binding;transporter activity	Pf02302, Pf02558, Pf03807, Pf08546	34878286	BRLA_c042170	BRLA_RS20345	Biosynthesis of secondary metabolites; Metabolic pathways; Pantothenate and CoA biosynthesis	1.051	0.999809
proC	Pyrroline-5-carboxylate reductase	3	1	30.3	6.21									1.05	0.999809
A0A502H8X4	Zinc metallopeptidase	7	1	25	7.66									1.05	0.999809
ftsZ	Cell division protein FtsZ	47	15	40.3	5.17									1.05	0.999809
tpiA	Triosephosphate isomerase	44	10	27	5									1.049	0.999809
A0A177XLH6	Bacillithiol biosynthesis deacetylase BshB1	3	1	26.2	6.07	metabolic process		catalytic activity	Pf02585		AYJ08_13640			1.049	0.999809
A0A075QXA8	Bacterial Ig-like domain-containing protein	38	10	30.9	9.98					34876258	BRLA_c006690	BRLA_RS03315		1.048	0.999809
clpP	ATP-dependent Clp protease proteolytic subunit	46	9	21.2	6.04									1.047	0.999809
A0A0F6Y0D7	Methylmalonyl-CoA carboxyltransferase	2	1	56.8	6.43	metabolic process		catalytic activity	Pf01039, Pf06833					1.047	0.999809
A0A0F7C0X8	ABC transporter substrate-binding protein	10	3	60.8	6.96	transport			Pf00496					1.047	0.999809
A0A177XT46	Uncharacterized protein	3	2	97.7	8.57	cellular component movement			Pf00395, Pf04620, Pf09992		AYJ08_03395			1.046	0.999809
J2H7F2	Methyl-accepting chemotaxis protein	7	1	38.2	4.93	regulation of biological process;response to stimulus	membrane	signal transducer activity	Pf00015		PMI05_00735			1.046	0.999809
hup	DNA-binding protein HU	83	12	9.7	9									1.046	0.999809
A0A075QZ37	NADH-dependent butanol dehydrogenase A	11	4	43.2	5.54	metabolic process		catalytic activity;metal ion binding	Pf00465, Pf01948, Pf13685	34877480	BRLA_c004810	BRLA_RS02380	Butanoate metabolism	1.045	0.999809
A0A177XIH7	Flagellin	82	35	40.1	7.08	cellular component movement	extracellular	structural molecule activity	Pf00669, Pf00700		AYJ08_18330			1.045	0.999809
A0A075R9I4	Putative siderophore-binding lipoprotein YfiY	5	1	34.1	8.69				Pf01497	34875800	BRLA_c042740	BRLA_RS20620	ABC transporters	1.045	0.999809
rpsD	30S ribosomal protein S4	59	16	22.8	10.29									1.045	0.999809
A0A0F7EJP9	Flagellin	70	32	40.1	6.73	cellular component movement	extracellular	structural molecule activity	Pf00669, Pf00700					1.044	0.999809
A0A177XIJ6	Probable transcriptional regulatory protein AYJ08_18435	19	4	27.8	4.82	metabolic process;regulation of biological process	cytoplasm	DNA binding	Pf01709		AYJ08_18435			1.044	0.999809
A0A177XNC7	Uncharacterized protein	7	1	19.4	5.82						AYJ08_10895			1.043	0.999809
A0A502HTC6	FMN-binding protein	20	5	31.3	5.4									1.043	0.999809
alaS	Alanine--tRNA ligase	12	3	46.7	5.85									1.043	0.999809
A0A177XS00	DEAD/DEAH box helicase	3	1	46	9.74			catalytic activity;DNA binding;nucleotide binding	Pf00270, Pf00271, Pf04851		AYJ08_20260			1.043	0.999809
A0A0F7EI75	Biotin carboxylase	24	8	49.4	5.31			catalytic activity;metal ion binding;nucleotide binding	Pf00289, Pf01071, Pf02222, Pf02785, Pf02786, Pf07478, Pf13535, Pf13549, Pf15632					1.042	0.999809
A0A3M8AU61	Uncharacterized protein	8	1	10.5	6.55									1.042	0.999809
nusA	Transcription termination/antitermination protein NusA	47	12	40.8	5.14									1.042	0.999809
A0A1Y4X6F1	NADH-quinone oxidoreductase subunit I	23	3	15.8	5.9	metabolic process	membrane	catalytic activity	Pf00037, Pf12838, Pf13183, Pf13187, Pf13237, Pf13484, Pf13534, Pf14697					1.042	0.999809
A0A177XR45	Acetoin utilization protein AcuB	26	3	24.2	5.5	metabolic process		catalytic activity	Pf00478, Pf00571, Pf01842, Pf13291		AYJ08_06990			1.042	0.999809
mnmG	tRNA uridine 5-carboxymethylaminomethyl modification enzyme MnmG	6	3	70.9	6.32									1.042	0.999809
A0A385TBQ3	Cysteine desulfurase	9	3	45	5.9									1.042	0.999809
A0A656ZV89	General stress protein	11	1	12.3	6.52									1.041	0.999809
speE	Polyamine aminopropyltransferase	60	15	31.4	5.52									1.041	0.999809
A0A177XL29	Arginase	23	6	31.9	5.21	metabolic process		catalytic activity;metal ion binding	Pf00491		AYJ08_15840			1.039	0.999809
kamA	L-lysine 2,3-aminomutase	33	10	51.4	6									1.039	0.999809
fba	Fructose-1,6-bisphosphate aldolase, class II	63	17	30.7	5.52									1.038	0.999809
A0A502IM39	2-oxoacid:acceptor oxidoreductase subunit alpha	24	11	64.2	5.4									1.038	0.999809
pepT	Peptidase T	39	10	39.8	5.11									1.038	0.999809
rpmC	50S ribosomal protein L29	65	4	7.5	9.38									1.038	0.999809
asd	Aspartate-semialdehyde dehydrogenase	38	7	37.7	5.99									1.037	0.999809
btC	Nonribosomal peptide synthetase C	14	45	526.2	5.12									1.036	0.999809
A0A075R0A9	Dihydrolipoyl dehydrogenase	19	7	51	5.9	cellular homeostasis;metabolic process;regulation of biological process		catalytic activity;nucleotide binding	Pf00070, Pf02852, Pf07992	34875142	BRLA_c017230	BRLA_RS08425	Biosynthesis of antibiotics; Biosynthesis of secondary metabolites; Glycine, serine and threonine metabolism; Glycolysis / Gluconeogenesis; Citrate cycle (TCA cycle); Metabolic pathways; Valine, leucine and isoleucine degradation; Pyruvate metabolism; Glyoxylate and dicarboxylate metabolism; Carbon metabolism; Propanoate metabolism; Microbial metabolism in diverse environments	1.036	0.999809
A0A075QZK0	Macrolide export protein MacA	8	2	44.6	5.99	transport	membrane	transporter activity	Pf00529, Pf12700, Pf13437, Pf13533	34878454	BRLA_c006610	BRLA_RS03275		1.036	0.999809
clpC	Negative regulator of genetic competence ClpC/MecB	29	22	91.7	6.24									1.036	0.999809
rho	Transcription termination factor Rho	10	4	48.5	6.7									1.036	0.999809
A0A0F6XYS2	2-amino-3-ketobutyrate CoA ligase	37	11	43.1	6.21	metabolic process		catalytic activity	Pf00155, Pf01276					1.035	0.999809
trpS	Tryptophan--tRNA ligase	31	8	37.1	5.39									1.035	0.999809
rbsK	Ribokinase	3	1	32.4	6.16									1.035	0.999809
rplS	50S ribosomal protein L19	39	7	13.6	11.06									1.034	0.999809
H0UB68	Putative lipoprotein	62	22	41.3	5.59						BLGI_2641			1.034	0.999809
A0A0F6XYR6	GNAT family acetyltransferase	5	1	21.4	6.7			catalytic activity	Pf00583, Pf13302, Pf13420					1.034	0.999809
dapB	4-hydroxy-tetrahydrodipicolinate reductase	18	4	28.9	5.77									1.034	0.999809
rpsG	30S ribosomal protein S7	62	15	17.9	10.26									1.033	0.999809
rpsB	30S ribosomal protein S2	67	19	26.5	7.49									1.033	0.999809
A0A075R1N3	GTP pyrophosphokinase YjbM	13	3	32.5	5.77	metabolic process		catalytic activity	Pf04607	34877024	BRLA_c021810	BRLA_RS10630	Purine metabolism	1.033	0.999809
A0A075R2U8	Cobalt-precorrin-3B C(17)-methyltransferase	8	4	66.2	5.48	metabolic process		catalytic activity	Pf00590, Pf01077	34877141	BRLA_c011880	BRLA_RS05830	Metabolic pathways; Porphyrin and chlorophyll metabolism	1.032	0.999809
secD	Protein translocase subunit SecD	35	11	44.7	8.79									1.032	0.999809
sucD	Succinate--CoA ligase [ADP-forming] subunit alpha	47	10	31.1	5.53									1.032	0.999809
gltX	Glutamate--tRNA ligase	26	12	56	5.53									1.031	0.999809
H0UFN2	Condensation domain protein	27	11	53.9	5.85				Pf00668, Pf13745		BLGI_4244			1.031	0.999809
tdk	Thymidine kinase	6	1	23.5	6.39									1.031	0.999809
rplT	50S ribosomal protein L20	45	8	13.7	11.53									1.031	0.999809
rplJ	50S ribosomal protein L10	58	9	18.5	6.86									1.03	0.999809
A0A075QZI0	Iron-sulfur cluster carrier protein	12	3	41.8	6.27			catalytic activity;metal ion binding;nucleotide binding	Pf01883, Pf10609		BRLA_c002160			1.03	0.999809
uvrB	UvrABC system protein B	2	1	75.2	5.64									1.029	0.999809
rnj	Ribonuclease J	7	3	60.7	6.14									1.029	0.999809
pgi	Glucose-6-phosphate isomerase	40	10	49.8	5.74									1.029	0.999809
topA	DNA topoisomerase 1	2	1	78.7	6.98									1.029	0.999809
rpsI	30S ribosomal protein S9	55	5	14.5	11									1.028	0.999809
A0A075R709	Esterase family protein	10	2	28.2	5.36	metabolic process		catalytic activity	Pf00135, Pf00561, Pf00756, Pf02230	34877100	BRLA_c029070	BRLA_RS14125		1.028	0.999809
A0A177XPD4	Isocitrate dehydrogenase [NADP]	60	26	46.9	5.2	metabolic process		catalytic activity;metal ion binding;nucleotide binding	Pf00180		AYJ08_09140			1.028	0.999809
A0A0K9YS51	Cu_amine_oxidN1 domain-containing protein	4	1	22	6.05				Pf07833		ADS79_22045			1.027	0.999809
H0U5E1	SA1989 protein	30	5	36.5	5.08	metabolic process		catalytic activity	Pf00107		BLGI_571			1.027	0.999809
prkC	Non-specific serine/threonine protein kinase	6	3	74.6	5.39									1.027	0.999809
A0A177XGG8	Bmp domain-containing protein	19	3	35.9	7.31		membrane		Pf02608, Pf13407		AYJ08_01725			1.026	0.999809
A0A075R3G4	Flagellin	67	30	40.7	6.21	cellular component movement	extracellular	structural molecule activity	Pf00669, Pf00700	34878281	BRLA_c020680	BRLA_RS10110	Flagellar assembly; Two-component system	1.026	0.999809
atpC	ATP synthase epsilon chain	37	4	14.8	6.34									1.026	0.999809
tcyC	L-cystine import ATP-binding protein TcyC	11	1	27.6	7.05									1.025	0.999809
acnA	Aconitate hydratase	42	33	98.6	5.4									1.025	0.999809
A0A502HFQ9	Protein-glutamate O-methyltransferase	3	1	30.7	8.78									1.025	0.999809
pgk	Phosphoglycerate kinase	26	7	41.8	5.34									1.025	0.999809
A0A0F7EJM0	ABC transporter ATP-binding protein	16	8	61.2	5.16			catalytic activity;nucleotide binding	Pf00005, Pf12848, Pf13304					1.024	0.999809
A0A0Q3WIZ2	Nitrite reductase	3	1	23.1	5.57	metabolic process		catalytic activity	Pf01077		AN963_08940			1.024	0.999809
pxpA	5-oxoprolinase subunit A	15	3	27.6	6.39									1.024	0.999809
V6MBW6	Acetylornithine aminotransferase	4	1	44	5.57	metabolic process	cytoplasm	catalytic activity	Pf00202		T458_18170			1.024	0.999809
A0A075R349	NRPS domain-containing protein	3	4	217.6	5.72	metabolic process		catalytic activity	Pf00296, Pf00501, Pf00550, Pf00668, Pf13193	34875282	BRLA_c026430	BRLA_RS12830		1.024	0.999809
rpe	Ribulose-phosphate 3-epimerase	11	2	23.5	6.11									1.023	0.999809
mtaD2	5-methylthioadenosine/S-adenosylhomocysteine deaminase	24	10	47.8	5.33									1.023	0.999809
A0A075R1L0	Phosphoglycolate phosphatase	5	1	28.2	4.91	metabolic process		catalytic activity	Pf00702, Pf13242, Pf13419	34878899	BRLA_c007800	BRLA_RS03840		1.023	0.999809
dacA	Serine-type D-Ala-D-Ala carboxypeptidase	31	11	46.6	8.5									1.023	0.999809
leuS	Leucine--tRNA ligase	16	12	93.3	5.45									1.022	0.999809
A0A177XT64	Acetyl-CoA acetyltransferase	41	10	41.5	5.97	metabolic process		catalytic activity	Pf00108, Pf02803		AYJ08_03550			1.021	0.999809
H0UB86	Helix-turn-helix family protein	36	5	20.6	6.29			DNA binding	Pf01381, Pf07883, Pf12844, Pf13560		BLGI_2659			1.021	0.999809
atpD	ATP synthase subunit beta	78	23	51	5.05									1.021	0.999809
A0A075R790	Membrane protein	4	2	62.5	7.2		membrane			34877118	BRLA_c011200	BRLA_RS05490		1.02	0.999809
aroA	3-phosphoshikimate 1-carboxyvinyltransferase	57	18	45.4	6.32									1.02	0.999809
A0A177XPX5	Purine nucleoside phosphorylase	22	6	29.2	5.64	metabolic process		catalytic activity	Pf01048		AYJ08_07625			1.02	0.999809
rnc	Ribonuclease 3	5	1	27	5.41									1.02	0.999809
A0A0F7BZI5	Peptide transporter	4	2	66.4	8.62	transport	membrane		Pf03169					1.019	0.999809
coaX	Type III pantothenate kinase	5	1	27.7	7.78									1.019	0.999809
A0A075QZ09	30S ribosomal protein S1	6	4	80.7	5.66	metabolic process;response to stimulus	ribosome	catalytic activity	Pf00575, Pf02075, Pf09371, Pf12836, Pf14635, Pf14639	34878369	BRLA_c004280	BRLA_RS02120		1.019	0.999809
ravA	Regulatory ATPase RavA	3	1	35.8	6.9									1.018	0.999809
rpsH	30S ribosomal protein S8	61	10	14.8	9.79									1.017	0.999809
ruvA	Holliday junction ATP-dependent DNA helicase RuvA	5	1	22.7	6.93									1.017	0.999809
A0A2P7VH72	DUF58 domain-containing protein	9	1	32.4	6.74									1.017	0.999809
A0A075R4B6	Oligoendopeptidase F, plasmid	23	12	69.5	5.14	metabolic process		catalytic activity;metal ion binding	Pf01432, Pf08439	34877221	BRLA_c019800	BRLA_RS09675		1.016	0.999809
serS	Serine--tRNA ligase	23	6	48.7	5.68									1.016	0.999809
secY	Protein translocase subunit SecY	23	7	47.5	10.1									1.015	0.999809
A0A385TDV6	S-layer homology domain-containing protein	41	58	121.2	5.25									1.015	0.999809
A0A075R9N8	UvrABC system protein A	10	6	106.8	6.35	cell communication;metabolic process;response to stimulus	cytoplasm	catalytic activity;DNA binding;metal ion binding;nucleotide binding	Pf00005, Pf13207, Pf13304	34878352	BRLA_c043380	BRLA_RS20940	Nucleotide excision repair	1.014	0.999809
purA	Adenylosuccinate synthetase	9	3	47	6.7									1.014	0.999809
A0A177XIL4	Polyketide synthase	12	31	386.1	6.32	metabolic process		catalytic activity	Pf00106, Pf00108, Pf00109, Pf00550, Pf02801, Pf08241, Pf08242, Pf08659, Pf12847, Pf13489, Pf13561, Pf13649, Pf13847		AYJ08_18260			1.013	0.999809
A0A177XQ08	Cytoplasmic protein	17	3	25.4	6.79			catalytic activity;metal ion binding	Pf03473, Pf03475		AYJ08_04125			1.013	0.999809
H0UB29	Phosphoglycerate mutase family protein	4	1	22.8	6.8	metabolic process		catalytic activity	Pf00300		BLGI_2602			1.013	0.999809
murD	UDP-N-acetylmuramoylalanine--D-glutamate ligase	3	1	49.8	5.62									1.012	0.999809
mcsB	Protein-arginine kinase	11	3	40.2	6.2									1.011	0.999809
A0A177XKF2	Quinol oxidase subunit 2	9	2	36	6.47	metabolic process;transport	membrane	catalytic activity;metal ion binding;transporter activity			AYJ08_12855			1.011	0.999809
A0A502IZU5	Uncharacterized protein	8	1	14.2	8.4									1.01	0.999809
ftsH	ATP-dependent zinc metalloprotease FtsH	32	17	73.5	5.64									1.01	0.999809
mtrB	Transcription attenuation protein MtrB	14	1	8.9	7.69									1.008	0.999809
icmF	Fused isobutyryl-CoA mutase	20	20	121.5	5.53									1.008	0.999809
A0A0F7EIC8	DUF4097 domain-containing protein	5	1	32.8	5.14		membrane		Pf13345, Pf13349, Pf13844					1.008	0.999809
rex	Redox-sensing transcriptional repressor Rex	27	4	23.4	8.22									1.007	0.999809
mdh	Malate dehydrogenase	28	6	33.3	5.2									1.007	0.999809
A0A075R101	Heme-based aerotactic transducer HemAT	18	4	49	5.8	regulation of biological process;response to stimulus	membrane	signal transducer activity	Pf00015, Pf11563	34876130	BRLA_c004900	BRLA_RS02425		1.007	0.999809
A0A075R7Q3	2',3'-cyclic-nucleotide 2'-phosphodiesterase/3'-nucleotidase	50	34	91.6	5.49	metabolic process		catalytic activity;metal ion binding;nucleotide binding	Pf00149, Pf02872, Pf07833	34875688	BRLA_c012700	BRLA_RS06240	Pyrimidine metabolism; Purine metabolism	1.007	0.999809
A0A0F7EIP3	Manganese ABC transporter permease	4	2	48.9	9.36	transport	membrane	catalytic activity;transporter activity	Pf00950					1.006	0.999809
dapA	4-hydroxy-tetrahydrodipicolinate synthase	10	2	31.2	5.1									1.006	0.999809
pspA	PspA/IM30 family protein	70	23	25.3	6.18									1.005	0.999809
rdgB	dITP/XTP pyrophosphatase	7	1	21.9	5.11									1.005	0.999809
A0A2S5HRN2	Flagellin	56	24	41.8	6.37									1.005	0.999809
hslO	33 kDa chaperonin	12	3	31.7	4.96									1.005	0.999809
A0A0F6Y0W3	Regulatory protein	3	1	25.4	7.53	metabolic process		catalytic activity	Pf00218, Pf02581					1.004	0.999809
ypfD	30S ribosomal protein S1 homolog	66	31	43.5	5.19									1.004	0.999809
A0A291BQF8	Uncharacterized protein	1	1	107.7	8.69									1.003	0.999809
rpoD	RNA polymerase sigma factor SigA	18	3	43.3	4.82									1.002	0.999809
H0U4L2	O-methyltransferase family protein	66	20	39.1	5.3	metabolic process		catalytic activity	Pf00891, Pf12847		BLGI_278			1.002	0.999809
pah	Biopterin-dependent aromatic amino acid hydroxylase family protein	15	8	66	4.91									1.001	0.999809
sufB	FeS assembly protein SufB	16	6	52.4	5.16									1.001	0.999809
infC	Translation initiation factor IF-3	53	7	19.3	9.36									1.001	0.999809
A0A075QXS6	Trifunctional nucleotide phosphoesterase protein YfkN	33	20	67.5	7.27	metabolic process		catalytic activity;nucleotide binding	Pf00149, Pf02872, Pf09587	34878752	BRLA_c008210	BRLA_RS04040	Biosynthesis of secondary metabolites; Nicotinate and nicotinamide metabolism; Pyrimidine metabolism; Purine metabolism; Metabolic pathways	1.001	0.999809
A0A2S5HJN7	N-acetyltransferase	18	3	22.1	7.59									1	0.999809
hup	DNA-binding protein HU	81	9	9.8	8.97									0.999	0.999809
trpD	Anthranilate phosphoribosyltransferase	13	4	36.5	6.89									0.999	0.999809
ribH	6,7-dimethyl-8-ribityllumazine synthase	68	8	16.6	6.54									0.999	0.999809
A0A0F7EEZ0	Cell division inhibitor MinD	11	2	28.7	5.77	cell division		catalytic activity;nucleotide binding	Pf01656, Pf10609, Pf13614					0.998	0.999809
A0A2S5I1J1	Insulinase family protein	9	3	46.8	5.49									0.998	0.999809
A0A177XPU0	Serine protease	4	1	45.2	6.2	metabolic process	membrane	catalytic activity;protein binding	Pf00089, Pf13180, Pf13365		AYJ08_08075			0.998	0.999809
proS	Proline--tRNA ligase	24	11	63.7	5.29									0.998	0.999809
M8DEB1	ATP-dependent DNA helicase	2	1	86.9	6.46	metabolic process	cytoplasm	catalytic activity;DNA binding;nucleotide binding	Pf00580, Pf01443, Pf13086, Pf13245, Pf13361, Pf13538, Pf13604		I532_15786			0.998	0.999809
A0A177XKF4	DNA-binding protein	6	2	49.9	5.78			DNA binding;protein binding	Pf01381, Pf12844, Pf13560		AYJ08_12675			0.997	0.999809
A0A075R4J0	Uncharacterized protein	21	5	38.4	6.57					34876641	BRLA_c020750	BRLA_RS10140		0.997	0.999809
argC	N-acetyl-gamma-glutamyl-phosphate reductase	28	5	38.6	6.86									0.997	0.999809
acdA	Acyl-CoA dehydrogenase, N-terminal domain protein	52	16	42	5.29									0.996	0.999809
V6MDQ2	NADH dehydrogenase	2	1	43.2	5.97	metabolic process		catalytic activity	Pf00070, Pf07992, Pf13738		T458_22250			0.996	0.999809
A0A502INN9	Acyl-CoA dehydrogenase	21	6	41.3	6.14									0.996	0.999809
pepT	Peptidase T	30	8	45.6	5.15									0.996	0.999809
H0U4B6	Radical SAM superfamily protein	10	3	44.4	7.05			catalytic activity	Pf04055, Pf13353, Pf13394		BLGI_181			0.996	0.999809
argB	Acetylglutamate kinase	38	6	27.8	4.7									0.994	0.999809
rpsT	30S ribosomal protein S20	30	3	10.1	11.19									0.993	0.999809
A0A553KL64	Uncharacterized protein	4	1	28.3	9.25									0.993	0.999809
A0A075R428	D-alanine aminotransferase	3	1	32.4	6.65	metabolic process		catalytic activity	Pf01063	34877128	BRLA_c016040	BRLA_RS07845	Arginine and proline metabolism; Metabolic pathways; D-Arginine and D-ornithine metabolism; D-Alanine metabolism; Lysine degradation; Phenylalanine metabolism	0.993	0.999809
H0U5W4	Methyl-accepting chemotaxis (MCP) signaling domain protein	14	3	50.9	6.65	regulation of biological process;response to stimulus	membrane	signal transducer activity	Pf00015, Pf11563		BLGI_745			0.992	0.999809
A0A075R147	N-acetylglucosamine-6-phosphate deacetylase	25	7	42.3	5.3	metabolic process		catalytic activity	Pf01979, Pf07969, Pf13147, Pf13594	34876697	BRLA_c019810	BRLA_RS09680	Biosynthesis of antibiotics; Amino sugar and nucleotide sugar metabolism	0.992	0.999809
disA	Diadenylate cyclase	4	1	30.5	9.41									0.991	0.999809
A0A075R8Z8	Translocation protein TolB	18	14	73.3	5.03					34878662	BRLA_c035490	BRLA_RS17165		0.991	0.999809
A0A075QY67	Thioesterase domain-containing protein	17	3	26.7	6.21	metabolic process		catalytic activity	Pf00975, Pf12695, Pf12697	34878581	BRLA_c009560	BRLA_RS04700		0.991	0.999809
A0A0F7EFY9	Tyrocidine synthase 3	12	10	124.8	5.5	metabolic process		catalytic activity	Pf00501, Pf00550, Pf00975, Pf12697, Pf13193					0.989	0.996535
coaBC	Coenzyme A biosynthesis bifunctional protein CoaBC	3	1	45.4	6.38									0.989	0.999809
A0A177XMS6	Kinase inhibitor	12	1	28.6	5.4	metabolic process		catalytic activity	Pf02682		AYJ08_11930			0.989	0.999809
A0A075RBD5	Cu_amine_oxidN1 domain-containing protein	50	13	27.6	5.02				Pf07833		BRLA_c042630			0.988	0.998804
dnaK	Chaperone protein DnaK	14	10	65.6	5									0.986	0.999809
A0A075R4B5	PSP1 C-terminal domain-containing protein	14	3	30.6	5.39				Pf04468	34876014	BRLA_c000550	BRLA_RS00280		0.986	0.999809
A0A177XTN9	Ribose-5-phosphate isomerase	53	7	16.4	6.38	metabolic process		catalytic activity	Pf02502		AYJ08_03420			0.986	0.994852
A0A177XGN1	Flagellin	57	25	41.2	6.23	cellular component movement	extracellular	structural molecule activity	Pf00669, Pf00700		AYJ08_18340			0.984	0.994852
A0A2S5HGB1	Succinate dehydrogenase iron-sulfur subunit	43	9	28	7.97									0.984	0.994852
H0U609	Hemerythrin HHE cation binding domain protein	14	2	20.3	5.58				Pf01814		BLGI_797			0.984	0.994852
nadC	Quinolinate phosphoribosyltransferase [decarboxylating]	10	2	30.8	6.62									0.984	0.999809
icmF	Fused isobutyryl-CoA mutase	21	19	121.4	5.66									0.984	0.994852
gltX	Glutamate--tRNA ligase	8	4	55.9	5.52									0.983	0.994852
A0A2S5H3U8	Beta sliding clamp	30	11	42	5.39									0.983	0.994852
A0A542RJF4	RNA polymerase sigma-70 factor (ECF subfamily)	5	1	20.8	6.8									0.983	0.999809
A0A0F7BZC2	Pur operon repressor	4	1	30.4	5.87	metabolic process;regulation of biological process		DNA binding	Pf00156, Pf09182					0.982	0.999809
ypwA	Metal-dependent carboxypeptidase	43	19	58.5	5.57									0.982	0.994852
pheS	Phenylalanine--tRNA ligase alpha subunit	18	7	39	5.88									0.98	0.994852
A0A0F7EET0	Ferredoxin--NADP reductase	48	11	37.3	6.54	metabolic process		catalytic activity;nucleotide binding	Pf00070, Pf03486, Pf07992, Pf12831, Pf13450, Pf13738					0.979	0.994852
mntR	HTH-type transcriptional regulator MntR	37	4	17.4	5.2									0.979	0.999809
A0A075QZK9	L-lysine-8-amino-7-oxononanoate aminotransferase	18	7	52.4	7.18	metabolic process		catalytic activity	Pf00202, Pf01212		BRLA_c014520			0.978	0.994852
ahcY	Adenosylhomocysteinase	14	7	46.1	5.49									0.978	0.994852
A0A075R0X1	Cobalt-precorrin-2 C(20)-methyltransferase	8	2	28.4	5.69	metabolic process		catalytic activity	Pf00590	34877088	BRLA_c011940	BRLA_RS05860	Porphyrin and chlorophyll metabolism; Metabolic pathways	0.978	0.999809
psuG	Pseudouridine-5'-phosphate glycosidase	29	5	33.1	5.22									0.977	0.994852
H0U9G3	Haloacid dehalogenase-like hydrolase family protein	4	1	43.9	4.78			catalytic activity	Pf00702, Pf13242, Pf13419		BLGI_2200			0.977	0.999809
A0A553KTS0	Glutamate dehydrogenase	14	5	47.6	6.47									0.976	0.999809
A0A3M8BAE0	DUF342 domain-containing protein	2	1	51.1	5.88									0.976	0.999809
dnaK	Chaperone protein DnaK	14	10	65.9	5.05									0.975	0.994852
J3A2T1	Putative S-layer protein	1	1	84.3	5.6				Pf00395		PMI05_03604			0.975	0.994852
ilvD	Dihydroxy-acid dehydratase	19	11	59.5	6.33									0.974	0.994852
A0A385TCJ7	Uncharacterized protein	8	1	14	4.87									0.972	0.999809
ppaC	Probable manganese-dependent inorganic pyrophosphatase	62	17	33.9	5.01									0.972	0.994852
A0A177XL35	UPF0358 protein AYJ08_10890	8	1	9.9	4.7				Pf07408		AYJ08_10890			0.971	0.999809
A0A385TD03	Cell division protein FtsX	3	1	33.2	8.24									0.971	0.999809
atpF	ATP synthase subunit b	63	12	18.9	5.38									0.97	0.994852
A0A0Q3SXP3	Serine protease	1	1	93.2	8.97	metabolic process		catalytic activity	Pf00082, Pf00395		AN963_16590			0.97	0.994852
A0A2S5HTF1	Uncharacterized protein	3	1	41.9	7.12									0.969	0.999809
A0A177XHZ9	Enoyl-ACP reductase	27	6	27.3	5.95			catalytic activity	Pf00106, Pf01370, Pf08659, Pf13561		AYJ08_01145			0.968	0.994852
A0A075QYZ5	Stage 0 sporulation protein KA	50	34	61.5	6	transport			Pf00496	34875958	BRLA_c004130	BRLA_RS02045	ABC transporters; Quorum sensing; beta-Lactam resistance	0.968	0.994852
glmM	Phosphoglucosamine mutase	6	2	48	5.05									0.968	0.999809
dapF	Diaminopimelate epimerase	3	1	31.5	5.25									0.968	0.999809
A0A0F7EEW5	D-ribose transporter subunit RbsB	19	5	32.2	5.62				Pf00532, Pf13377, Pf13407, Pf13458					0.968	0.994852
A0A2S5H6G1	GntP family permease	3	1	42.7	9.5									0.967	0.999809
A0A0Q3SP09	S1 motif domain-containing protein	3	2	79.9	5.76	metabolic process			Pf00575, Pf09371, Pf12836, Pf14635, Pf14639		AN963_28525			0.967	0.999809
nuoD	NADH-quinone oxidoreductase subunit D	29	8	42.5	6.46									0.967	0.994852
infC	Translation initiation factor IF-3	33	5	19.4	9.39									0.967	0.994852
A0A075R936	Stage 0 sporulation protein KE	32	8	36.2	7.18	transport		catalytic activity;nucleotide binding	Pf00005, Pf08352		BRLA_c017510		ABC transporters; Quorum sensing; beta-Lactam resistance	0.967	0.994852
A0A291BQ60	Peptide ABC transporter substrate-binding protein	3	3	62.1	5.52									0.966	0.994852
A0A177XRM2	Uncharacterized protein (Fragment)	13	2	28.1	5.19						AYJ08_21260			0.966	0.999809
A0A177XS67	Flagellar M-ring protein	3	1	58.4	5.03	cellular component movement	membrane	catalytic activity;motor activity	Pf01514, Pf08345		AYJ08_04615			0.965	0.999809
sucC	Succinate--CoA ligase [ADP-forming] subunit beta	75	26	41.6	5.07									0.965	0.994504
M8DCN5	Methyl-accepting chemotaxis sensory transducer with cache sensor	5	2	62.6	4.97	regulation of biological process;response to stimulus	membrane	signal transducer activity	Pf00015, Pf00672, Pf08269		I532_18347			0.965	0.999809
A0A177XJ58	Acyl-CoA dehydrogenase	33	11	41.3	6.65	metabolic process		catalytic activity;nucleotide binding	Pf00441, Pf02770, Pf02771, Pf08028		AYJ08_16550			0.964	0.992518
A0A075R850	Chaperone protein DnaJ	24	6	41.4	8.05	metabolic process;response to stimulus	cytoplasm	metal ion binding;nucleotide binding;protein binding	Pf00226, Pf00684, Pf01556	34878561	BRLA_c013960	BRLA_RS06840		0.964	0.992518
A0A075RGE0	Peptidylprolyl isomerase	42	7	23.9	5.81			catalytic activity	Pf13624		BRLA_c040130			0.964	0.992518
mtnE	Aminotransferase class I and II family protein	13	4	43.5	5.95									0.964	0.994852
A0A0F6XYN3	Polysaccharide pyruvyl transferase	4	1	41.1	6.8			catalytic activity	Pf04230					0.964	0.999809
ispG	4-hydroxy-3-methylbut-2-en-1-yl diphosphate synthase (flavodoxin)	33	9	38.4	5.54									0.962	0.984909
A0A6M1UBW1	MFS transporter	2	1	45.6	9.26									0.962	0.999809
cysS	Cysteine--tRNA ligase	2	1	53.6	5.24									0.962	0.999809
A0A177XQ82	AraC family transcriptional regulator	6	1	21.2	7.05				Pf01965, Pf13278		AYJ08_08215			0.962	0.999809
nuoC	NADH-quinone oxidoreductase subunit C	19	5	41	5.33									0.961	0.994852
A0A518V4S3	Zinc ABC transporter substrate-binding protein	3	1	36.2	5.16									0.961	0.994852
smpB	SsrA-binding protein	4	1	18.4	10.1									0.96	0.999809
A0A0F6Y0A7	Uncharacterized protein	17	2	16.2	10.61		membrane							0.96	0.994852
nab	UPF0109 protein BLGI_1923	17	1	8.2	9.19									0.96	0.994852
A0A3E0RI50	Menaquinone biosynthesis decarboxylase	2	1	66.2	6.49									0.959	0.999809
A0A177XKC8	Quinol oxidase subunit 1	2	1	73	9.14	metabolic process;transport	membrane	catalytic activity;metal ion binding;transporter activity	Pf00115		AYJ08_12850			0.959	0.999809
A0A075R686	PKS domain-containing protein	3	4	173.9	5.38	metabolic process		catalytic activity	Pf00106, Pf00108, Pf00109, Pf00550, Pf00698, Pf02801, Pf08659	34877920	BRLA_c023470	BRLA_RS11400		0.959	0.998804
A0A075RA05	LL-diaminopimelate aminotransferase	14	4	43.5	5.99	metabolic process		catalytic activity	Pf00155	34877728	BRLA_c039280	BRLA_RS18960	Metabolic pathways; Cysteine and methionine metabolism	0.958	0.999809
A0A385TC88	Pyridoxal phosphate-dependent aminotransferase	14	4	43.5	6.39									0.958	0.999809
A0A542SHF4	Uncharacterized protein	10	1	9.3	8.13									0.958	0.978052
A0A518VBD9	Amino acid adenylation domain-containing protein	1	1	151.9	5.2									0.958	0.999809
A0A0F7C1F2	Metallopeptidase	2	1	38.7	5.07			catalytic activity	Pf00557, Pf01321					0.958	0.999809
A0A2S5HIC9	Peptidase_M56 domain-containing protein	1	1	87.4	7.81									0.957	0.996535
H0U9J1	Uncharacterized protein	6	1	20.7	5.66						BLGI_2229			0.957	0.999809
ispF	2-C-methyl-D-erythritol 2,4-cyclodiphosphate synthase	11	1	16.8	5.8									0.957	0.999809
A0A0F6XZE1	Hypoxanthine phosphoribosyltransferase	27	5	20.3	5.31	metabolic process	cytoplasm	catalytic activity;metal ion binding;nucleotide binding	Pf00156					0.956	0.969339
prs	Ribose-phosphate pyrophosphokinase	32	9	34.5	6.65									0.956	0.969012
qcrA	Rieske [2Fe-2S] domain protein	27	5	18.9	7.36									0.956	0.966817
yufQ	Branched-chain amino acid transport system / permease component family protein	24	6	33.7	9.42									0.955	0.965145
A0A656ZM74	Transcriptional regulator	4	1	25.2	6.25									0.954	0.999809
rplS	50S ribosomal protein L19	30	5	13.5	10.95									0.954	0.962599
ileS	Isoleucine--tRNA ligase	28	19	105.8	5.4									0.954	0.961692
oppD	Oligopeptide/dipeptide ABC transporter, ATP-binding, C-terminal domain protein	50	11	36.5	6.92									0.954	0.961001
A0A0F7C0R8	Cobalt ABC transporter permease	7	1	28.5	9.91		membrane		Pf02361					0.953	0.999809
A0A385TAT0	Flagellin	61	27	41.4	6.47									0.953	0.958914
A0A177XJN1	Uncharacterized protein	19	7	50.1	6.71	metabolic process	membrane	catalytic activity	Pf00202, Pf01212		AYJ08_14150			0.952	0.999809
mnmE	tRNA modification GTPase MnmE	3	1	51.1	5.03									0.951	0.999809
A0A385T722	Methyltransferase domain-containing protein	4	1	32.6	6.8									0.951	0.953549
cbiG	Cobalamin biosynthesis protein CbiG	17	4	43.9	5.48									0.951	0.999809
A0A656ZXY8	Oligopeptidase PepB	5	3	68.7	5.22									0.95	0.994852
A0A177XIM9	Nitrate ABC transporter ATP-binding protein	3	1	25.9	8.63			catalytic activity;nucleotide binding	Pf00005, Pf13304		AYJ08_18485			0.95	0.999809
gatC	Aspartyl/glutamyl-tRNA(Asn/Gln) amidotransferase subunit C	18	2	11	5.1									0.95	0.999809
A0A075R5X7	Uncharacterized protein	4	1	25.4	9.06					34877321	BRLA_c029000	BRLA_RS14090		0.95	0.994852
hppD	4-hydroxyphenylpyruvate dioxygenase	47	19	41.1	5.08									0.949	0.953549
A0A0F7EGN5	Acetyltransferase	15	2	23.7	6.3			catalytic activity	Pf00583, Pf13302, Pf13523, Pf13673					0.949	0.994852
A0A075QZT0	Malate synthase	14	7	61.2	5.3	metabolic process		catalytic activity	Pf01274	34877366	BRLA_c000330	BRLA_RS00165	Carbon metabolism; Biosynthesis of secondary metabolites; Glyoxylate and dicarboxylate metabolism; Metabolic pathways; Pyruvate metabolism; Microbial metabolism in diverse environments	0.948	0.953549
mreB	Cell shape-determining protein MreB	18	6	37.1	6.29									0.948	0.953549
A0A2S5HCH3	Non-ribosomal peptide synthetase	5	24	735.4	5.14									0.948	0.994852
mmgB	3-hydroxyacyl-CoA dehydrogenase, NAD binding domain protein	14	3	31.3	5.88									0.948	0.951484
aceB	Malate synthase	13	6	57.9	5.67									0.947	0.998804
H0UBY5	CbiX family protein	3	1	28.1	4.97	metabolic process		catalytic activity	Pf00762, Pf01903, Pf06180		BLGI_2908			0.947	0.94881
A0A0K2FLZ4	Putative structural protein	2	1	36.1	5.4					26613769		AVT09_gp023		0.947	0.94881
apt	Adenine phosphoribosyltransferase	22	2	18.5	4.93									0.946	0.999809
A0A0F7EEP3	Membrane protein	10	3	40.9	8.48		membrane		Pf04519					0.945	0.94811
H0U511	Uncharacterized protein	16	7	57.7	6.05						BLGI_428			0.945	0.945248
A0A2S5HR50	Methylmalonyl Co-A mutase-associated GTPase MeaB	8	2	34.5	6.39									0.945	0.998804
pepT	Peptidase T	33	9	45.6	5.15									0.945	0.945248
A0A177XMJ7	Quinol oxidase subunit 3	21	3	22.5	7.61	metabolic process;transport	membrane	catalytic activity;transporter activity	Pf00510		AYJ08_12845			0.944	0.973399
A0A177XK03	Aldo/keto reductase	45	15	39.2	5.83				Pf00248		AYJ08_12290			0.944	0.94229
pbpB	Penicillin-binding Protein dimerisation domain protein	4	1	82.5	9.35									0.943	0.999809
A0A4U2YEH1	Aldehyde dehydrogenase family protein	2	1	52.3	5.52									0.943	0.994852
ssb	Single-stranded DNA-binding protein	28	3	17	5.68									0.942	0.940861
khtT	K(+)/H(+) antiporter subunit khtT	25	3	18.5	5.3									0.942	0.978052
greA	Transcription elongation factor GreA	18	2	17.3	4.68									0.942	0.994852
pnp	Polyribonucleotide nucleotidyltransferase	42	25	77.6	5.14									0.942	0.940651
A0A1A5XJI5	Radical SAM protein	2	1	47.4	5.05			catalytic activity	Pf04055		A6764_12215			0.942	0.999809
A0A177XR99	Xaa-Pro dipeptidase	10	2	39.5	5.62			catalytic activity	Pf00557, Pf01321		AYJ08_03900			0.942	0.999809
A0A0F6XZ55	ABC transporter permease	11	2	30.4	9.35	transport	membrane		Pf12679					0.941	0.994852
pdxT	Pyridoxal 5'-phosphate synthase subunit PdxT	9	2	21.9	6.89									0.941	0.994852
fmt	Methionyl-tRNA formyltransferase	16	5	34.6	6.43									0.94	0.939453
A0A177XKJ3	ABC transporter ATP-binding protein	16	5	34.1	7.12			catalytic activity;nucleotide binding	Pf00005, Pf13304, Pf13558		AYJ08_13075			0.94	0.939453
trpS	Tryptophan--tRNA ligase	28	7	37.1	5.6									0.94	0.967773
A0A0F6Y086	Putative pyruvate, phosphate dikinase regulatory protein	23	5	30.9	5.86	metabolic process		catalytic activity;nucleotide binding	Pf03618					0.939	0.939453
pyrH	Uridylate kinase	15	3	25.7	5.34									0.939	0.939453
A0A502IKH4	Uncharacterized protein	2	1	93.6	9.63									0.939	0.999809
A0A0F7C0Z6	Peptidyl-prolyl cis-trans isomerase	42	5	15.6	6.95	metabolic process		catalytic activity	Pf00160					0.939	0.939453
A0A075RE38	3-oxoacyl-[acyl-carrier-protein] reductase	35	6	26.5	5.77	metabolic process		catalytic activity;nucleotide binding	Pf00106, Pf08659, Pf13561	34878651	BRLA_c033430	BRLA_RS16150	Metabolic pathways; Biosynthesis of unsaturated fatty acids; Biotin metabolism; Fatty acid biosynthesis; Fatty acid metabolism	0.938	0.939453
talC	Probable transaldolase	74	12	23.5	5.47									0.938	0.939453
hmp	Flavohemoprotein	18	6	45.1	6.3									0.937	0.939453
A0A177XGA2	Fe-S_biosyn domain-containing protein	8	1	12.8	4.6	metabolic process		structural molecule activity	Pf01521		AYJ08_01925			0.937	0.994852
A0A0F7EI55	GTP cyclohydrolase 1 type 2 homolog	4	1	40.9	6.01				Pf01784					0.936	0.994852
A0A075R0C2	Putative membrane protein	12	6	55.6	8.81		membrane			34874776	BRLA_c009530	BRLA_RS04685		0.935	0.938011
A0A2S5H174	Transcriptional regulator	6	1	23.2	6.06									0.935	0.999809
A0A177XK69	Nitroreductase	13	3	23.1	6.4	metabolic process;response to stimulus		catalytic activity	Pf00881		AYJ08_13320			0.935	0.994852
A0A0F6Y0Y5	Sodium ABC transporter ATP-binding protein	4	1	33.1	6.19			catalytic activity;nucleotide binding	Pf00005, Pf13304					0.934	0.999809
A0A502IYZ7	DinB family protein	20	2	17.5	6.06									0.933	0.953549
A0A075R3R9	Flagellin	59	27	41.3	6.01	cellular component movement	extracellular	structural molecule activity	Pf00669, Pf00700	34878198	BRLA_c028680	BRLA_RS13960	Two-component system; Flagellar assembly	0.933	0.929734
H0U8D4	Radical SAM superfamily protein	31	12	49.3	7.12			catalytic activity;metal ion binding	Pf04055, Pf13186, Pf13353, Pf13394		BLGI_1646			0.933	0.94881
deoB	Phosphopentomutase	35	9	43.2	5.58									0.933	0.92966
V6MDL0	Oligopeptidase PepB	6	3	69.1	5.54	metabolic process		catalytic activity;metal ion binding	Pf01432, Pf08439		T458_01385			0.932	0.928506
metG	Methionine--tRNA ligase	27	14	77.3	5.78									0.932	0.928506
rpoC	DNA-directed RNA polymerase subunit beta'	42	44	134.7	8.47									0.932	0.928506
A0A0K9Z062	Aminopeptidase	4	2	42.2	5.35	metabolic process		catalytic activity	Pf02073		ADS79_00780			0.932	0.92834
A0A177XFV4	TRAM domain-containing protein	17	4	39.7	5.82		membrane		Pf01850, Pf13638, Pf14367		AYJ08_18840			0.931	0.925494
A0A075RC45	UPF0173 metal-dependent hydrolase BRLA_c027510	8	2	25.2	6.58			catalytic activity	Pf00753, Pf12706, Pf13483	34877019	BRLA_c027510	BRLA_RS13385		0.931	0.925407
A0A2S5I516	Nitroreductase	14	2	21.2	6.8									0.931	0.994852
A0A075RBI2	RNA polymerase sigma-W factor	5	1	24.4	7.52	metabolic process;regulation of biological process		DNA binding	Pf04542, Pf04545, Pf07638, Pf08281	34875733	BRLA_c043090	BRLA_RS20795		0.931	0.994852
A0A177XTP1	Homogentisate 1,2-dioxygenase	2	1	44.6	6.32	metabolic process		catalytic activity;metal ion binding	Pf00190, Pf04209, Pf07883		AYJ08_00045			0.93	0.945248
ndk	Nucleoside diphosphate kinase	44	5	16.3	5.92									0.929	0.918259
H0UFI0	Lipoprotein	32	6	30.7	5.58				Pf03180		BLGI_4182			0.929	0.918259
atpG	ATP synthase gamma chain	63	14	32	9.25									0.929	0.918259
A0A2S5HCW5	DUF4446 domain-containing protein	7	1	19	7.43									0.929	0.994852
tycC2	Tyrocidine synthase 3	14	65	734.8	5.26									0.929	0.918259
A0A177XIB4	Superoxide dismutase	27	3	22.2	5.85	metabolic process;response to stimulus		antioxidant activity;catalytic activity;metal ion binding	Pf00081, Pf02777		AYJ08_01170			0.929	0.917873
A0A075R5E8	NRPS domain-containing protein	9	7	122.4	5.71	metabolic process		catalytic activity	Pf00501, Pf00550, Pf00668, Pf13193	34874856	BRLA_c023760	BRLA_RS11535	Nonribosomal peptide structures	0.929	0.941378
divIVA	Septum site-determining protein divIVA	56	10	18.9	5									0.929	0.917873
A0A502HLW3	Homocysteine synthase	6	2	46.7	6.11									0.928	0.980545
A0A177XK07	Uncharacterized protein	16	5	58.5	5.07						AYJ08_17335			0.928	0.940861
ligA	DNA ligase	3	2	74.6	5.21									0.928	0.994852
A0A0F7EG47	L-lysine 2,3-aminomutase	24	8	52.2	6.55			catalytic activity;metal ion binding	Pf04055, Pf12544					0.927	0.994852
A0A385TBF7	DUF1802 family protein	13	2	22.8	5.64									0.926	0.994852
A0A2S5HXP0	ABC transporter permease	46	9	34.4	9.36									0.926	0.917873
A0A0F6XZN2	IclR family transcriptional regulator	4	1	27.4	8.12	metabolic process;regulation of biological process		DNA binding	Pf01047, Pf01614, Pf09339, Pf12802					0.925	0.994852
qcrB	Menaquinol-cytochrome c reductase cytochrome b subunit	46	9	25.2	7.3									0.924	0.917873
A0A3E0RBY1	Potassium uptake system protein	4	1	23.9	5.21									0.924	0.986095
A0A502IJE9	Uncharacterized protein	18	5	28.9	4.63									0.923	0.987301
A0A2S5HSJ5	Uncharacterized protein	0	1	298.6	5.38									0.923	0.939453
pepQ	Metallopeptidase M24 family protein	24	2	12.7	4.88									0.922	0.910498
A0A177XKD7	Carboxylase	24	10	56.3	6.33			catalytic activity	Pf01039, Pf06833		AYJ08_12390			0.921	0.906291
A0A3M8AP75	Acyl-CoA dehydrogenase	9	4	65.2	5.41									0.921	0.939453
A0A502IRF7	Metal-dependent carboxypeptidase	17	9	58.6	5.5									0.92	0.903031
argC	N-acetyl-gamma-glutamyl-phosphate reductase	28	5	38.6	7.11									0.92	0.994852
murC	UDP-N-acetylmuramate--L-alanine ligase	10	4	51.6	5.88									0.92	0.953549
A0A4U2YAN4	Helix-turn-helix transcriptional regulator	2	1	50.1	6.32									0.919	0.961001
efp	Elongation factor P	14	3	20.7	5.39									0.918	0.897961
A0A075R2Y4	UPF0365 protein BRLA_c014120	34	9	35.6	5.29		membrane		Pf12127	34877390	BRLA_c014120	BRLA_RS06920		0.918	0.897961
rimM	Ribosome maturation factor RimM	9	1	19.6	5.43									0.918	0.994852
ilvC	Ketol-acid reductoisomerase (NADP(+))	47	16	37.7	5.58									0.918	0.897961
A0A0F7EEC9	Fatty-acid--CoA ligase	29	11	60.6	6.07	metabolic process		catalytic activity	Pf00501, Pf13193					0.917	0.929734
A0A502IEU4	Cytochrome c	23	3	14	7.97									0.917	0.897961
plsY	Glycerol-3-phosphate acyltransferase	7	1	22.4	9.67									0.916	0.994852
A0A518V2Y3	Uncharacterized protein	8	1	25.8	5.34									0.915	0.994852
A0A2S5HQ30	HD domain-containing protein	2	1	51.4	6.49									0.915	0.994852
H0U9S8	Tetratricopeptide repeat family protein	3	1	36.5	4.51			protein binding	Pf13432, Pf14559		BLGI_2078			0.914	0.994852
A0A177XRV5	Peptidyl-prolyl cis-trans isomerase	31	3	15.6	6.73	metabolic process		catalytic activity	Pf00160		AYJ08_05355			0.914	0.994852
A0A177XTF0	Methylmalonyl-CoA epimerase	16	3	30.9	5.14			catalytic activity;metal ion binding	Pf00903, Pf02310, Pf12681, Pf13669		AYJ08_20365			0.914	0.986095
truB	tRNA pseudouridine synthase B	6	1	34.6	7.28									0.913	0.994852
A0A502HTQ6	Uncharacterized protein	24	2	8.1	4.65									0.913	0.882867
lexA	LexA repressor	10	1	23.2	5.68									0.913	0.994852
H0UAR9	Surface layer protein	64	98	121.2	5.4			catalytic activity	Pf02784		BLGI_2489			0.912	0.881448
rny	Ribonuclease Y	23	13	58.3	5.62									0.912	0.879713
alaS	Alanine--tRNA ligase	29	16	97.2	5.07									0.912	0.994852
M8DB86	MazG domain-containing protein	24	2	13.5	4.75				Pf03819		I532_06110			0.911	0.961001
A0A2S5H468	Acyl-CoA thioesterase	10	1	16.2	6.01									0.909	0.897961
A0A075R4V0	Uncharacterized protein	26	4	27.1	7.52					34875127	BRLA_c018860	BRLA_RS09215		0.909	0.953549
grsB	Gramicidin S synthase 2	1	3	508.4	5.08									0.908	0.917873
A0A075RA13	2-hydroxy-3-oxopropionate reductase	19	5	33.6	5.4	metabolic process		catalytic activity;nucleotide binding	Pf02737, Pf03446, Pf03807, Pf14833	34877539	BRLA_c038030	BRLA_RS18370		0.907	0.868818
A0A075R869	Putative siderophore-binding lipoprotein YfiY	17	4	37.4	7.99	metabolic process		catalytic activity	Pf00148, Pf01497	34875779	BRLA_c044930	BRLA_RS21715	ABC transporters	0.906	0.994852
A0A0F7EFH0	Uncharacterized protein	4	1	49.3	7.37	metabolic process;regulation of biological process		catalytic activity;DNA binding	Pf00478, Pf00571, Pf03061, Pf07085, Pf07905, Pf13622					0.906	0.994852
atpA	ATP synthase subunit alpha	53	24	54.5	5.86									0.905	0.867173
A0A3M8DNA9	HD domain-containing protein	2	1	42.5	5.47									0.905	0.865776
asd	Aspartate-semialdehyde dehydrogenase	38	7	37.7	6.14									0.905	0.864562
A0A2S5H893	Transcriptional repressor	14	2	17.9	6.58									0.904	0.939453
etfB	Electron transfer flavoprotein small subunit EtfB	56	11	27.5	4.59									0.904	0.864392
etfA	Electron transfer flavoFAD-binding domain protein	64	11	33.6	5.33									0.903	0.864382
A0A4Y4HVE4	Malate dehydrogenase	12	2	33.4	5.58									0.903	0.994852
lgt	Phosphatidylglycerol--prolipoprotein diacylglyceryl transferase	4	1	30	9									0.902	0.945248
A0A177XJJ0	Alcohol dehydrogenase	6	2	36.8	6.29	metabolic process		catalytic activity	Pf00107, Pf08240, Pf13602		AYJ08_13440			0.902	0.915386
A0A0F7EGX4	3-hydroxyisobutyryl-CoA hydrolase	2	1	39.4	5.58	metabolic process		catalytic activity	Pf00378, Pf13766					0.9	0.879713
H0UAS4	Hydrolase_4 domain-containing protein	10	2	31	5.38	metabolic process		catalytic activity	Pf00326, Pf12695, Pf12697		BLGI_2497			0.9	0.989215
ispF	2-C-methyl-D-erythritol 2,4-cyclodiphosphate synthase	17	2	16.7	5.49									0.899	0.953549
A0A075QVH3	Uncharacterized protein	21	2	11.8	8.19				Pf06153	34875982	BRLA_c000520	BRLA_RS00265		0.898	0.853115
yhdA	NADPH-dependent FMN reductase family protein	7	1	19.6	6.55									0.897	0.980206
A0A075R0Q0	Stage 0 sporulation protein KA	52	24	61.2	5.81	transport			Pf00496	34876093	BRLA_c003480	BRLA_RS01735	ABC transporters; Quorum sensing; beta-Lactam resistance	0.897	0.853115
A0A177XP09	Acyl-CoA dehydrogenase	35	17	65.3	5.52	metabolic process		catalytic activity;nucleotide binding	Pf00441, Pf02770, Pf02771, Pf08028		AYJ08_07500			0.897	0.853115
A0A0F7EFY1	Spermidine/putrescine ABC transporter substrate-binding protein	27	7	39.5	5.31	transport		transporter activity	Pf01547, Pf13343, Pf13416, Pf13531					0.897	0.85156
A0A0F7EI18	Peroxiredoxin	42	4	16.4	5.07				Pf02566					0.897	0.849913
greA	Transcription elongation factor GreA	30	3	17.4	4.64									0.896	0.868644
guaB	Inosine-5'-monophosphate dehydrogenase	11	4	52.3	6.7									0.896	0.994852
A0A0F6XZ41	Uncharacterized protein	20	2	9.2	10.39		membrane							0.896	0.884129
A0A2S5HIW4	PqqD family protein	52	4	10.6	4.48									0.895	0.891093
A0A075R772	2,3-diketo-5-methylthiopentyl-1-phosphate enolase	13	3	43	5.45	metabolic process		catalytic activity;metal ion binding	Pf00016	34877217	BRLA_c041920	BRLA_RS20220	Cysteine and methionine metabolism; Metabolic pathways	0.894	0.951772
A0A502IXI3	CBS domain-containing protein	8	1	16.7	6.35									0.894	0.953549
A0A0F7BYR3	Cytochrome C	23	3	14	8.41	metabolic process	membrane	metal ion binding	Pf00034, Pf13442					0.893	0.834658
A0A075R5L6	Murein hydrolase activator NlpD	19	4	23.3	6.16			catalytic activity	Pf01551	34874848	BRLA_c024210	BRLA_RS11755		0.892	0.858763
H0UHK9	DeoR-like helix-turn-helix domain protein	13	3	32.2	6.47	metabolic process;regulation of biological process		DNA binding	Pf00455, Pf01047, Pf08220, Pf08279, Pf12840, Pf13412		BLGI_4934			0.891	0.834658
A0A0F7EJH8	Endoribonuclease L-PSP	77	6	13.8	5.19				Pf01042					0.89	0.833563
A0A6M1U9I1	Efflux RND transporter permease subunit	1	1	115.5	5.35									0.89	0.953549
A0A0F7C070	RNA methyltransferase TrmH	5	1	27.5	6.81	metabolic process		catalytic activity;RNA binding	Pf00588, Pf08032					0.89	0.940861
A0A075R4C4	NRPS domain-containing protein	13	60	735.2	5.29	metabolic process		catalytic activity	Pf00501, Pf00550, Pf00668, Pf00975, Pf12697, Pf13193, Pf13745	34876225	BRLA_c023740	BRLA_RS11525	Nonribosomal peptide structures	0.89	0.879713
rpoZ	DNA-directed RNA polymerase subunit omega	72	5	7.7	9									0.89	0.830709
rplA	50S ribosomal protein L1	19	4	24.1	9.45									0.887	0.819282
A0A075R180	N-acetylmuramoyl-L-alanine amidase LytC	2	1	68.1	9.26	metabolic process		catalytic activity	Pf01520, Pf06347, Pf08239	34876825	BRLA_c012940	BRLA_RS06360	Cationic antimicrobial peptide (CAMP) resistance	0.887	0.961001
groEL	60 kDa chaperonin	30	19	57.3	4.98									0.886	0.819282
A0A177XH06	Polyketide synthase	3	3	144.6	5.58				Pf00106, Pf00550, Pf00561, Pf08659, Pf12695, Pf12697, Pf14765		AYJ08_18255			0.886	0.940651
argS	Arginine--tRNA ligase	16	7	64.2	5.62									0.886	0.865247
A0A0F7EE89	Ornithine cyclodeaminase	31	9	38.2	6.8				Pf02423					0.886	0.815922
A0A0F7BZ08	Thiol-disulfide oxidoreductase	23	4	17.4	5.22	cellular homeostasis;metabolic process;regulation of biological process		antioxidant activity;catalytic activity	Pf00578, Pf08534, Pf13905					0.886	0.815922
A0A553KT62	ATP-binding cassette domain-containing protein	3	1	29.3	8.35									0.886	0.815922
A0A075RA20	Uncharacterized protein	70	42	49.9	5.86					34877883	BRLA_c039430	BRLA_RS19035		0.886	0.815922
A0A075R2G0	2-oxoisovalerate dehydrogenase subunit beta	34	10	35.7	5.29	metabolic process		catalytic activity	Pf02779, Pf02780	34877001	BRLA_c017250	BRLA_RS08435	Propanoate metabolism; Valine, leucine and isoleucine degradation; Biosynthesis of secondary metabolites; Biosynthesis of antibiotics; Metabolic pathways	0.886	0.815922
A0A075QVG5	Nucleoid-associated protein BRLA_c000420	23	3	11.3	5.24		cytoplasm	DNA binding	Pf02575	34875283	BRLA_c000420	BRLA_RS00215		0.885	0.852936
A0A656ZR58	Flagellar hook-associated protein 2	2	1	54.9	5.92									0.885	0.917873
codY	GTP-sensing transcriptional pleiotropic repressor CodY	12	3	28.9	5.35									0.885	0.910388
A0A075R0U6	Bacillithiol system oxidoreductase, YphP/YqiW family	26	3	15.8	5.02				Pf06491	34878092	BRLA_c004020	BRLA_RS01995		0.885	0.868644
H0U4Z6	ParB domain-containing protein	17	4	29.8	6.24				Pf02195		BLGI_413			0.885	0.814649
brvF	ABC transporter ATP-binding protein	35	6	27	6.18									0.884	0.864392
A0A502IBC2	ParA family protein	11	2	27.2	5.3									0.884	0.939453
A0A3M8DKA1	GGDEF domain-containing protein	1	1	84.4	4.83									0.883	0.940861
A0A177XPJ0	DNA-binding protein	12	2	24.1	9.39			DNA binding	Pf01424, Pf13083, Pf14804		AYJ08_07910			0.882	0.880372
troA	ABC-type metal ion transport system, periplasmic binding protein/surface adhesin	43	13	35.2	6.33									0.882	0.814649
A0A0F7BZ77	Metal-dependent phosphoesterase	5	1	30.8	5.17			catalytic activity	Pf02811					0.882	0.962614
A0A075QZK8	Arylamine N-acetyltransferase	5	1	33.8	6.04	metabolic process		catalytic activity	Pf00797	34875789	BRLA_c006710	BRLA_RS03325		0.881	0.939453
hflX	GTPase HflX	3	1	48.6	5									0.88	0.953549
argH	Argininosuccinate lyase	7	2	54.7	5.54									0.88	0.939453
A0A2S5HW60	2-oxoisovalerate dehydrogenase subunit alpha	23	7	36.1	5.45									0.879	0.806893
A0A177XT37	Amino acid ABC transporter substrate-binding protein	31	6	29.9	6.4	transport		transporter activity	Pf00497, Pf09084, Pf12974		AYJ08_21595			0.879	0.806369
A0A220MHK6	NAGPA domain-containing protein	3	1	39.1	9.83				Pf09992					0.878	0.806369
A0A3M8DAZ6	TPR_REGION domain-containing protein	1	1	91	5.81									0.878	0.929734
accA	Carbamoyl-phosphate synthase L chain, N-terminal domain protein	20	6	49.5	5.21									0.878	0.806369
A0A502II52	S-layer homology domain-containing protein	12	19	122.1	5.25									0.877	0.806369
A0A177XIH9	Uncharacterized protein	2	1	46.1	5.39	metabolic process		catalytic activity	Pf00155, Pf00266, Pf01053, Pf06838		AYJ08_01520			0.877	0.938291
A0A3E0R356	Response regulator	25	3	14.1	5.9									0.876	0.918259
H0U5I6	Putative lipoprotein	25	5	24.5	5.38						BLGI_616			0.876	0.802609
ppsD2	Plipastatin synthase subunit D	14	32	360.3	5.5									0.875	0.801858
fabH	3-oxoacyl-[acyl-carrier-protein] synthase 3	20	5	35.9	5.16									0.875	0.801074
ispG	4-hydroxy-3-methylbut-2-en-1-yl diphosphate synthase (flavodoxin)	20	5	38.9	5.81									0.874	0.931356
xseB	Exodeoxyribonuclease 7 small subunit	13	1	9.6	4.5									0.873	0.92823
ytjP	Dipeptidase, family protein	16	5	53.3	4.98									0.873	0.868644
A0A2S5I523	MarR family transcriptional regulator	6	1	18.7	8.87									0.873	0.939453
A0A177XJ59	Uncharacterized protein	2	1	39.4	9.45	transport	membrane		Pf05977, Pf07690		AYJ08_14880			0.872	0.939453
A0A075R1J0	S-layer homology domain-containing protein	13	6	84.5	6.3				Pf00395	34878902	BRLA_c009300	BRLA_RS04565		0.872	0.79948
fadA	Acetyl-CoA acetyltransferases family protein	44	11	41.3	6.46									0.872	0.79948
A0A075R2I1	Preprotein translocase subunit YajC	67	6	12	8.47		membrane		Pf02699, Pf03430	34878172	BRLA_c012810	BRLA_RS06295	Bacterial secretion system; Quorum sensing; Protein export	0.871	0.796539
A0A075RBQ6	Hexagonal wall protein	76	124	121.2	5.45				Pf00395	34875520	BRLA_c043990	BRLA_RS21245		0.871	0.796384
flgE	Flagellar hook protein flgE	27	5	28.2	4.89									0.87	0.79948
A0A075R9H4	Alpha-ribazole phosphatase CobZ	6	1	21.6	5.1	metabolic process		catalytic activity	Pf04608	34877566	BRLA_c037460	BRLA_RS18110		0.87	0.923213
A0A075R6Q9	Putative thioesterase domain protein	6	1	16.6	6.52				Pf09500, Pf14539	34878669	BRLA_c040100	BRLA_RS19355		0.868	0.899474
A0A177XPN4	DNA-binding protein	33	13	48.7	6.54	transport		DNA binding;protein binding	Pf01381, Pf12844, Pf12895, Pf13424, Pf13560		AYJ08_22505			0.867	0.785844
A0A502IDN0	DUF4870 domain-containing protein	33	2	11.6	9.48									0.866	0.899088
rbsC1	Branched-chain amino acid transport system / permease component family protein	13	3	32	8.92									0.865	0.776789
A0A385TB22	Accessory Sec system S-layer assembly protein	2	1	36.9	5.62									0.865	0.917873
M8DF17	Methyl-accepting chemotaxis protein	6	2	34.7	4.98	regulation of biological process;response to stimulus	membrane	signal transducer activity	Pf00015		I532_14253			0.863	0.908105
A0A075R760	Sulfite reductase	2	1	60.5	6.49	metabolic process		catalytic activity;metal ion binding	Pf01077, Pf03460	34875223	BRLA_c010900	BRLA_RS05335	Nitrogen metabolism; Microbial metabolism in diverse environments	0.863	0.953549
A0A0F7BYH7	Cell shape-determining protein MreC	4	1	38.3	9.38	regulation of biological process			Pf04085					0.863	0.939453
A0A0F7C1Q9	Bacitracin synthetase	2	3	289.9	5.45	metabolic process		catalytic activity	Pf00501, Pf00550, Pf00668, Pf13193, Pf13745					0.863	0.939453
A0A075R803	NRPS domain-containing protein	1	2	300.8	5.74	metabolic process;regulation of biological process		catalytic activity	Pf00501, Pf00550, Pf00668, Pf13193, Pf13745	34875416	BRLA_c036820	BRLA_RS17790	Nonribosomal peptide structures; Quorum sensing	0.863	0.939453
H0U879	ArsC family related protein	17	2	13.4	7.12	cellular homeostasis;regulation of biological process		catalytic activity	Pf00462, Pf03960		BLGI_1591			0.863	0.864382
A0A502IG79	2',3'-cyclic-nucleotide 2'-phosphodiesterase/3'-nucleotidase	26	17	90.3	5.2									0.862	0.779324
atpH	ATP synthase subunit delta	55	9	19.7	5.92									0.862	0.766232
clpE	ATP-dependent Clp protease ATP-binding subunit ClpE	3	2	79	5.97									0.861	0.761989
adk	Adenylate kinase	20	4	23.9	5.35									0.861	0.760809
ymfH	Insulinase family protein	10	4	49.5	5.08									0.859	0.814649
H0U6K5	Acetyltransferase family protein	7	1	16.8	5.39			catalytic activity	Pf00583, Pf13420, Pf13508, Pf13673		BLGI_995			0.859	0.901582
A0A502IKM0	Cytochrome c	8	1	11.7	5.48									0.858	0.753399
A0A0F7C0E0	Uncharacterized protein	8	2	27.3	9.1									0.858	0.897393
rimP	Ribosome maturation factor RimP	23	2	17.2	4.77									0.856	0.897961
A0A177XN21	Peptidase M20	2	1	43	5.29	metabolic process		catalytic activity	Pf01546, Pf07687		AYJ08_06550			0.856	0.899901
A0A177XR15	Aldehyde-alcohol dehydrogenase	30	18	95.6	6.44	metabolic process		catalytic activity;metal ion binding	Pf00171, Pf00465, Pf13685		AYJ08_07275			0.855	0.874498
A0A177XNJ1	Peptidase S9	3	1	80.3	7.08	metabolic process		catalytic activity	Pf00326, Pf00930, Pf01738, Pf02129, Pf05448, Pf07676, Pf12695, Pf12697		AYJ08_06565			0.854	0.915291
bdbD	Thiol-disulfide oxidoreductase BdbD	16	4	28.2	7.88									0.852	0.722677
A0A2S5HBR9	2-oxoacid ferredoxin oxidoreductase	48	10	31.1	6.93									0.852	0.720288
A0A177XH23	Thioredoxin domain-containing protein	19	3	23.7	5.74	cellular homeostasis;metabolic process;regulation of biological process	membrane	antioxidant activity;catalytic activity	Pf00578, Pf02630, Pf08534		AYJ08_17580			0.849	0.801074
A0A553KE55	Electron transfer flavoprotein subunit alpha/FixB family protein	8	1	34.5	6.79									0.849	0.874498
A0A177XI36	Diguanylate cyclase	2	2	114.6	5.5				Pf00563, Pf00990, Pf08448, Pf13426		AYJ08_01900			0.848	0.879713
A0A2S5HJ64	Serine hydrolase	1	1	60.6	6.09									0.847	0.864392
A0A075R6K6	Enamine/imine deaminase	51	5	13.7	5.82			catalytic activity	Pf01042	34876590	BRLA_c027770	BRLA_RS13515		0.847	0.900075
cstA	Carbon starvation protein A	5	3	74.7	8.97									0.847	0.834658
A0A177XIE0	N-acetylmuramoyl-L-alanine amidase	4	2	62.7	6.51	metabolic process		catalytic activity	Pf01520, Pf07833, Pf11741		AYJ08_17680			0.846	0.865247
rpoB	DNA-directed RNA polymerase subunit beta	49	44	131.5	5.45									0.846	0.695909
A0A0F7BYT2	Peroxiredoxin	16	2	17.5	6.28	cellular homeostasis;metabolic process;regulation of biological process		antioxidant activity;catalytic activity	Pf00578, Pf08534					0.846	0.849857
A0A075RH29	Immune inhibitor A	8	5	86.1	4.77	metabolic process		catalytic activity	Pf05547		BRLA_c042450			0.845	0.685978
tycC1	Tyrocidine synthase 3	5	10	296.1	5.24									0.844	0.685259
A0A0F6XZI9	Aspartokinase	5	2	50.7	5.4	metabolic process		catalytic activity	Pf00696					0.844	0.868644
A0A517IGM4	AAA family ATPase	2	1	49.3	6.29									0.844	0.834658
A0A3M8B5Y0	Metal-dependent carboxypeptidase	4	1	57.9	5.38									0.841	0.864392
A0A3M8DAY0	TPR_REGION domain-containing protein	3	1	36.5	4.88									0.841	0.879713
murB	UDP-N-acetylenolpyruvoylglucosamine reductase	5	1	32.3	7.96									0.84	0.864382
pdhA	Pyruvate dehydrogenase E1 component subunit alpha	51	13	40.2	5.5									0.839	0.737575
rph	Ribonuclease PH	17	4	26.7	5.54									0.839	0.659083
ppsD	Plipastatin synthase subunit D	10	18	288.2	5.38									0.839	0.832175
ampS	Thermophilic metalloprotease family protein	14	4	42.1	5.16									0.839	0.785696
def	Peptide deformylase	7	1	17.9	5.02									0.836	0.845736
A0A075RFD2	Uncharacterized protein	13	6	60.9	5.27			catalytic activity	Pf07819	34879129	BRLA_c037450	BRLA_RS18105		0.834	0.654449
A0A2S5H7C7	DD-transpeptidase	3	2	93.4	6.04									0.834	0.844365
A0A0F7EGZ5	3-oxoacyl-[acyl-carrier-protein] synthase 2	18	4	44.3	5.64	metabolic process		catalytic activity	Pf00109, Pf02801					0.834	0.647446
A0A502IT30	Nucleotide pyrophosphohydrolase	25	2	13	4.73									0.833	0.909204
A0A075R7T2	Outer cell wall protein	9	12	115.8	4.86		membrane	metal ion binding			BRLA_c043980			0.832	0.647446
A0A2S5I3G5	Efflux RND transporter periplasmic adaptor subunit	6	2	44.8	7.94									0.832	0.822788
A0A385T662	Amino acid adenylation domain-containing protein	4	13	409.4	5.19									0.832	0.802554
A0A0F7C0P6	CoA-transferase	24	4	24.5	6.21	metabolic process		catalytic activity	Pf01144					0.831	0.647446
A0A075RCA3	Uncharacterized protein	17	1	5.9	7.25		membrane				BRLA_c027960			0.831	0.752074
A0A553KM53	Uncharacterized protein	3	1	28.8	4.94									0.83	0.814649
A0A518V5V4	Peptide ABC transporter substrate-binding protein	24	15	61.3	5.35									0.83	0.748979
A0A075R054	UPF0342 protein BRLA_c008980	46	4	13.1	4.88				Pf06133	34877666	BRLA_c008980	BRLA_RS04410		0.824	0.621864
A0A518V3I5	PDZ domain-containing protein	6	2	47.2	9.19									0.823	0.814649
A0A656ZSR5	Thiamine diphosphokinase	4	1	23.6	5.3									0.823	0.802609
polC	DNA polymerase III PolC-type	2	1	163.8	5.45									0.823	0.853115
rpoC	DNA-directed RNA polymerase subunit beta'	42	44	134.8	8.4									0.823	0.621145
pepF	Oligoendopeptidase F	3	2	69.1	5.3									0.821	0.845736
A0A0F7C002	NADH:ubiquinone oxidoreductase subunit L	5	2	69.7	8.62	metabolic process	membrane	catalytic activity	Pf00361, Pf01010					0.821	0.775417
A0A075R9C9	NRPS domain-containing protein	2	2	171.2	5.67	metabolic process		catalytic activity	Pf00501, Pf00550, Pf00668, Pf13193, Pf13745		BRLA_c018330			0.819	0.806369
A0A075R6E4	Macrolide export protein MacA	64	22	43.6	8.32	transport	membrane	transporter activity	Pf00529, Pf12700, Pf13437, Pf13533	34878962	BRLA_c039290	BRLA_RS18965		0.819	0.604903
A0A075R3T8	Uncharacterized protein	14	4	41	5.67				Pf15493	34876600	BRLA_c018290	BRLA_RS08935		0.819	0.814054
secE	Protein translocase subunit SecE	19	1	8.3	9.77									0.819	0.829593
A0A177XMU5	Succinyl-CoA--3-ketoacid-CoA transferase	21	3	25.3	5.99	metabolic process		catalytic activity	Pf01144		AYJ08_07370			0.818	0.594055
spoVG	Putative septation protein SpoVG	57	8	10.6	5.24									0.817	0.591339
cgtA	GTPase Obg	20	5	47	5.58									0.817	0.685491
prsA	Peptidylprolyl isomerase	73	25	38.7	7.39									0.817	0.588742
A0A2S5H694	Uncharacterized protein	19	7	37.6	5.2									0.815	0.581226
H0UEM6	Short chain dehydrogenase family protein	25	6	26.4	5.85				Pf00106		BLGI_3876			0.815	0.5794
A0A0F7EJX0	Sugar ABC transporter substrate-binding protein	6	2	34.8	5.62				Pf04392					0.815	0.766524
A0A2S5I498	Aminoacyl-histidine dipeptidase	2	1	54	5.17									0.814	0.808727
A0A385TCL4	Aminopeptidase	7	2	41.9	5.1									0.814	0.868644
A0A075RB71	3-hydroxyacyl-CoA dehydrogenase	19	12	88.4	6.27	metabolic process		catalytic activity	Pf00378, Pf00725, Pf02737	34878373	BRLA_c042030	BRLA_RS20275	Metabolic pathways; Microbial metabolism in diverse environments; Benzoate degradation; Carbon metabolism; Fatty acid degradation; Fatty acid metabolism; Butanoate metabolism	0.814	0.57005
H0U4I3	Putative lipoprotein	34	6	21.8	8.75						BLGI_248			0.813	0.567799
A0A177XJP9	Isocitrase	2	1	47.2	5.68	metabolic process		catalytic activity	Pf00463, Pf13714		AYJ08_17145			0.813	0.801074
pyrD	Dihydroorotate dehydrogenase (quinone)	4	1	40.1	8.32									0.812	0.831456
A0A075RG91	Uncharacterized protein	25	7	30.1	8.97				Pf07833, Pf14343	34876041	BRLA_c039620	BRLA_RS19130		0.812	0.554087
A0A0F7BZ21	Adenylosuccinate lyase	10	3	50.2	6.38	metabolic process		catalytic activity	Pf00206, Pf10397					0.812	0.814649
afsK	Serine/threonine-protein kinase AfsK	13	4	42.1	9.48									0.811	0.717126
A0A075R4P5	2-oxoglutarate oxidoreductase subunit KorA	45	21	64.3	5.47	metabolic process		catalytic activity	Pf01558, Pf01855, Pf02776	34877384	BRLA_c032100	BRLA_RS15485	Citrate cycle (TCA cycle); Microbial metabolism in diverse environments; Metabolic pathways; Biosynthesis of antibiotics; Glycolysis / Gluconeogenesis; Pyruvate metabolism; Butanoate metabolism; Carbon metabolism	0.808	0.533181
A0A2S5HQE5	Cytidine deaminase	18	2	14.2	4.97									0.807	0.726462
pyrH	Uridylate kinase	4	1	26.9	7.3									0.807	0.788099
pyc	Pyruvate carboxylase	26	24	127.6	5.72									0.807	0.864382
A0A0F6XZK8	Cell surface protein	62	102	121.4	5.58				Pf00395					0.806	0.524151
H0U8L5	Uncharacterized protein	7	2	43.8	5.27						BLGI_1727			0.805	0.748979
pdxS	Pyridoxal 5'-phosphate synthase subunit PdxS	40	11	31.7	5.74									0.805	0.520337
A0A075QYR6	Acetyl-CoA acetyltransferase	20	5	42.3	6.15	metabolic process		catalytic activity	Pf00108, Pf00109, Pf02803	34875016	BRLA_c011570	BRLA_RS05675	Biosynthesis of antibiotics; Fatty acid degradation; Terpenoid backbone biosynthesis; Valine, leucine and isoleucine degradation; Propanoate metabolism; Pyruvate metabolism; Fatty acid metabolism; Microbial metabolism in diverse environments; Biosynthesis of secondary metabolites; Synthesis and degradation of ketone bodies; Two-component system; Glyoxylate and dicarboxylate metabolism; Lysine deg…	0.804	0.64668
brvC	Brevibacillin synthetase C	8	27	526.1	5.1									0.804	0.788099
A0A0F7EII2	DUF5590 domain-containing protein	5	1	18.2	8.85				Pf03413					0.804	0.834658
A0A385TGL3	Peptidylprolyl isomerase	8	2	33.9	5.22									0.803	0.802609
A0A177XSF5	Cytochrome B oxidoreductase	22	5	23.2	7.12	metabolic process;transport	membrane	catalytic activity;transporter activity	Pf00510		AYJ08_02485			0.802	0.505408
fhs	Formate--tetrahydrofolate ligase	4	1	58.5	6.9									0.802	0.787837
A0A0F7EHV7	Enoyl-CoA hydratase	9	2	27.8	7.84	metabolic process		catalytic activity	Pf00378					0.801	0.591339
A0A0F6Y0I1	Beta-lysine acetyltransferase	17	3	31.5	5.78			catalytic activity	Pf00583, Pf13508, Pf13527, Pf13673					0.801	0.796384
A0A075RGD5	Long-chain-fatty-acid--CoA ligase	27	12	60.4	6.07	metabolic process		catalytic activity	Pf00501, Pf13193	34878115	BRLA_c040080	BRLA_RS19345		0.799	0.496171
A0A075QZ83	Macrolide export protein MacA	2	1	54.7	5.47	transport	membrane		Pf00364, Pf00529, Pf12700, Pf13437, Pf13533	34878781	BRLA_c005310	BRLA_RS02630		0.798	0.79948
A0A502INS3	Acyl-CoA dehydrogenase	26	14	65.6	5.36									0.798	0.492765
H0U413	3-hydroxypropionyl-coenzyme A dehydratase	21	4	27.8	5.49	metabolic process		catalytic activity	Pf00378		BLGI_78			0.796	0.485472
tycB	Non-ribosomal peptide synthase TIGR01720 domain protein	1	3	427.5	5.41									0.796	0.781364
A0A2S5HD77	UPF0637 protein C4A76_06390	4	1	24.4	6.96									0.793	0.814649
A0A0F7BZP3	Uncharacterized protein	10	1	15.8	4.73									0.793	0.677115
A0A517I2N6	NAD(P)/FAD-dependent oxidoreductase	3	1	48.5	7.24									0.792	0.801074
H0U4P5	Peptidase propeptide and YPEB domain protein	9	5	84.7	5.85				Pf00395		BLGI_311			0.79	0.771733
vpr	Minor extracellular protease vpr domain protein	48	45	119.8	5.25									0.79	0.45519
A0A2S5I2Z5	Nitroreductase family protein	16	3	23.1	5.41									0.788	0.443378
A0A177XTH9	Cytochrome c oxidase subunit 2	44	14	37.7	6.64	metabolic process;transport	membrane	catalytic activity;metal ion binding;transporter activity	Pf00034, Pf00116, Pf02790, Pf13442		AYJ08_02475			0.788	0.438769
A0A0F7BZY5	Acyl-CoA dehydrogenase	3	1	41.5	5.94	metabolic process		catalytic activity;nucleotide binding	Pf00441, Pf02770, Pf02771, Pf08028					0.786	0.760809
prmA	Ribosomal protein L11 methyltransferase	11	2	34.3	4.77									0.785	0.789134
A0A0F7EI56	Uncharacterized protein	1	1	79.5	5.39			protein binding	Pf00395					0.784	0.743234
A0A075RAS6	Coproheme III oxidative decarboxylase	26	5	29.2	6.04	metabolic process		antioxidant activity;catalytic activity	Pf06778	34875622	BRLA_c040460	BRLA_RS19530		0.783	0.805009
mfd	Transcription-repair-coupling factor	6	7	134.8	5.54									0.783	0.627931
A0A177XIA5	Crp/Fnr family transcriptional regulator	5	1	18.1	9.76		membrane				AYJ08_02120			0.782	0.719101
H0UBM9	Peptidase propeptide and YPEB domain protein	20	11	62.3	8						BLGI_2802			0.782	0.423213
A0A075R5H4	Putative_PNPOx domain-containing protein	43	5	17.1	5.3	metabolic process		catalytic activity;nucleotide binding	Pf01243	34878758	BRLA_c035300	BRLA_RS17070		0.781	0.422427
A0A075R913	Dihydrolipoamide acetyltransferase component of pyruvate dehydrogenase complex	35	11	47.9	6.57	metabolic process		catalytic activity	Pf00198, Pf00364, Pf02817	34877547	BRLA_c017260	BRLA_RS08440	Biosynthesis of antibiotics; Metabolic pathways; Valine, leucine and isoleucine degradation; Propanoate metabolism; Biosynthesis of secondary metabolites	0.78	0.417105
H0UE85	Copper amine oxidase N-terminal domain protein	45	22	76.3	9.14				Pf07833		BLGI_3729			0.78	0.417105
A0A075R6A7	Glyoxalase-like domain protein	10	1	14.4	4.86				Pf00903, Pf12681	34875451	BRLA_c030320	BRLA_RS14695		0.78	0.743234
A0A2S5I0H3	Antibiotic biosynthesis monooxygenase	8	1	12.4	7.15									0.779	0.64668
gcvPB	Probable glycine dehydrogenase (decarboxylating) subunit 2	16	7	53.7	5.54									0.778	0.685288
A0A075QXU1	2,3-diaminopropionate biosynthesis protein SbnA	22	6	35.7	6.16				Pf00291	34877546	BRLA_c008310	BRLA_RS04090	Biosynthesis of antibiotics; Biosynthesis of secondary metabolites; Sulfur metabolism; Cysteine and methionine metabolism; Carbon metabolism; Metabolic pathways; Biosynthesis of amino acids; Microbial metabolism in diverse environments	0.778	0.406726
A0A075R7N1	Flagellin	60	26	41.3	5.55	cellular component movement	extracellular	structural molecule activity	Pf00669, Pf00700	34877988	BRLA_c028740	BRLA_RS13985	Two-component system; Flagellar assembly	0.778	0.405201
A0A075R4Z1	Thiazole/oxazole-forming peptide maturase, SagD family component	2	1	46	5.15				Pf02624	34875392	BRLA_c025850	BRLA_RS22835		0.777	0.399723
topB	DNA topoisomerase 3	2	1	83	9.48									0.775	0.781364
flgG	Flagellar basal body protein	8	2	28.4	4.7									0.774	0.718559
A0A075R0M3	Putative lipoprotein	40	12	24.5	6.15				Pf05573	34877779	BRLA_c006380	BRLA_RS03155		0.773	0.386145
A0A0F7EE58	Cobalt-precorrin-4 C(11)-methyltransferase	7	1	29.9	6.35	metabolic process		catalytic activity	Pf00590					0.769	0.743234
J3AYM2	Alanine dehydrogenase	31	7	39.4	6.1	metabolic process		catalytic activity	Pf01262, Pf02882, Pf05222		PMI08_04302			0.768	0.801074
A0A2S5HK63	Histidine triad nucleotide-binding protein	33	5	12.7	6.71									0.768	0.363346
A0A177XQD3	Branched chain amino acid ABC transporter substrate-binding protein	12	6	42.5	6.57	transport			Pf01094, Pf13458		AYJ08_04345			0.768	0.363346
mtnX	2-hydroxy-3-keto-5-methylthiopentenyl-1-phosphate phosphatase	6	1	25.5	5.6									0.767	0.766524
A0A075RAP0	Membrane protein insertase YidC	12	3	28.9	9.6	transport	membrane		Pf02096	34878347	BRLA_c046610	BRLA_RS22540	Bacterial secretion system; Quorum sensing; Protein export	0.767	0.399723
A0A075R716	Alanine-anticapsin ligase BacD	25	7	51.2	5.24			catalytic activity;metal ion binding;nucleotide binding	Pf02655, Pf02786, Pf07478, Pf13535, Pf13549, Pf15632	34876034	BRLA_c010400	BRLA_RS05090		0.765	0.353763
ysdC	Putative aminopeptidase ysdC	9	2	39.5	5.39									0.765	0.654069
A0A2P7WAK8	ABC transporter substrate-binding protein	4	2	60.8	5.5									0.765	0.593253
menG	Demethylmenaquinone methyltransferase	5	1	28.6	8.6									0.761	0.760809
A0A075R1R9	Alanine dehydrogenase	31	9	38.3	6.74				Pf02423		BRLA_c008320		Arginine and proline metabolism; Biosynthesis of secondary metabolites; Biosynthesis of antibiotics; Biosynthesis of amino acids	0.76	0.3335
A0A177XSD6	Cytochrome c oxidase subunit 1	19	9	68.4	9.13	metabolic process;transport	membrane	catalytic activity;metal ion binding;transporter activity	Pf00115		AYJ08_02480			0.759	0.327521
A0A0F7EIU3	DUF218 domain-containing protein	3	1	39.6	9.13			protein binding	Pf02698					0.757	0.803107
A0A075RGQ6	Helix-turn-helix domain protein	8	3	52.9	5.54			DNA binding;protein binding	Pf01381, Pf12844, Pf13443, Pf13560	34876492	BRLA_c041350	BRLA_RS19955		0.754	0.621145
groEL	60 kDa chaperonin	66	35	57.6	5.01									0.753	0.308859
clpP	ATP-dependent Clp protease proteolytic subunit	26	4	21.8	5.66									0.752	0.647446
argE	Peptidase, ArgE/DapE family protein	42	14	47.6	4.86									0.751	0.303741
A0A502HV95	YxeA family protein	7	1	12.4	5.16									0.751	0.63636
phoH	PhoH-like family protein	20	4	36	5.99									0.749	0.467586
sodA2	Superoxide dismutase	49	8	23.5	5.9									0.749	0.294463
A0A075R389	Long-chain-fatty-acid--CoA ligase	9	3	62.1	5.16	metabolic process		catalytic activity	Pf00501, Pf13193	34879185	BRLA_c019880	BRLA_RS09715		0.749	0.618025
A0A0K2FLE6	Uncharacterized protein	6	1	29	5.03					26613775		AVT09_gp029		0.746	0.285334
hemC	Porphobilinogen deaminase	14	2	34.7	6.35									0.746	0.621145
A0A0F7EHL6	Peptidase	9	4	49.1	5.81			catalytic activity;metal ion binding	Pf05193					0.744	0.395693
A0A385T245	Phage tail tape measure protein	0	1	230.6	7.78									0.744	0.277919
pfkA	ATP-dependent 6-phosphofructokinase	10	1	34.4	5.82									0.744	0.796384
A0A0F6XZ37	Haloacid dehalogenase	7	1	25.1	5.29	metabolic process		catalytic activity	Pf00702, Pf12710, Pf13242, Pf13419					0.744	0.74378
A0A177XSK5	Uncharacterized protein	9	1	9.3	6.79						AYJ08_00010			0.742	0.437279
A0A6M1U5Q6	Acyl-CoA desaturase	5	1	40.7	9.88									0.742	0.613171
A0A3M8DTA4	Pyridoxal-phosphate dependent enzyme	9	1	34.2	6.1									0.74	0.659083
A0A177XH43	Spore gernimation protein	13	2	19	5.92				Pf10646		AYJ08_17685			0.739	0.588209
purF	Amidophosphoribosyltransferase	1	1	51.9	6.54									0.738	0.252383
groL	60 kDa chaperonin	52	31	57.6	4.98									0.737	0.245625
A0A502IS90	TPR_REGION domain-containing protein	10	3	36.7	4.83									0.735	0.437279
metG	Methionine--tRNA ligase	27	14	77.3	5.87									0.734	0.717126
H0U9K2	Uncharacterized protein	35	1	5.4	8.24		membrane		Pf07095		BLGI_2002			0.733	0.550188
A0A385TDQ2	Recombinase	2	1	33.1	8.22									0.733	0.514418
yngG	Hydroxymethylglutaryl-CoA lyase YngG	18	4	31.8	6.06									0.733	0.437279
A0A177XQ95	Acyl--CoA ligase	9	4	59.7	5.71	metabolic process		catalytic activity	Pf00501, Pf13193		AYJ08_04310			0.732	0.301591
A0A0F7EIY7	VOC domain-containing protein	12	1	14	5.1				Pf00903, Pf12681					0.732	0.659083
H0U7N4	Helix-turn-helix family protein	5	2	48.8	6.05			DNA binding;protein binding	Pf01381, Pf12844, Pf13443, Pf13560		BLGI_1392			0.731	0.569902
A0A075R3F2	Oligoendopeptidase, M3 family protein	12	6	67.4	5.57	metabolic process		catalytic activity;metal ion binding	Pf01432	34878047	BRLA_c027430	BRLA_RS13345		0.727	0.217638
H0UAR8	Outer membrane efflux family protein	48	19	42.1	6.67	transport		transporter activity	Pf02321		BLGI_2488			0.727	0.217167
acsA	AMP-binding enzyme family protein	14	7	64.7	5.96									0.727	0.216699
A0A075R4X0	GAF domain-containing protein	6	1	17.8	4.7			protein binding	Pf01590, Pf13185, Pf13492	34878859	BRLA_c022000	BRLA_RS10725		0.723	0.205482
A0A6M1UGG1	Carbon-nitrogen family hydrolase	13	2	30.2	5.54									0.722	0.332521
A0A0F6XZW9	PDZ domain-containing protein	4	1	39.9	8.94	metabolic process	membrane	catalytic activity;nucleotide binding;protein binding	Pf00595, Pf05362, Pf13180					0.719	0.659083
A0A075R103	Helix-turn-helix domain protein	10	4	53.9	5.62			DNA binding;protein binding	Pf01381, Pf13443, Pf13560, Pf13744	34878895	BRLA_c007980	BRLA_RS03935		0.719	0.47817
A0A3E0RP77	LacI family transcriptional regulator	3	1	36.4	7.94									0.718	0.193753
tycC	Tyrocidine synthase 3	9	3	48.5	6.28									0.714	0.285334
A0A0F7EF42	Uncharacterized protein	7	2	38.9	8.41				Pf11258					0.713	0.35581
A0A075R8F4	Methionine synthase	1	1	127.4	5.12	metabolic process		catalytic activity;metal ion binding	Pf00809, Pf02310, Pf02574, Pf02607, Pf02965	34877020	BRLA_c015020	BRLA_RS07355	Biosynthesis of secondary metabolites; Cysteine and methionine metabolism; One carbon pool by folate; Metabolic pathways; Biosynthesis of amino acids; Selenocompound metabolism	0.712	0.74378
hfq	RNA-binding protein Hfq	18	1	9.2	9.19									0.71	0.496171
A0A3M8DSX3	Thiolase family protein	2	1	41.2	6.46									0.71	0.284063
A0A0F6XYM0	Siroheme decarboxylase	43	13	40.1	5.55	regulation of biological process		DNA binding	Pf13404					0.708	0.177328
argG	Argininosuccinate synthase	18	6	47.1	5.29									0.708	0.262734
A0A075R5H3	Uncharacterized protein	6	1	45.4	6.58						BRLA_c027750			0.707	0.659083
A0A075RBZ0	Succinate dehydrogenase/fumarate reductase iron-sulfur subunit	6	4	78.7	6.19		membrane		Pf02754, Pf12797, Pf13183, Pf13237	34878059	BRLA_c044740	BRLA_RS21620		0.702	0.437279
A0A2S5HW37	Uncharacterized protein	7	1	34.8	6.4									0.7	0.414704
J2H865	Chemotaxis signal transduction protein	5	1	18.1	4.75	regulation of biological process;response to stimulus		signal transducer activity	Pf01584		PMI05_00589			0.698	0.398967
A0A075QWH4	Nitronate monooxygenase	11	3	39.4	5.72	metabolic process	cytoplasm	catalytic activity	Pf00478, Pf01070, Pf01180, Pf01645, Pf03060	34878146	BRLA_c003810	BRLA_RS01890	Nitrogen metabolism	0.697	0.437279
nuoN	NADH-quinone oxidoreductase subunit N	2	1	55.7	8.62									0.697	0.51409
A0A3M8DWY8	HU family DNA-binding protein	67	7	9.8	8.37									0.696	0.500997
A0A0F7BYQ9	Uncharacterized protein	7	2	40.4	5.3									0.694	0.27166
appA	Bacterial extracellular solute-binding s, 5 Middle family protein	21	10	65.8	6.35									0.691	0.118566
A0A502IR83	XRE family transcriptional regulator	2	1	50.3	6.15									0.69	0.508721
A0A177XKN0	Ornithine cyclodeaminase	4	1	35.4	6.32				Pf01488, Pf02423		AYJ08_15185			0.689	0.395045
A0A3E0R784	Nucleotide pyrophosphohydrolase	24	2	13.3	4.96									0.688	0.54979
rplI	50S ribosomal protein L9	5	1	16.4	9.42									0.687	0.116475
H0UC20	Receptor ligand binding region family protein	14	4	41.4	6.95	transport			Pf01094, Pf13433, Pf13458		BLGI_2943			0.686	0.197978
A0A0F7BYE2	Neutral metalloproteinase	16	7	62.1	5.48	metabolic process		catalytic activity	Pf01447, Pf02868, Pf03413, Pf07504					0.685	0.112871
A0A075R8G5	Thermophilic serine proteinase	30	7	42.6	5.3	metabolic process		catalytic activity	Pf00082	34875486	BRLA_c033740	BRLA_RS16295		0.683	0.108023
ribB	Riboflavin biosynthesis protein RibBA	15	5	44.7	6.48									0.68	0.620998
A0A177XLL9	Peptide ABC transporter substrate-binding protein	22	9	61	6.77	transport			Pf00496		AYJ08_13170			0.676	0.0917932
A0A3M8CIM7	Peptide ABC transporter substrate-binding protein	5	4	61.4	5.17									0.673	0.308249
A0A177XSP0	Aldehyde dehydrogenase	39	10	50.8	5.81	metabolic process		catalytic activity	Pf00171		AYJ08_02455			0.673	0.0845225
J3ADX4	Uncharacterized protein	8	1	10.5	6.76						PMI05_01384			0.673	0.0845225
A0A502IJE8	OsmC family peroxiredoxin	31	3	16.4	5.35									0.671	0.166414
H0U5H3	Beta-lactamase family protein	4	2	59.7	4.86				Pf00144		BLGI_603			0.671	0.231621
A0A3M8DQ37	Isocitrate dehydrogenase [NADP]	17	5	46.6	5.25									0.669	0.0788383
A0A3M8CV02	ABC transporter substrate-binding protein	2	1	59.7	5.5									0.669	0.172801
spoIIAB	Anti-sigma F factor	14	1	16.2	4.65									0.667	0.33746
A0A518V7P9	Sirohydrochlorin chelatase	4	1	39.7	6.27									0.665	0.374996
A0A0K9YTM0	4-aminobutyrate aminotransferase	2	1	48.2	5.78	metabolic process		catalytic activity	Pf00155, Pf00202		ADS79_22515			0.665	0.11565
A0A0K9YUD2	Endotoxin_N domain-containing protein	2	1	48.6	6.62	cell differentiation			Pf03945		ADS79_10350			0.664	0.141885
A0A177XH02	Lipoprotein	19	4	30.6	5.58				Pf03180		AYJ08_17645			0.662	0.317327
A0A502IZQ6	Uncharacterized protein	7	1	21.7	8.7									0.659	0.416768
A0A3M8BE46	Thiamine diphosphokinase	4	1	23.7	5.59									0.659	0.0616577
A0A0F6XYQ5	Oligoendopeptidase	38	15	68.5	5.11	metabolic process		catalytic activity;metal ion binding	Pf01432, Pf08439					0.659	0.423608
A0A385T696	NAD-dependent epimerase/dehydratase family protein	12	3	34.2	4.88									0.657	0.35581
A0A518V2H1	Fatty-acid--CoA ligase	9	4	60.3	5.54									0.657	0.250689
A0A075R7X7	Uncharacterized protein	16	6	54.9	7.37			protein binding		34877279	BRLA_c036620	BRLA_RS17690		0.657	0.0586457
yusY	Oligoendopeptidase, pepF/M3 family protein	42	17	68.4	5.14									0.656	0.058536
A0A075R618	2,4-dienoyl-CoA reductase	4	2	74.3	7.47	metabolic process		catalytic activity;nucleotide binding	Pf00070, Pf00724, Pf00890, Pf01207, Pf01210, Pf01266, Pf01494, Pf01946, Pf02737, Pf03486, Pf07992, Pf13450, Pf13738		BRLA_c038020			0.656	0.283923
A0A0F7BY79	4-aminobutyrate aminotransferase	30	10	49.4	6.2	metabolic process		catalytic activity	Pf00155, Pf00202					0.653	0.507185
yhcR	OB-fold nucleic acid binding domain protein	5	6	166.6	5.41									0.651	0.537003
A0A0F6XYQ3	Cytochrome C oxidase subunit IV	39	2	11.6	9.39		membrane		Pf03626					0.65	0.327521
A0A3M8APJ5	3-hydroxyacyl-CoA dehydrogenase	5	2	88	7.65									0.648	0.496171
tycB	Tyrocidine synthetase II	2	5	407.7	5.35									0.647	0.551601
H0U9H7	Uncharacterized protein	10	2	23.1	9.69						BLGI_2215			0.646	0.121944
spoVG	Putative septation protein SpoVG	57	8	10.7	5.24									0.645	0.0445844
A0A6M1U6B3	Purine nucleoside phosphorylase	7	2	29.4	5.81									0.645	0.122085
metY	O-acetylhomoserine aminocarboxypropyltransferase/cysteine synthase family protein	8	2	46.5	5.59									0.644	0.26624
A0A0F7EHB2	AsnC family transcriptional regulator	22	2	19	6.23	regulation of biological process		DNA binding	Pf01037, Pf13404, Pf13412					0.643	0.359655
A0A518V401	ATP-binding cassette domain-containing protein	4	1	65.4	7.62									0.642	0.48456
H0UEA1	Triacylglycerol lipase	7	3	46.5	5.57			catalytic activity	Pf07819		BLGI_3745			0.64	0.217508
C0ZIF0	CDP-diacylglycerol--serine O-phosphatidyltransferase	4	1	26.7	9.7	metabolic process	membrane	catalytic activity	Pf01066	29257504	BBR47_01910	BBR47_01910; BBR47_RS01195	Glycine, serine and threonine metabolism; Glycerophospholipid metabolism; Biosynthesis of secondary metabolites; Metabolic pathways	0.637	0.245625
spoVS	Stage V sporulation protein S	71	4	8.8	6.62									0.634	0.0342496
A0A075R136	Phosphoribosylglycinamide formyltransferase	11	3	33.5	6.98	metabolic process		catalytic activity	Pf00551	34878045	BRLA_c008300	BRLA_RS04085	Biosynthesis of antibiotics; Biosynthesis of secondary metabolites; Purine metabolism; Metabolic pathways; One carbon pool by folate	0.631	0.0317999
A0A177XPG1	Lipid kinase	4	1	32.5	8.35	metabolic process		catalytic activity	Pf00781		AYJ08_06135			0.629	0.397127
metE	5-methyltetrahydropteroyltriglutamate--homocysteine methyltransferase	1	1	86.8	6.25									0.628	0.101841
A0A0F7C1S5	Phenylalanine 4-monooxygenase	12	7	65.9	5.01	metabolic process		catalytic activity;metal ion binding	Pf00351					0.626	0.139284
A0A075R511	ABC-type Fe3+-hydroxamate transport system, periplasmic binding protein	4	1	37.8	6.2				Pf01497	34875515	BRLA_c026100	BRLA_RS12660	ABC transporters	0.624	0.418336
gabT	4-aminobutyrate transaminase	32	11	49.4	5.95									0.623	0.0253611
A0A075R1Q3	Carboxy-terminal processing protease CtpB	2	1	57.4	5.88	metabolic process		catalytic activity;protein binding	Pf00595, Pf03572, Pf13180	34874951	BRLA_c014350	BRLA_RS07030		0.623	0.228596
H0U8R3	S-layer homology domain protein	3	1	46.9	8.9				Pf00395		BLGI_1781			0.621	0.346351
A0A0F6Y0L0	Uncharacterized protein	14	2	21.9	5.24									0.619	0.13949
A0A2S5H0T3	Uncharacterized protein	4	1	22.7	5.73									0.618	0.0220019
A0A3M8DTM4	Peptidase	1	1	111.3	4.93									0.612	0.0194742
A0A075RH62	Metal-dependent hydrolase	11	1	18.2	5.71			catalytic activity	Pf12867	34878722	BRLA_c042700	BRLA_RS20600		0.612	0.285914
A0A3M8DN75	Glyceraldehyde-3-phosphate dehydrogenase	4	1	37.9	6.84									0.611	0.126914
A0A177XS47	Uncharacterized protein	41	3	12.7	6.65						AYJ08_21830			0.602	0.116534
A0A0F7EGF5	Peptidase	13	9	62.4	7.12									0.596	0.0166606
H0U6Q2	Bacterial pre-peptidase C-terminal domain protein	13	5	50.8	5.19						BLGI_1042			0.595	0.0356568
yybT	Cyclic-di-AMP phosphodiesterase	6	2	72.3	5.99									0.594	0.162996
spo0A	Stage 0 sporulation protein A homolog	37	8	29	7.55									0.592	0.0104867
A0A2S5HMY2	YggT family protein	23	2	10.3	8.56									0.591	0.0370633
A0A075R6C1	Putative multidrug export ATP-binding/permease protein	2	1	67.1	6.99	transport	membrane	catalytic activity;nucleotide binding;transporter activity	Pf00005, Pf00664, Pf02463, Pf03193, Pf13207	34877097	BRLA_c023730	BRLA_RS11520	ABC transporters	0.589	0.158891
groS	10 kDa chaperonin	61	7	10.1	5.07									0.586	0.0087561
A0A502IFJ5	Precorrin-8X methylmutase	33	4	23.9	5.82									0.584	0.0295937
A0A502IRP3	Cytochrome C oxidase Cbb3	42	6	28	6.79									0.584	0.352446
A0A2S5HK69	Amidohydrolase	5	1	44.3	5.85									0.58	0.296865
A0A502HUM7	Neutral metalloproteinase	2	1	61.7	5.17									0.578	0.0738368
A0A177XT72	Copper amine oxidase	40	22	74.8	8.95				Pf07833		AYJ08_20375			0.575	0.285334
ltrA1	Group II intron-encoded protein ltrA	1	1	70.7	9.66									0.573	0.124423
A0A177XIW0	L-serine deaminase	4	1	24.1	5.85	metabolic process		catalytic activity	Pf01842, Pf03315		AYJ08_15080			0.565	0.071919
A0A656ZTS2	Uncharacterized protein	5	1	24.7	5.97									0.561	0.05983
A0A177XUL1	Peptide ABC transporter permease (Fragment)	4	1	32.4	8.53	transport	membrane		Pf00528		AYJ08_00070			0.56	0.104402
A0A075QWP0	Putative YkwD family protein	4	1	47.7	9.2				Pf00188, Pf14504	34878719	BRLA_c004460	BRLA_RS02205		0.558	0.133277
A0A075QZP1	Uncharacterized protein	15	4	37.7	5.31					34878348	BRLA_c002910	BRLA_RS01460		0.552	0.011991
H0UCK1	Acetamidase/Formamidase family protein	6	1	33.8	5.39	regulation of biological process;response to stimulus		catalytic activity	Pf00610, Pf03069		BLGI_3137			0.545	0.180089
rplF	50S ribosomal protein L6	24	4	19.3	10.04									0.545	0.0813448
groL	60 kDa chaperonin	63	34	57.5	4.98									0.544	0.0053522
A0A0F6Y0H8	Uncharacterized protein	10	1	9.4	6.29									0.538	0.0586457
gabD	Aldehyde dehydrogenase family protein	39	10	50.8	5.81									0.538	0.223391
ileS	Isoleucine--tRNA ligase	15	11	105.8	5.47									0.536	0.172462
A0A385TA71	Chitinase	8	6	93.6	6.35									0.535	0.0417965
cpn60	60 kDa chaperonin (Fragment)	61	8	19.5	5.24									0.533	0.0284104
A0A0F7EEQ2	Uncharacterized protein	5	1	29.4	5.1									0.532	0.0405396
endo	Chitodextrinase	18	11	94.4	6.06									0.531	0.00100035
A0A2S5HLU8	Putative PTS system EIIA component	2	1	82.5	6.51									0.53	0.0596276
argS	Arginine--tRNA ligase	3	1	63.9	5.29									0.527	0.160315
A0A385TFP1	Uncharacterized protein	6	1	24.8	7.68									0.524	0.01889
A0A075R7R1	RapGH repressor	5	1	47.3	7.03			DNA binding;protein binding	Pf01381, Pf12844, Pf13443, Pf13560	34876418	BRLA_c036070	BRLA_RS17440		0.522	0.196886
H0U7Y4	Putative membrane protein	13	1	7.3	7.18		membrane				BLGI_1494			0.519	0.028785
A0A2S5HPU4	Pyridine nucleotide-disulfide oxidoreductase	2	1	45	9.04									0.515	0.136338
sdhC	Succinate dehydrogenase cytochrome b558 subunit SdhC	35	5	23.2	9.54									0.511	0.000375598
tuf	Elongation factor Tu	33	8	43.4	5.19									0.51	0.000365201
H0U4B4	Major Facilitator Superfamily protein	10	4	46.6	9.39	transport	membrane		Pf03209, Pf05977, Pf07690		BLGI_179			0.508	0.0129405
M8E747	Biotin/lipoate A/B protein ligase	3	1	29.6	7.08	metabolic process		catalytic activity	Pf03099		I532_18732			0.508	0.0227628
spoIIAB	Anti-sigma F factor	29	2	16.2	4.55									0.507	0.0124776
A0A075QZZ5	Uncharacterized protein	11	6	58	5.15					34875297	BRLA_c001030	BRLA_RS00520		0.5	0.000215266
A0A0F7BZ41	Transporter	13	4	43.9	8.63	transport	membrane	transporter activity	Pf00529, Pf02321, Pf12700, Pf13437, Pf13533					0.497	0.00214135
atoD	Acetate CoA-transferase subunit alpha	23	3	22.2	4.82									0.491	0.00936552
A0A502H8K0	Acetyl-CoA C-acetyltransferase	2	1	41.5	5.92									0.488	0.0129216
A0A291BN02	Phage shock protein A	30	9	25.2	5.68									0.464	0.00610621
A0A2S5HQ17	Sporulation protein	6	1	31.5	9.29									0.463	0.0211228
H0U8X5	YlxR domain-containing protein	25	2	11.2	9.47				Pf04296		BLGI_1843			0.462	0.000392213
V6MC72	Purine nucleoside phosphorylase	14	3	28.9	5.43	metabolic process		catalytic activity	Pf01048		T458_02115			0.461	0.00583937
A0A2S5I0E4	Formate dehydrogenase subunit alpha	1	1	110.3	5.6									0.457	0.00514174
A0A0F6Y0T4	3-oxoacyl-ACP synthase	5	1	27	7.37	metabolic process		catalytic activity	Pf00106, Pf01073, Pf01370, Pf03435, Pf08659, Pf13561					0.456	0.01889
A0A075QZL3	Cytochrome P450	7	2	46.7	6.14	metabolic process		catalytic activity;metal ion binding	Pf00067	34877700	BRLA_c006760	BRLA_RS03350		0.439	0.0206089
C0Z5K9	Probable ABC transporter substrate binding protein	1	1	60.6	5.92	transport			Pf00496	29262368	BBR47_51380	BBR47_51380; BBR47_RS25715	Quorum sensing	0.438	4.55248e-06
A0A518VEW9	Integrase	5	2	77.3	6.1									0.437	0.0439228
A0A177XLB4	Uncharacterized protein	7	1	39.2	9.41		membrane		Pf01594		AYJ08_10640			0.433	0.0370439
A0A542SG82	Peptide/nickel transport system ATP-binding protein	2	1	35.3	7.44									0.424	1.70004e-06
map	Methionine aminopeptidase	8	1	27.6	5.73									0.422	0.0245205
A0A075RB38	Uncharacterized protein	22	3	24.5	5.53					34876651	BRLA_c024200	BRLA_RS11750		0.419	0.0205098
M8EB65	UPF0297 protein I532_08122	25	1	10.1	6.09				Pf06135		I532_08122			0.414	0.0251391
A0A385TAT5	Uncharacterized protein	8	1	21.2	5.26									0.412	0.0054425
A0A502I9E3	Uncharacterized protein	8	1	21.2	5.43									0.412	0.0054425
H0UFX5	Aldehyde dehydrogenase family protein	3	1	45	5.58	metabolic process		catalytic activity	Pf00171		BLGI_4338			0.407	0.00107642
atpG	ATP synthase gamma chain	46	12	32.1	9.13									0.404	0.00246899
H0UFX6	tRNA synthetase class II core domain family protein	2	1	43.4	6.06	metabolic process		catalytic activity;nucleotide binding	Pf00587		BLGI_4339			0.401	0.000562818
atpB	ATP synthase subunit a	17	2	31.1	7.8									0.396	0.020814
A0A0Q3WPV7	Multidrug ABC transporter ATP-binding protein	1	1	66.1	5.78	transport	membrane	catalytic activity;nucleotide binding;transporter activity	Pf00005, Pf00664, Pf02463, Pf03193, Pf13207		AN963_06805			0.395	1.58721e-07
A0A656ZQ41	PKS_PP domain-containing protein	1	1	100.5	6									0.369	1.41818e-08
A0A075QX35	NlpC/p60-like transpeptidase	8	2	38.1	5.47					34877325	BRLA_c006040	BRLA_RS02990		0.365	4.79655e-05
rpmC	50S ribosomal protein L29	65	4	7.5	9.98									0.353	0.000442875
A0A3E0RKM9	Recombinase family protein	2	1	57.6	9.29									0.349	3.12294e-06
psd	Phosphatidylserine decarboxylase proenzyme	15	3	31.7	9.55									0.345	1.49711e-05
sigF	RNA polymerase sigma factor	33	7	28.6	5.34									0.33	1.78224e-10
yodB	HTH-type transcriptional regulator YodB	16	1	12	7.28									0.322	0.00143478
A0A4Y3PIQ4	DNA helicase	1	1	125.8	6.64									0.316	2.82705e-10
A0A177XKE2	Oxidoreductase	17	1	13.9	7.24		membrane		Pf07681		AYJ08_11800			0.315	0.00119658
A0A0F6Y0R3	Membrane protein	28	2	13.2	9.72		membrane		Pf04241	34874864		BRLA_RS12355		0.305	2.13811e-07
A0A385T9I6	Uncharacterized protein	4	1	27.8	9.32									0.301	4.85745e-05
A0A6M1U537	Histidine kinase	2	1	56.4	6.65									0.3	2.32051e-07
A0A2S5HS06	6-phospho-beta-glucosidase	5	1	49.5	6.04									0.286	0.000152033
H0UGU6	Uncharacterized domain protein	9	2	26.9	5.49				Pf12847, Pf13578		BLGI_4659			0.278	1.05639e-07
A0A177XM21	Energy-coupled thiamine transporter ThiT	30	2	20.1	9.83	transport	membrane	transporter activity	Pf09515		AYJ08_09740			0.27	0.000116748
H0U743	Glycosyl hydrolases 18 family protein	27	16	72.1	6.81	metabolic process		catalytic activity	Pf00553, Pf00704, Pf09478		BLGI_1197			0.265	9.83227e-15
A0A177XSE6	DNA-binding protein	2	1	48.9	5.9			DNA binding;protein binding	Pf01381, Pf12844, Pf13443, Pf13560		AYJ08_02580			0.249	1.49711e-05
A0A075R114	Uncharacterized protein	2	1	56.2	6.3		membrane		Pf08006	34876391	BRLA_c012390	BRLA_RS06090		0.23	7.91266e-08
gerM	Spore germination protein GerM	44	11	38.2	5.67									0.2	4.46807e-16
A0A220MFC5	Uncharacterized protein	21	1	11.7	5.06									0.193	7.61574e-14
ysdC	Putative aminopeptidase ysdC	23	7	38.9	6.33									0.192	1.09644e-07
A0A553KTY3	Cytochrome b6	31	6	25.1	7.3									0.18	8.16124e-08
cysK	Cysteine synthase	23	4	32.9	5.05									0.166	2.39883e-10
acoD	Acetaldehyde dehydrogenase 2	37	15	55.3	5.72									0.155	4.46807e-16
A0A0F7C0F1	Precorrin-3B C17-methyltransferase	27	7	29.1	6.73	metabolic process		catalytic activity						0.142	4.46807e-16
spoIVA	Stage IV sporulation protein A	24	11	55.3	5.02									0.138	4.46807e-16
A0A0F7EE93	Uncharacterized protein	5	1	26	6.95									0.125	4.46807e-16
pckA	Phosphoenolpyruvate carboxykinase (ATP)	7	3	57.6	5.29									0.119	4.81551e-14
codY	GTP-sensing transcriptional pleiotropic repressor CodY	58	13	28.5	6.81									0.105	4.46807e-16
A0A177XHG5	DUF4367 domain-containing protein	22	5	38.8	6.19				Pf14285		AYJ08_17710			0.101	4.46807e-16
spoIIQ	Stage II sporulation protein Q	29	7	26.5	6.55									0.087	4.46807e-16
H0UDT5	Stage III sporulation protein AH	51	9	25	5.76		membrane		Pf12685		BLGI_3579			0.083	4.46807e-16
A0A075R2U9	Stage IV sporulation protein A	45	19	55.3	4.91	cell differentiation	cytoplasm	catalytic activity;nucleotide binding	Pf09547		BRLA_c018870			0.077	4.46807e-16
spoVID	Stage VI sporulation protein D	15	9	143.1	4.69									0.062	4.46807e-16
A0A177XQY3	Stage IV sporulation protein A	43	18	55.2	4.91	cell differentiation	cytoplasm	catalytic activity;nucleotide binding	Pf09547		AYJ08_05680			0.06	4.46807e-16
H0UHG2	LysM domain protein	19	3	25.9	4.96				Pf01476		BLGI_4886			0.046	4.46807e-16
A0A6M1UAG2	Lipoprotein	8	1	31	5.54									0.01	4.46807e-16
H0U7F0	SCP-2 sterol transfer family protein	12	1	11.6	6.6				Pf02036, Pf14864		BLGI_1308			0.01	4.46807e-16
J2IDV8	Flagellin	15	2	29.1	9.6	cellular component movement	extracellular	structural molecule activity	Pf00669, Pf00700		PMI08_00909			0.01	4.46807e-16
A0A177XQ46	Uncharacterized protein	11	1	11.6	6.79						AYJ08_08070			0.01	4.46807e-16
A0A6M1U313	3-hydroxyacyl-CoA dehydrogenase	5	2	88.2	7.17									0.01	4.46807e-16
H0U5P1	Uncharacterized domain protein	16	1	15.2	4.82						BLGI_671			0.01	4.46807e-16
ywnA	Putative HTH-type transcriptional regulator ywnA	17	1	15.1	6.29									0.01	4.46807e-16
A0A2S5HZ06	Stage V sporulation protein D	1	1	70.5	9.2									0.01	4.46807e-16
nrdR	Transcriptional repressor NrdR	10	1	19.3	7.69									0.01	4.46807e-16
A0A518VBI7	Uncharacterized protein	6	1	20.4	5.82									0.01	4.46807e-16
kbaY	Tagatose-bisphosphate aldolase	51	14	30.8	5.4									0.01	4.46807e-16
A0A075R420	Divalent metal cation transporter MntH	4	1	48.7	9.35	transport	membrane	metal ion binding;transporter activity	Pf01566	34876542	BRLA_c029500	BRLA_RS14320		0.01	4.46807e-16
A0A3M8D3K3	ABC transporter permease	7	1	32	9.31									0.01	4.46807e-16
A0A075QYZ1	Spore coat protein	3	1	38.4	9.44					34876750	BRLA_c012320	BRLA_RS06050		0.01	4.46807e-16
A0A177XMP1	Chitinase	24	15	72.2	7.12	metabolic process		catalytic activity	Pf00553, Pf00704, Pf09478		AYJ08_08620			0.01	4.46807e-16
A0A075R4S2	Germination-specific N-acetylmuramoyl-L-alanine amidase	4	1	26.8	8.07	metabolic process		catalytic activity	Pf01520	34875979	BRLA_c002150	BRLA_RS01085	Cationic antimicrobial peptide (CAMP) resistance	0.01	4.46807e-16
A0A220MGQ7	Dihydrolipoyl dehydrogenase	3	1	50	5.62	cellular homeostasis;metabolic process;regulation of biological process		catalytic activity;nucleotide binding	Pf00070, Pf00890, Pf01134, Pf02852, Pf03721, Pf07992, Pf12831, Pf13434					0.01	4.46807e-16
A0A0K9YW50	RNA polymerase sigma factor	6	1	27.8	6.34	metabolic process;regulation of biological process		DNA binding	Pf04542, Pf04545		ADS79_11450			0.01	4.46807e-16
A0A502IVF3	Amino acid adenylation domain-containing protein	8	16	295.7	5.01									0.01	4.46807e-16
M8DJR2	Oligopeptide ABC transporter substrate-binding protein	5	2	61.8	5.27	transport			Pf00496		I532_06700			0.01	4.46807e-16
V6MFL4	Transposase	1	1	101.3	8.28	metabolic process		catalytic activity	Pf01526		T458_12420			0.01	4.46807e-16
A0A385T5C8	Cytochrome c biogenesis protein ResB	4	1	63.5	7.99									0.01	4.46807e-16
pfkA	ATP-dependent 6-phosphofructokinase	10	1	34.3	5.69
A0A502IAN0	Amino acid adenylation domain-containing protein	8	32	523.2	5.26
M8DTR5	Aldehyde dehydrogenase	4	1	55.4	5.3	metabolic process		catalytic activity	Pf00171, Pf05893		I532_22547
A0A385TK46	Amino acid adenylation domain-containing protein	10	35	520.3	5.19
ribH	6,7-dimethyl-8-ribityllumazine synthase	33	3	16.8	6.3
A0A518VFG1	Amino acid adenylation domain-containing protein	10	34	520.4	5.21
A0A177XHC5	Alkyl hydroperoxide reductase	18	1	16.7	5.14	metabolic process		antioxidant activity;catalytic activity			AYJ08_17900
A0A2S5HV62	Non-ribosomal peptide synthetase	9	33	520.8	5.17
A0A502H7N5	3-ketoacyl-ACP reductase	26	4	25.3	5.26
A0A2S5HB09	2-oxoacid:acceptor oxidoreductase subunit alpha	42	19	64.2	5.34
A0A502IS36	ABC transporter ATP-binding protein	32	8	36.5	6.73
rplL	50S ribosomal protein L7/L12	72	7	12.4	4.7
A0A0F7EJ78	Bacitracin synthetase	5	40	1384.5	5.07	metabolic process		catalytic activity	Pf00501, Pf00550, Pf00668, Pf13193, Pf13745
A0A177XS18	Carbonic anhydrase	8	1	21	6.8			catalytic activity;metal ion binding	Pf00484		AYJ08_04110
gcvPB	Probable glycine dehydrogenase (decarboxylating) subunit 2	15	8	54.1	5.87
A0A177XI25	Aminopyrimidine aminohydrolase	34	7	26.5	5.99	metabolic process		catalytic activity	Pf03070		AYJ08_16320
gatB	Aspartyl/glutamyl-tRNA(Asn/Gln) amidotransferase subunit B	4	2	53.4	5.64
atpE	ATP synthase subunit c	40	1	7.4	6.52
deoD	Purine nucleoside phosphorylase DeoD-type	14	2	25.8	5.3
A0A0F7C044	Thiamine biosynthesis protein ThiF	4	1	38	6.29			catalytic activity	Pf00899, Pf05237
A0A177XRJ1	Polymerase	25	9	50.7	6.89	cell organization and biogenesis			Pf03775, Pf03961, Pf04519		AYJ08_04470
thyA	Thymidylate synthase	10	1	30.2	5.99
A0A2S5HRX3	Nickel ABC transporter substrate-binding protein	2	1	58.4	5.17
gcvT	Aminomethyltransferase	11	3	40.1	5.4
alaC	Aminotransferase	18	4	43.5	5.17
aspS	Aspartate--tRNA ligase	17	9	68	5.25
A0A3M8D599	Chromosome segregation protein SMC	2	1	125.8	6.01
A0A0F7EG46	Stage II sporulation protein E	2	1	91.6	6.18		membrane	catalytic activity	Pf07228, Pf13672
panB	3-methyl-2-oxobutanoate hydroxymethyltransferase	7	1	31.1	6.11
pgk	Phosphoglycerate kinase	4	1	41.8	5.52
pyk	Pyruvate kinase	34	14	62.1	5.63
rplF	50S ribosomal protein L6	45	6	19.3	10.08
A0A385T448	Superoxide dismutase	26	4	23.5	5.69
A0A075R3U3	Cyclic peptide transporter	2	1	116.7	7.61	transport	membrane	catalytic activity;nucleotide binding;transporter activity	Pf00005, Pf00144, Pf00664, Pf13207, Pf13304		BRLA_c018340
A0A3M8B698	Amino acid adenylation domain-containing protein	1	2	405.5	5.35
accC	Biotin carboxylase	13	4	49.5	5.15
A0A518VEF5	Amidohydrolase	4	1	43.8	5.63
A0A2P7X6G3	BMP family ABC transporter substrate-binding protein	5	1	37	5.85
atpA	ATP synthase subunit alpha	23	10	54.4	6.18
yvdD	Cytokinin riboside 5'-monophosphate phosphoribohydrolase	18	3	20.6	6.28
aroB	3-dehydroquinate synthase	7	1	40.3	5.43
fusA	Elongation factor G	10	6	76.6	5.17
A0A385T8B0	2',3'-cyclic-nucleotide 2'-phosphodiesterase/3'-nucleotidase	19	12	94	5.26
rnr	Ribonuclease R	2	1	95.1	7.15
atpD	ATP synthase subunit beta	45	15	50.9	5.1
A0A502IG93	Spermidine/putrescine ABC transporter substrate-binding protein	23	6	39.8	5.12
A0A0Q3WIE0	Aspartate racemase	8	1	25.6	4.93	metabolic process		catalytic activity	Pf01177		AN963_11965
A0A075R8B7	Murein DD-endopeptidase MepM	3	1	37.2	7.96			catalytic activity	Pf01551	34874933	BRLA_c037990	BRLA_RS18350
A0A220MEP0	Bacillithiol biosynthesis deacetylase BshB1	7	1	25.5	5.68	metabolic process		catalytic activity	Pf02585
A0A075R422	Dihydrolipoamide acetyltransferase component of pyruvate dehydrogenase complex	9	1	49.8	6.04	metabolic process		catalytic activity	Pf00198, Pf00364, Pf02817	34878648	BRLA_c019050	BRLA_RS09300	Citrate cycle (TCA cycle); Microbial metabolism in diverse environments; Biosynthesis of secondary metabolites; Carbon metabolism; Metabolic pathways; Pyruvate metabolism; Biosynthesis of antibiotics; Glycolysis / Gluconeogenesis
J2QKM0	Acyl-CoA dehydrogenase	17	5	42	5.35	metabolic process		catalytic activity;nucleotide binding	Pf00441, Pf02770, Pf02771, Pf08028		PMI08_04507
A0A2Z4MGW2	DUF4179 domain-containing protein	4	1	63	6.32
icmF	Fused isobutyryl-CoA mutase	11	10	121.3	5.85
A0A075RA12	General stress protein 14	8	1	20.2	5.91	metabolic process		catalytic activity	Pf02525, Pf03358	34877076	BRLA_c020590	BRLA_RS10070
A0A2S5HPM7	Cytochrome b/b6	46	8	25.2	7.3
V6M7M1	Uncharacterized protein	2	1	173.2	4.65		extracellular	protein binding	Pf05737, Pf05738		T458_12275
A0A502IQN6	2-oxoacid:ferredoxin oxidoreductase subunit beta	44	8	31	6.86
A0A177XNX2	ABC transporter ATP-binding protein	22	4	29.3	9.55			catalytic activity;nucleotide binding	Pf00005, Pf13304		AYJ08_07290

## Sheet: Unique protein (M27)
Gene name	Protein name	Coverage [%]	# Peptides	MW [kDa]	calc. pI	Biological Process	Cellular Component	Molecular Function	Pfam IDs	Entrez Gene ID	Ensembl Gene ID	Gene Symbol	KEGG Pathways
pcrB	Heptaprenylglyceryl phosphate synthase	4	1	25.5	4.54
A0A075RAN9	Putative copper-importing P-type ATPase A	2	1	68	6.23	transport	membrane	catalytic activity;metal ion binding;nucleotide binding;transporter activity	Pf00122, Pf00702, Pf12710	34877439	BRLA_c041860	BRLA_RS20190
A0A2S5H3D0	Multifunctional 2',3'-cyclic-nucleotide 2'-phosphodiesterase/5'-nucleotidase/3'-nucleotidase	14	8	67.6	7.46
A0A385TD34	Threonine synthase	29	6	37.6	6.43
A0A177XSD9	Urocanate reductase	2	1	63.2	7.02	metabolic process	membrane	catalytic activity;nucleotide binding	Pf00890, Pf03486, Pf04205		AYJ08_02380
A0A075R7M4	Flagellin	64	27	41.1	5.81	cellular component movement	extracellular	structural molecule activity	Pf00669, Pf00700	34878165	BRLA_c028690	BRLA_RS13965	Flagellar assembly; Two-component system
A0A0K9YU01	Anthranilate synthase component II	15	2	21.7	6.2	metabolic process		catalytic activity	Pf00117, Pf07722		ADS79_14435
A0A3M8C1C7	Lipoprotein	5	1	29.4	5.15
glpX	Fructose-1,6-bisphosphatase	10	2	34.3	5.27
J3AIB6	Uncharacterized protein	8	1	18.3	7.39						PMI05_00358
rocD	Ornithine aminotransferase	33	10	43.5	5.6
A0A4Y3PDX0	Probable glycine dehydrogenase (decarboxylating) subunit 1	4	2	48.8	5.59
dut	Deoxyuridine 5'-triphosphate nucleotidohydrolase	7	1	15.9	5.25
A0A177XIL4	Polyketide synthase	12	31	386.1	6.32	metabolic process		catalytic activity	Pf00106, Pf00108, Pf00109, Pf00550, Pf02801, Pf08241, Pf08242, Pf08659, Pf12847, Pf13489, Pf13561, Pf13649, Pf13847		AYJ08_18260
ribH	6,7-dimethyl-8-ribityllumazine synthase	33	3	16.8	6.3
A0A502H7N5	3-ketoacyl-ACP reductase	26	4	25.3	5.26
A0A177XS18	Carbonic anhydrase	8	1	21	6.8			catalytic activity;metal ion binding	Pf00484		AYJ08_04110
gatB	Aspartyl/glutamyl-tRNA(Asn/Gln) amidotransferase subunit B	4	2	53.4	5.64
deoD	Purine nucleoside phosphorylase DeoD-type	14	2	25.8	5.3
A0A2S5HRX3	Nickel ABC transporter substrate-binding protein	2	1	58.4	5.17
alaC	Aminotransferase	18	4	43.5	5.17
A0A3M8D599	Chromosome segregation protein SMC	2	1	125.8	6.01
pgk	Phosphoglycerate kinase	4	1	41.8	5.52
accC	Biotin carboxylase	13	4	49.5	5.15
yvdD	Cytokinin riboside 5'-monophosphate phosphoribohydrolase	18	3	20.6	6.28
fusA	Elongation factor G	10	6	76.6	5.17
rnr	Ribonuclease R	2	1	95.1	7.15
A0A220MEP0	Bacillithiol biosynthesis deacetylase BshB1	7	1	25.5	5.68	metabolic process		catalytic activity	Pf02585
A0A075R422	Dihydrolipoamide acetyltransferase component of pyruvate dehydrogenase complex	9	1	49.8	6.04	metabolic process		catalytic activity	Pf00198, Pf00364, Pf02817	34878648	BRLA_c019050	BRLA_RS09300	Citrate cycle (TCA cycle); Microbial metabolism in diverse environments; Biosynthesis of secondary metabolites; Carbon metabolism; Metabolic pathways; Pyruvate metabolism; Biosynthesis of antibiotics; Glycolysis / Gluconeogenesis
A0A075RA12	General stress protein 14	8	1	20.2	5.91	metabolic process		catalytic activity	Pf02525, Pf03358	34877076	BRLA_c020590	BRLA_RS10070
A0A177XNX2	ABC transporter ATP-binding protein	22	4	29.3	9.55			catalytic activity;nucleotide binding	Pf00005, Pf13304		AYJ08_07290

## Sheet: Unique protein (Wild-type)
Gene name	Protein name	Coverage [%]	# Peptides	MW [kDa]	calc. pI	Biological Process	Cellular Component	Molecular Function	Pfam IDs	Entrez Gene ID	Ensembl Gene ID	Gene Symbol	KEGG Pathways
H0UBX1	Glycosyltransferase, MGT family protein	12	3	44.9	4.75	metabolic process		catalytic activity	Pf00201, Pf04101, Pf13528, Pf13692		BLGI_2894
A0A177XSP0	Aldehyde dehydrogenase	39	10	50.8	5.81	metabolic process		catalytic activity	Pf00171		AYJ08_02455
A0A6M1UAG2	Lipoprotein	8	1	31	5.54
H0U7F0	SCP-2 sterol transfer family protein	12	1	11.6	6.6				Pf02036, Pf14864		BLGI_1308
A0A177XQ46	Uncharacterized protein	11	1	11.6	6.79						AYJ08_08070
A0A6M1U313	3-hydroxyacyl-CoA dehydrogenase	5	2	88.2	7.17
H0U5P1	Uncharacterized domain protein	16	1	15.2	4.82						BLGI_671
ywnA	Putative HTH-type transcriptional regulator ywnA	17	1	15.1	6.29
A0A2S5HZ06	Stage V sporulation protein D	1	1	70.5	9.2
nrdR	Transcriptional repressor NrdR	10	1	19.3	7.69
A0A518VBI7	Uncharacterized protein	6	1	20.4	5.82
kbaY	Tagatose-bisphosphate aldolase	51	14	30.8	5.4
A0A075R420	Divalent metal cation transporter MntH	4	1	48.7	9.35	transport	membrane	metal ion binding;transporter activity	Pf01566	34876542	BRLA_c029500	BRLA_RS14320
A0A3M8D3K3	ABC transporter permease	7	1	32	9.31
A0A075QYZ1	Spore coat protein	3	1	38.4	9.44					34876750	BRLA_c012320	BRLA_RS06050
A0A177XMP1	Chitinase	24	15	72.2	7.12	metabolic process		catalytic activity	Pf00553, Pf00704, Pf09478		AYJ08_08620
A0A075R4S2	Germination-specific N-acetylmuramoyl-L-alanine amidase	4	1	26.8	8.07	metabolic process		catalytic activity	Pf01520	34875979	BRLA_c002150	BRLA_RS01085	Cationic antimicrobial peptide (CAMP) resistance
A0A0K9YW50	RNA polymerase sigma factor	6	1	27.8	6.34	metabolic process;regulation of biological process		DNA binding	Pf04542, Pf04545		ADS79_11450
A0A502IVF3	Amino acid adenylation domain-containing protein	8	16	295.7	5.01
M8DJR2	Oligopeptide ABC transporter substrate-binding protein	5	2	61.8	5.27	transport			Pf00496		I532_06700
V6MFL4	Transposase	1	1	101.3	8.28	metabolic process		catalytic activity	Pf01526		T458_12420
A0A385T5C8	Cytochrome c biogenesis protein ResB	4	1	63.5	7.99
pfkA	ATP-dependent 6-phosphofructokinase	10	1	34.3	5.69
M8DTR5	Aldehyde dehydrogenase	4	1	55.4	5.3	metabolic process		catalytic activity	Pf00171, Pf05893		I532_22547
A0A177XHC5	Alkyl hydroperoxide reductase	18	1	16.7	5.14	metabolic process		antioxidant activity;catalytic activity			AYJ08_17900
rplL	50S ribosomal protein L7/L12	72	7	12.4	4.7
A0A177XI25	Aminopyrimidine aminohydrolase	34	7	26.5	5.99	metabolic process		catalytic activity	Pf03070		AYJ08_16320
atpE	ATP synthase subunit c	40	1	7.4	6.52
thyA	Thymidylate synthase	10	1	30.2	5.99
gcvT	Aminomethyltransferase	11	3	40.1	5.4
aspS	Aspartate--tRNA ligase	17	9	68	5.25
A0A0F7EG46	Stage II sporulation protein E	2	1	91.6	6.18		membrane	catalytic activity	Pf07228, Pf13672
panB	3-methyl-2-oxobutanoate hydroxymethyltransferase	7	1	31.1	6.11
rplF	50S ribosomal protein L6	45	6	19.3	10.08
A0A385T448	Superoxide dismutase	26	4	23.5	5.69
A0A075R3U3	Cyclic peptide transporter	2	1	116.7	7.61	transport	membrane	catalytic activity;nucleotide binding;transporter activity	Pf00005, Pf00144, Pf00664, Pf13207, Pf13304		BRLA_c018340
A0A518VEF5	Amidohydrolase	4	1	43.8	5.63
A0A2P7X6G3	BMP family ABC transporter substrate-binding protein	5	1	37	5.85
aroB	3-dehydroquinate synthase	7	1	40.3	5.43
A0A0Q3WIE0	Aspartate racemase	8	1	25.6	4.93	metabolic process		catalytic activity	Pf01177		AN963_11965
A0A075R8B7	Murein DD-endopeptidase MepM	3	1	37.2	7.96			catalytic activity	Pf01551	34874933	BRLA_c037990	BRLA_RS18350
A0A2Z4MGW2	DUF4179 domain-containing protein	4	1	63	6.32
A0A2S5HPM7	Cytochrome b/b6	46	8	25.2	7.3
V6M7M1	Uncharacterized protein	2	1	173.2	4.65		extracellular	protein binding	Pf05737, Pf05738		T458_12275
A0A502IQN6	2-oxoacid:ferredoxin oxidoreductase subunit beta	44	8	31	6.86
